1 [Original Article]

2 **Combining Indoor Positioning Using Wi-Fi Round-trip Time with Dust Measurement in the**  
3 **Field of Occupational Health**

4

5 Hajime Ando<sup>1\*</sup>, Shingo Sekoguchi<sup>1</sup>, Kazunori Ikegami<sup>1</sup>, Hidetaka Yoshitake<sup>1</sup>, Hiroka Baba<sup>1</sup>,

6 Toshihiko Myojo<sup>2</sup>, Akira Ogami<sup>1</sup>

7

8 **Running title:** Combining indoor positioning and dust measurements

9

10 <sup>1</sup>Department of Work Systems and Health, Institute of Industrial Ecological Sciences, University of  
11 Occupational and Environmental Health, Japan

12 <sup>2</sup>Department of Environmental Health Engineering, Institute of Industrial Ecological Sciences,  
13 University of Occupational and Environmental Health, Japan.

14

15 **\*Corresponding author**

16 Hajime Ando

17 1-1, Iseigaoka, Yahatanishi-ku, Kitakyushu, Fukuoka 807-8555, Japan; Phone Number:

18 093-603-1611; E-mail: [h-ando@med.uoeh-u.ac.jp](mailto:h-ando@med.uoeh-u.ac.jp)

19

20 Author contributions: H.A., K.I., and S.S. conceived the original idea. H.A., K.I., and S.S. conceived  
21 and planned the experiments. H.A., K.I., S.S., H.Y, and H.B. conducted the experiments. H.A. wrote  
22 the manuscript with support from K.I. A. O. and T.M. helped supervise the project. All the authors  
23 contributed to the interpretation of the results. All the authors discussed the results and contributed to  
24 the final manuscript.

25

26

27 **Abstract**

28 [Objectives] The measurement of personal exposure has been attracting increased attention for the  
29 control of hazardous substances. Although the combination of location information and personal  
30 exposure is considered highly useful, to-this-date, no simple or highly accurate indoor positioning  
31 method has been presented. Recently, Wi-Fi round-trip time (RTT) has attracted scientific attention  
32 as a highly accurate indoor positioning method. In this study, we investigated the possibility of the  
33 use of a combination of this indoor positioning method and small-dust sensors. [Methods] We  
34 measured indoor positioning and dust concentration three times during a walk in a simulated factory.  
35 A wearable particle monitor was worn on both upper arms, and a smartphone was attached to the  
36 helmet for positioning. An ultrasonic humidifier was used to spray sodium chloride solution in the  
37 factory. The measurements were conducted three times on different routes on foot (Experiment A, B,  
38 C). [Results] In indoor positioning, the error percentages, i.e., measurements that were outside the  
39 correct measurement area were 7% (49 s/700 s) in Experiment A, 2.3% (15 s/660 s) in Experiment B,  
40 and 7.8% (50 s/645 s) in Experiment C. The dust measurements were also taken without interruption.  
41 A heat map was created based on the results of both measurements. [Conclusions] Wi-Fi RTT was  
42 able to implement indoor positioning with high accuracy. Thus, the combination of indoor  
43 positioning and various sensors can be considered useful for occupational health.

44 (244/250 words)

45

46 **Keywords (from MeSH Terms):** Geographic Information Systems, Air Pollution, Indoor

47 Occupational Exposure

48

49

50

51

52 **Background**

53 In Japan, dust exposure is assessed by working environment measurements. There are some  
54 problems with this method, such as the fact that it does not always reflect the exposure status of  
55 workers when they work while moving. Therefore, an amendment to the Working Environment  
56 Measurement Standards has been planned to allow personal exposure measurements instead of  
57 conventional working environment measurements for some hazardous substances. Personal exposure  
58 monitoring is, thus, expected to be used at workplaces where it has been difficult to measure  
59 hazardous substances, such as locations where a) temporary or short-term work was conducted, b)  
60 source of dust was moving, or c) where work occurred outdoors. Although dust is not subject to  
61 personal exposure measurement by law, recent advances in sensor technology have led to the release  
62 of compact PM<sub>2.5</sub> sensors. These sensors were originally developed for the measurement of air  
63 quality, but we believe that they can also be used for the evaluation of personal exposure to dust.  
64 Therefore, we developed a wearable particle monitor (WPM), which uses a commercial sensor  
65 (HPMA115C0-003, Honeywell International, Inc., New Jersey). Even though the sensor was not  
66 calibrated based on strict protocols, the sensor's module (manufactured by Honeywell) has been  
67 reported to have a certain level of accuracy.<sup>1</sup> Given that this product has not been officially  
68 calibrated, it cannot be used for working environment measurements.

69 When conducting personal exposure measurements, it is necessary to record actions and  
70 observations.<sup>2</sup> However, recording accurate records and observations while conducting  
71 measurements is not easy, and requires the assignment of a full-time observer. Given that the details  
72 of the work may correspond to the location of the worker, recording the location information of the  
73 worker may help the recording of the work. Global Navigation Satellite System (GNSS), represented  
74 by the Global Positioning System (GPS), is the standard technology for outdoor positioning.  
75 However, for indoor positioning, there is no standard technology such as the GNSS for outdoor  
76 positioning because the satellite signal cannot be received indoors. Instead, there are several  
77 nonstandard methods, such as Bluetooth low-energy beacons,<sup>3, 4, 5</sup> Wi-Fi signals,<sup>4, 6</sup> and various  
78 sensor devices.<sup>4</sup> However, these methods have problems in terms of accuracy, and various measures  
79 have been proposed to improve their accuracy characteristics. In 2016, the Wi-Fi round-trip time  
80 (RTT) distance measurement method was standardized to IEEE802.11mc as a method with higher  
81 accuracy than these methods.<sup>7</sup> Using this standard method, distance can be measured with a high  
82 accuracy by calculating the distance from the arrival time of radio waves, instead of estimating the  
83 distance from the radio wave strength, as in the conventional methods. The Wi-Fi RTT protocol  
84 enables positioning without synchronizing the clocks of the two parties, thus eliminating the need to  
85 use high-precision clocks, such as cesium atomic clocks, and it can be easily installed by using  
86 consumer Wi-Fi access points (APs). There are only a few reports on positioning using this standard,

87 but these have been mostly restricted in the field of engineering. Therefore, in this study, we  
88 investigated the utilization of Wi-Fi RTT and WPM in the field of occupational health based on the  
89 use of a combination of Wi-Fi RTT and WPM at industrial sites.

90

91

## 92 **Methods**

93 This experiment was conducted in August 2020 at a multipurpose simulated factory at the University  
94 of Occupational and Environmental Health, Japan. The overall layout is illustrated in Figure 1.

95

### 96 **Indoor positioning**

97 Indoor positioning was measured using Wi-Fi RTT. We used a Pixel 4 smartphone (Google LLC), a  
98 Nest Wi-Fi (Google LLC) router, and three expansion points as APs. Regarding measurement  
99 applications, we were unable to find any existing software that matched the requirements of this  
100 study. Therefore, we used an open source (MIT License)<sup>8</sup> software developed by Mr. Darryn<sup>9</sup> with  
101 our own modifications. The major modifications included the change of the coordinate system of the  
102 AP, and the addition of a function to save the log. Moreover, we used the developer mode to  
103 overcome the limitation of the number of Wi-Fi scans by the Android OS. The coordinates of the AP  
104 locations were determined based on measurements with a GLM 50 C Professional (Robert Bosch

105 GmbH, Gerlingen, Germany). The heights of the AP locations were approximately 1500 mm from  
106 the floor. Given that the height was the same for all the APs, the Z coordinate was ignored in this  
107 study. The APs were placed as shown in Figure 1. The preliminary experiments determined the  
108 positioning to be inaccurate in the area around the glass showcase and the area where the floor  
109 material was made of steel. Hence, these areas were covered with paper or cloth. In a previous study,  
110 it was reported that the accuracy of the positioning varied depending on the direction of movement  
111 because of the body which acted as a shield.<sup>10</sup> Therefore, a selfie stick was fixed to the helmet, and a  
112 smartphone was installed. A photograph of the measurer is shown in Figure 2.

113

#### 114 **Confirmation of measurement accuracy**

115 Prior to this experiment, we checked the measurement accuracy with the use of a with a smartphone  
116 which was placed on a helmet and a selfie stick for Wi-Fi RTT measurements at all point locations  
117 from points A to E in Figure 1. Measurements were acquired at each point for one minute each. The  
118 coordinates measured by the laser rangefinder were used as the standard, and the deviation of the  
119 measurement by Wi-Fi RTT was calculated.

120

#### 121 **Dust measurement**

122 The WPM was used for the dust measurements. One unit of the WPM was fixed to the left and right



123 upper arms of the person who performed the measurement. Given that there was no dust source in  
124 the simulated factory, two ultrasonic humidifiers were installed, and a sodium chloride solution (2%  
125 and 5%) was sprayed. Commercial salt was used as the solute, and pure water was used as the  
126 solvent. Measurements were acquired every second, and cases with zero readings or no records were  
127 excluded. After ventilating the room for each measurement, the humidifier was turned on, and  
128 measurements started after the elapse of (at least) 3 min.

129

### 130 **Measurement procedure**

131 Measurements were acquired three times with the use of different routes. The measurer walked the  
132 designated route at a low speed of approximately 7.62 m/min. Figure 3 shows the walking route at  
133 the time of measurement.

134

### 135 **Creation of heat maps**

136 A heat map was created from the positioning information using Wi-Fi RTT and the results of dust  
137 measurements by the WPM. The location information was calculated as the median value of the  
138 X-and Y-axis coordinates every second. The heat map was created by excluding the coordinate  
139 values outside the original circumference range (a rectangular range consisted of four points: (0,  
140 -1000), (6000, -1000), (0, 9000), and (6000, 9000)). The dust concentration was determined by using

141 the median of the measured values in the area. The heat map was created using Origin 2020 (64-bit,  
142 SR1 Ver9.7.0.188, OriginLab Corporation, Northampton, Massachusetts, USA).

143

#### 144 **Ethical considerations**

145 All measurements in this study were performed by the authors and no subjects were involved.

146 Therefore, the study was not reviewed by the Ethics Committee because it was not considered to

147 meet the requirements for ethical review.

148

#### 149 **Results**

150 The results of the accuracy verification are shown in Figure 4. The mean deviation (SD) from the

151 laser rangefinder position at each point was 1087.9 (133.7) mm at point A, 1000.6 (63.7) mm at

152 point B, 748.3 (31.5) mm at point C, 669.2 (94.3) mm at point D, and 918.4 (396.8) mm at point E.

153 The results of indoor positioning are shown in Figure 5. In the locations where the measurer could

154 not exist, such as behind the showcase or behind the wall, which were “outside of the rectangle

155 which comprised the four points of (0, -1000), (6000, -1000), (0, 9000), (6000, 9000),” the error

156 percentages were recorded at 7% (49 s /700 s) in Experiment A, 2.3% (15 s /660 s) in Experiment B,

157 and 7.8% (50 s/645 s) in Experiment C. The results of the WPM measurements are shown in

158 Appendix 1. Figure 6 shows the heat map created by combining the two datasets.

159

160 **Discussion**

161 To assess the accuracy of each experiment, it was found that the error in this measurement system  
162 was approximately 1 m. In a previous study, it was reported that the average measurement error of  
163 Wi-Fi RTT was 1.4 m in an outdoor experiment in which the measurement points were set in a grid  
164 pattern at equal intervals.<sup>11</sup> Another study reported the average measurement error of Wi-Fi RTT to  
165 be 0.10 m in an outdoor experiment and 0.23 m in an indoor experiment in which the measurement  
166 points were set along a straight line with equal intervals.<sup>12</sup> Although the accuracy in this study was  
167 worse than this, it is considered to be good enough for use in the workplace. The accuracy of GNSS  
168 positioning using a smartphone has been reported to be approximately 8–10 m,<sup>13</sup> and Wi-Fi RTT is  
169 expected to be more accurate than the GNSS if properly configured.

170 We were able to obtain the same path as the walker indoors using the Wi-Fi RTT. Although there was  
171 a certain amount of error in the accuracy verification, we were able to measure continually the path  
172 of movement, and there was no interruption in the path. The experiments were conducted on three  
173 different walking routes, and no remarkable differences were observed in the positioning results of  
174 Wi-Fi RTT. It was assumed that the human body influenced the Wi-Fi RTT positioning, as it has  
175 been reported previously<sup>10</sup>. To overcome this issue, the smartphone was held at a high position. In  
176 addition, in this study, we coated the glass and metal parts in advance, which were found to degrade

177 the accuracy of measurements in the preliminary investigation. In this regard, it has been assumed  
178 that the reflection and refraction of radio waves caused by glass and metal reduces the accuracy.  
179 Hence, it is necessary to conduct tests in advance and resolve this issue before using Wi-Fi RTT for  
180 measurements in actual workplaces. There have been attempts to create fingerprints using Wi-Fi  
181 RTT and utilize machine learning.<sup>14</sup> Accordingly, the accuracy of this method is expected to improve  
182 as the technology develops. However, most of the validation studies on the accuracy of Wi-Fi RTT  
183 have been conducted in empty plazas or ordinary offices, and it is desirable to conduct these  
184 verification studies in industrial settings, such as factories. Although we did not verify the accuracy  
185 of the measurement while walking this time, it is presumed that there is a certain degree of accuracy  
186 even when walking given that the walking path was measured without interruption (Figure 5).  
187 Considering the fact that the mesh of the heat map is 1 m, the measurement was conducted by  
188 walking at an extremely low speed. In the actual work site, it is assumed that people will move by  
189 walking more quickly. Given that most of the work itself is done in stationary conditions, and the  
190 accuracy in such cases has been verified, it is not expected to be a major problem. To expand the  
191 usage of indoor positioning, an additional study on accuracy during motion is required.

192

193 One of the advantages of Wi-Fi RTT is that it can be used in local networks, while the GNSS  
194 requires orbital information from satellites to identify the location. Without the Internet, it takes

195 more than 30 s to obtain orbital information from GNSS satellites, and the accuracy is initially low.<sup>15</sup>  
196 Given that Wi-Fi RTT requires only an AP and a smartphone for positioning, it does not require this  
197 external connection or orbit information acquisition. Instead, Wi-Fi RTT requires the coordinate  
198 information of the AP, which is not a concern as the coordinate information of the AP is already  
199 known by the company. This can offer a great advantage in the field of occupational health given  
200 that external connections are often difficult to access in companies. In this study, we used Wi-Fi RTT  
201 in combination with dust measurement, but the GNSS has already been used in various applications,  
202 such as geo-fencing, for disaster prevention.<sup>16</sup> If highly accurate positioning becomes achievable  
203 indoors, various applications can be expected to be possible.

204

205 Unlike the existing methods, Wi-Fi RTT calculates the distance based on the arrival time of the radio  
206 wave rather than on the strength of the radio wave. Theoretically, the radio wave strength attenuates  
207 in proportion to the square of the distance, but in reality, this is not always the case owing to the  
208 effects of various noise sources. The actual formula for estimating distance using radio wave  
209 strength is as follows<sup>17</sup>:

$$210 \quad RSSI[dBm] = -(10n \log_{10} d - Tx) \quad (1)$$

211 In this formula, RSSI is the strength of the received signal,  $d$  is the distance between the transmitter  
212 and receiver,  $n$  is a constant that represents the attenuation, and  $Tx$  is the output of the transmitter.

213 Moreover,  $n$  varies depending on the environment; therefore, it is difficult to uniquely determine it in  
214 advance. In contrast, Wi-Fi RTT uses the arrival time, and is thus considered to be less susceptible to  
215 noise. However, both methods are affected by the reflection, refraction, and diffraction of radio  
216 waves; hence, it is necessary to pay attention to this point. In this study, the smartphone was placed  
217 on a helmet to reduce these effects. However, considering safety protocols, it may not be realistic to  
218 use this method at the workplace. A more stable fixation method should be considered along with  
219 technological advances that make the machine smaller and lighter. In this study, we set the height of  
220 all the APs and smartphones to be almost the same by ignoring the Z-axis. However, if each AP is set  
221 at a higher position such that the radio wave can reach the smartphone directly without being  
222 blocked, more stable positioning may be possible; this possibility requires further verification.

223

224 Although there is no specific limit to the number of times Wi-Fi RTT can be used, the Android OS  
225 specification sets a limit to the number of times the Wi-Fi APs can be scanned.<sup>18</sup> In addition, there is  
226 a limit to the number of times the Wi-Fi RTT can be used in the background and for other location  
227 information; however, no such limit exists for its use in the foreground.<sup>19</sup> It was reported that Wi-Fi  
228 RTT consumes excessive battery and is associated with certain privacy issues. When the restriction  
229 is enabled, scanning for Wi-Fi APs is suppressed. This may prevent adequate positioning. We  
230 eliminated this restriction by using the developer mode in this study, which enabled us to unlock the

231 restriction. While it is possible to consider unlocking the restriction in the same way for  
232 company-owned smartphones, this method is not recommended for individually owned smartphones  
233 because unlocking is a function for developers. Restrictions may change over time and should be  
234 monitored carefully.

235

236 In this study, the dust measurement outcomes of the right upper arm were generally higher than  
237 those of the left upper arm. The right side of the walking route was closer to the humidifier than the  
238 left side, and the results were considered to be consistent with this. Looking over the heat maps of  
239 the three experiments, it can be confirmed that the dust concentration near the humidifier with a 5%  
240 saline solution (6600, 3600) was higher than in other areas. This can be considered a reflection of the  
241 dust emission situation in the experimental environment. In addition, it can be confirmed that the  
242 dust concentration near “ $x = 2000 - 4000$ ,  $y = 7000 - 9000$ ” is high. In this experiment, the  
243 humidifier, which is a dust source, was installed at (0, 6400) and (6600, 3600), and resulted in a gap  
244 between the dust source and areas of high concentration in the heat map. One of the reasons for this  
245 discrepancy may be the influence of errors in the position measurement. Given that the location  
246 information acquisition method used in this experiment had certain limitations, it is possible that the  
247 location information was recorded at the point at which the measurer did not actually exist, and the  
248 location on the heat map associated with a relatively high-dust concentration was shifted. However,

249 it is possible to interpret the results by assuming that the influence of the error in positional  
250 measurement was not significant, i.e., the heat map accurately reflected the dust concentration in the  
251 environment to some extent. There could be two possible reasons for this. First, the dust may have  
252 been carried away by the movement of the measurer to the location in question. This point was  
253 visually confirmed during the experiment (including the preliminary experiment), although it has not  
254 been precisely verified or evaluated. Second, there is a possibility of the dust being shifted to the  
255 location in question by the operation of the ventilation fan in the simulated factory. By creating a  
256 heat map of the dust levels, it was possible to visually understand the dust emissions in the  
257 environment. It is possible that the high-dust concentrations formed at a distance from the  
258 dust-emission source were not fully identifiable by the usual measurement of the working  
259 environment. In this study, we used a 1 m mesh, which was more detailed than the 6 m mesh for  
260 measurements in the working environment. Although it was not possible to measure all the points  
261 simultaneously, it was still possible to obtain data at many points.

262 The ability to visually and easily confirm the distribution of dust by combining location information  
263 and dust meter results is considered extremely useful in implementing industrial health activities.

264 There have been reports that aimed to gain an understanding on the distribution of the air dose rates  
265 after the accident at the Fukushima nuclear power plant to map the concentration/amount of  
266 hazardous substances in combination with location information.<sup>20, 21</sup> However, these reports have



267 used the GNSS in outdoor environments. In the past, indoor positioning was difficult. Therefore, to  
268 create these heat maps, it was necessary to determine the position from video camera images, which  
269 was very complicated. In addition, personal exposure measurement sometimes involves  
270 synchronization of continuous recordings using a real-time monitor with a data logger and video  
271 images acquired during work to visually capture the changes in exposure that accompany work  
272 changes.<sup>22</sup> In the past, work scenes were filmed and analyzed, but recent studies have been  
273 conducted wherein a small camera and a small dust meter were attached to a helmet, and the camera  
274 and dust meter were synchronized to assess the dust emission status.<sup>23</sup> Although this approach has  
275 been in use for a while, it has not been extensively used in actual occupational health settings. One  
276 of the reasons for this is attributed to the fact that as the measurement time increases, more time is  
277 required to check the video images during the analysis of continuous recordings of the exposure  
278 status and the synchronization of the video images. Therefore, it would be more practical to focus on  
279 situations associated with high exposures rather than to check all the situations during the entire  
280 measurement period. Our method had a great advantage in that we could overview the entire  
281 workplace in a relatively short time. However, with the use of our study's method, if a worker stays  
282 in the same place for a long time, the heat map will show only one point; hence, it is necessary to  
283 limit the analysis duration or adjust the size of the heat map. In case it is not possible to uniquely  
284 link the work location with the work content, a combination of video images can be considered.

285 This study had a few limitations that must be considered. First, measurement in the study was  
286 conducted using only one piece of equipment. It was not clear whether measurements obtained from  
287 this equipment can be generalized to those obtained from other equipment. However, at present, few  
288 devices officially support Wi-Fi RTT in Japan. It is also unavoidable that the most commonly  
289 available devices are made by Google. In particular, there are only four APs listed on the Android  
290 developer site as Wi-Fi RTT-compliant APs, and three of them are made by Google.<sup>24</sup> The fourth one  
291 is made by a company other than Google, but it is a foreign product and cannot be used because it  
292 does not have a technical standards compliance certificate in Japan. However, the number of  
293 compatible smartphones is gradually increasing, and we expect that this number will continue to  
294 increase. Second, we did not conduct simultaneous measurements of the measurer's position using  
295 the standard method. Although no large discrepancies between the movement trajectories are  
296 presumed, it was not possible to quantitatively evaluate the degree of discrepancy. Given that the  
297 accuracy required for use in the workplace is likely to vary from workplace to workplace, additional  
298 evaluations are necessary. Third, the simulated factory used in this study had fewer obstructions than  
299 a typical factory, and hence, the measurement accuracy may have been overestimated. It is necessary  
300 to conduct surveys in more environments, and in certain cases, to combine methods such as  
301 fingerprinting for more robust results.

302 High-precision indoor positioning technology is expected to be used in a wide range of applications,

303 such as the monitoring and evaluation of the working environment and the vital signs of workers,  
304 based on its combination with various sensors. Furthermore, this technology is of value in the field  
305 of occupational health as it can be used to conduct evaluations in various environments and with  
306 various measurement instruments.

307

### 308 **Conclusion**

309 In this study, we visually clarified the distribution of dust concentration in the workplace in the form  
310 of a heat map by combining Wi-Fi RTT and WPM. The results in this study indicate that the  
311 combination of location information and various sensor devices may be beneficial for occupational  
312 health. Additional developments in this forefront are expected in the future.

313

### 314 **Acknowledgements**

315 We would like to thank Dr. Takashi Moritake, Dr. Yo Ishigaki, and Mr. Norihisa Kosukegawa for  
316 their efforts in the development of the WPM used in this study. We would like to thank Editage  
317 (<http://www.editage.com>) for editing and reviewing this manuscript for English language. This study  
318 was funded by the Industrial Disease Clinical Research Grant (180302-01).

319

### 320 **Disclosures**

321 Approval of the research protocol: N/A

322 Informed Consent: N/A

323 Registry and the Registration No. of the study/trial: N/A

324 Animal Studies: N/A

325 Conflict of Interest: Authors declare no conflict of interest for this article.

326

327

328 **References**

329 1) Hapidin DA, Saputra C, Maulana DS, Munir MM, Khairurrijal K. Aerosol chamber  
330 characterization for commercial particulate matter (PM) sensor evaluation. *Aerosol Air Qual*  
331 *Res.* 2019; 19(1): 181–94. doi: 10.4209/aaqr.2017.12.0611

332 2) Hashimoto H, Yamada K, Hori H, et al. Guidelines for personal exposure monitoring of  
333 chemicals: Part IV. *J Occup Health.* 2018; 60(2): 103–10. doi: 10.1539/joh.17-0311-RA

334 3) Huang K, He K, Du X. Hybrid method to improve BLE-based indoor positioning in a dense  
335 Bluetooth environment. *Sensors.* 2019; 19(2): 424. doi: 10.3390/s19020424

336 4) Yamashita K, Oyama S, Otani T, et al. Smart hospital infrastructure: Geomagnetic  
337 in-hospital medical worker tracking. *J Am Med Inform Assoc.* 2020. doi:  
338 10.1093/jamia/ocaa204

- 339 5) Li G, Geng E, Ye Z, Xu Y, Lin J, Pang Y. Indoor positioning algorithm based on improved  
340 RSSI distance model. *Sensors*. 2018; 18(9): 2820. doi: 10.3390/s18092820
- 341 6) Wang Y, Zhao B, Jiang Z. RSSI-based smooth localization for indoor environment. *Sci*  
342 *World J*. 2014; 2014: 639142. doi: 10.1155/2014/639142
- 343 7) IEEE Standard for Information Technology—Telecommunications and information  
344 exchange between systems Local and metropolitan area networks—Specific  
345 requirements—Part 11: Wireless LAN Medium Access Control (MAC) and Physical Layer  
346 (PHY) Specifications. IEEE Std 80211-2016 (Revision of IEEE Std 80211-2012). 2016:  
347 1–3534.
- 348 8) The MIT License. Accessed September 22, 2020.  
349 <https://opensource.org/licenses/mit-license.php>.
- 350 9) Campbell D. Darryncampbell/WiFi-RTT-Trilateration. Accessed September 22, 2020.  
351 <https://github.com/darryncampbell/WiFi-RTT-Trilateration>.
- 352 10) Guo G, Chen R, Ye F, Peng X, Liu Z, Pan Y. Indoor smartphone localization: A hybrid  
353 WiFi RTT-RSS Ranging Approach. *IEEE Access*. 2019; 7: 176767–81. doi:  
354 10.1109/ACCESS.2019.2957753
- 355 11) Bai YB, Kealy A, Retscher G, Hoden L. A comparative evaluation of Wi-Fi RTT and  
356 GPS-based positioning. *Proceedings of the International Global Navigation Satellite*

- 357            *Systems IGNSS 2020 Conference*. February 2020; 5–7. Sydney, Australia.
- 358            <https://www.ignss2020.unsw.edu.au/sites/ignss2020/files/uploads/proceedings/papers/paper>
- 359            [\\_10.pdf](#)
- 360    12)    Ogawa M, Choi H. Measurement accuracy of Wi-Fi FTM on actual devices. *IEICE*
- 361            *Communications Express*. 2020; 9(12): 567–72. doi: 10.1587/comex.2020COL0001
- 362    13)    Massad I, Dalyot S. Towards the crowdsourcing of massive smartphone assisted-GPS
- 363            sensor ground observations for the production of digital terrain models. *Sensors*. 2018;
- 364            18(3): 898. doi: 10.3390/s18030898
- 365    14)    Huang L, Yu B, Li H, et al. HPIPS: A high-precision indoor pedestrian positioning system
- 366            using WiFi-RTT, MEMS, and map information. *Sensors*. 2020; 20(23): 6795. doi:
- 367            10.3390/s20236795
- 368    15)    Lehtinen M, Happonen A, Ikonen J. Accuracy and time to first fix using consumer-grade
- 369            GPS receivers. *Proceedngs of the 16th International Conference on Software,*
- 370            *Telecommunications and Computer Networks*. September 2008; 25–27. Split, Croatia.
- 371            IEEE. doi: 10.1109/SOFTCOM.2008.4669506
- 372    16)    Zimelman E, Keefe R, Strand E, Colden C, Wemp A. Hazards in Motion: Development of
- 373            Mobile Geofences for Use in Logging Safety. *Sensors*. 2017; 17(4): 822. doi:
- 374            10.3390/s17040822

- 375 17) Huh JH, Seo K. An Indoor Location-Based Control System Using Bluetooth Beacons for  
376 IoT Systems. *Sensors*. 2017; 17(12): 2917. doi: 10.3390/s17122917
- 377 18) Google LLC. Wi-Fi scanning overview. Accessed February 2, 2020.  
378 <https://developer.android.com/guide/topics/connectivity/wifi-scan>.
- 379 19) Google LLC. Background location limits. Accessed February 2, 2020.  
380 <https://developer.android.com/about/versions/oreo/background-location-limits>.
- 381 20) Tsuda S, Yoshida T, Andoh M, et al. IV Practical aspects of air dose rate measurements in  
382 the environment. *Radioisotopes*. 2015; 64(4): 275–89. doi: 10.3769/radioisotopes.64.275
- 383 21) Tanigaki M. Development of GPS-linked radiation measurement systems  
384 KURAMA/KURAMA-II. *Japanese Journal of Health Physics*. 2015; 50(2): 138–47. doi:  
385 10.5453/jhps.50.138
- 386 22) Rosen G, Andersson IM, Walsh, PT, et al. Video exposure monitoring as an occupational  
387 hygiene tool. *Annals Occup Hyg*. 2005; 49(3): 201–17. doi: 10.1093/annhyg/meh110
- 388 23) Cecala AB, Reed WR, Joy GJ, Westmoreland SC, O'Brien OD. Helmet-Cam: tool for  
389 assessing miners' respirable dust exposure. *Min Eng*. 2013; 65(9): 78–84.
- 390 24) Google LLC. Wi-Fi location: ranging with RTT. Accessed February 2, 2020.  
391 <https://developer.android.com/guide/topics/connectivity/wifi-rtt>.
- 392

393

394 **Figure Legends**

395 Figure 1. Overview and photographs of the model factory.

396 A to E indicate the positions of the measurement points for accuracy verification.

397 The coordinates measured by the laser rangefinder are A (2900, 6500), B (1900, 3000), C (3000,  
398 3200), D (5700, 2800), and E (3100, 800) (AP, access point).

399

400 Figure 2. Photograph of the measurer.

401 A wearable particle monitor was worn on both upper arms. A smartphone for indoor positioning was  
402 attached to the helmet using a selfie stick.

403

404 Figure 3. Walking path during the measurement.

405

406 Figure 4. Results of accuracy verification

407 The small dots indicate the position measured by the Wi-Fi RTT at each measurement point. The  
408 square dots indicate the actual position of each measurement point.

409

410 Figure 5. Indoor positioning results.



411 Each dot indicates the position coordinates measured by the Wi-Fi RTT. The location information  
412 was calculated as the median value of the X- and Y-axis coordinates every second. The range  
413 enclosed by the dotted line and the Y-axis is the walking range.

414

415 Figure 6. Heat maps.

416 The color of each area indicates the median dust concentration in that area (Rt, right-hand side; Lt,  
417 left-hand side).

418

419 Appendix 1. Results of dust measurements (Rt, right-hand side, Lt, left-hand side).

420

421

422

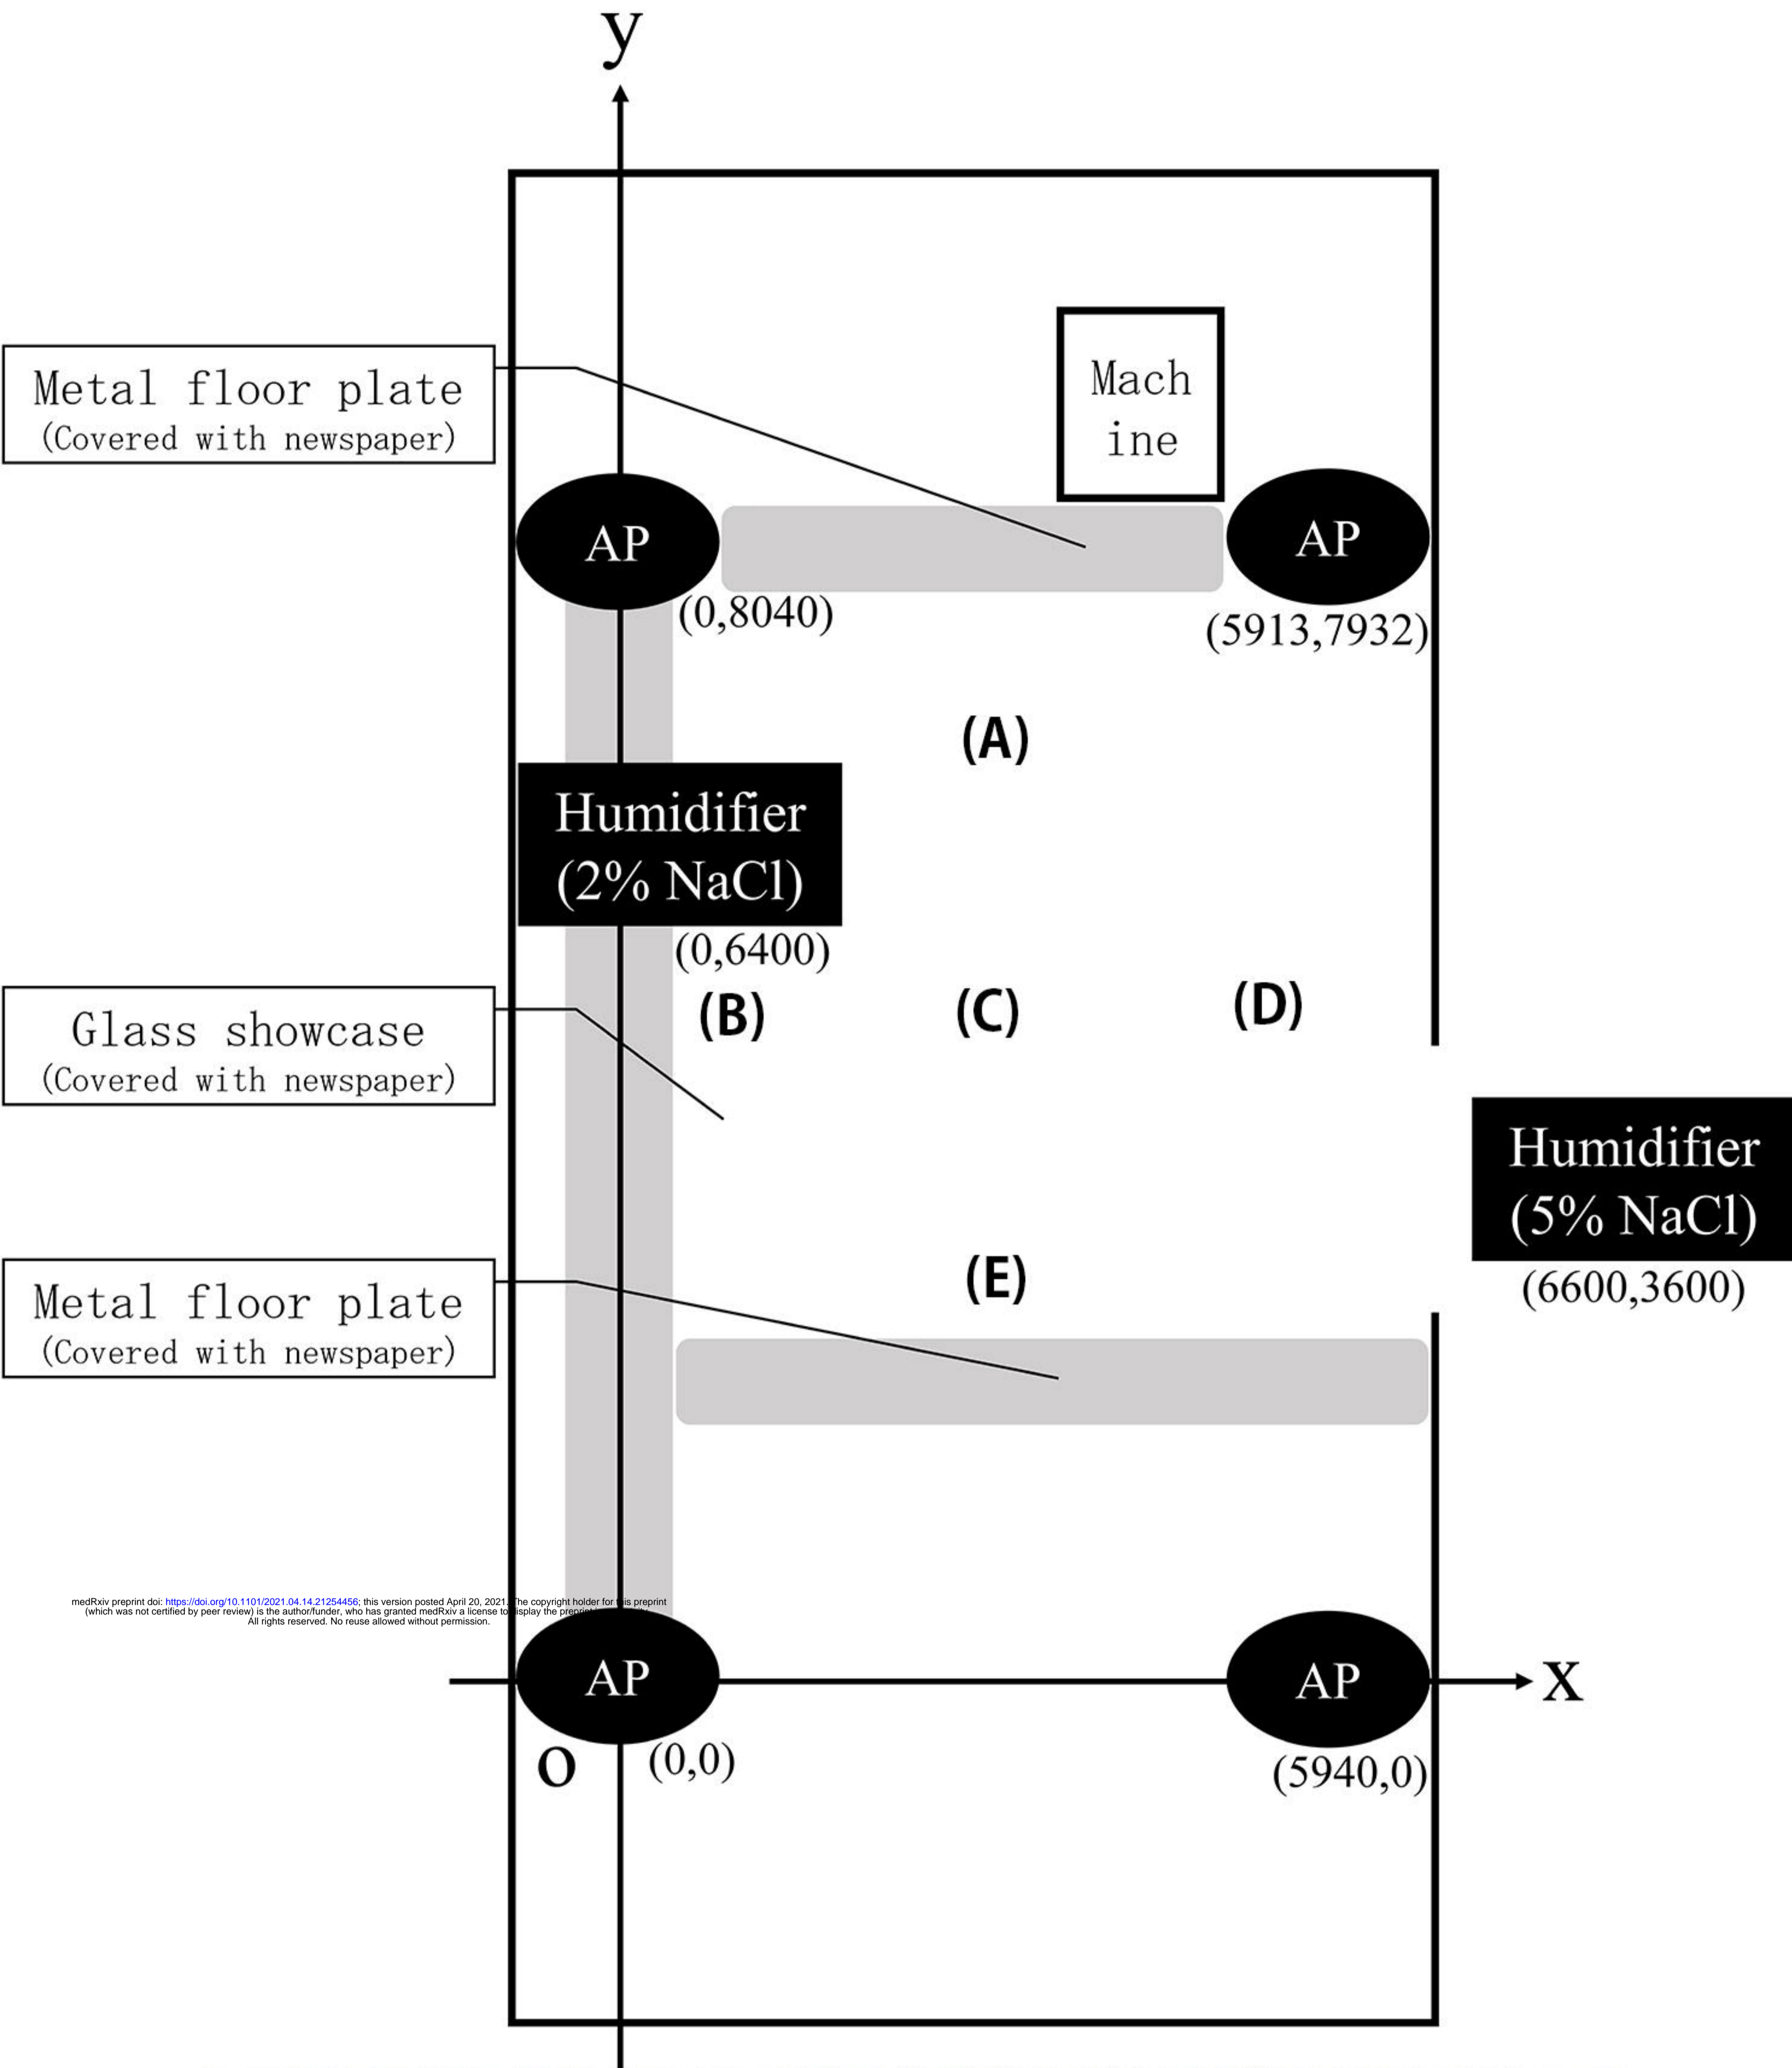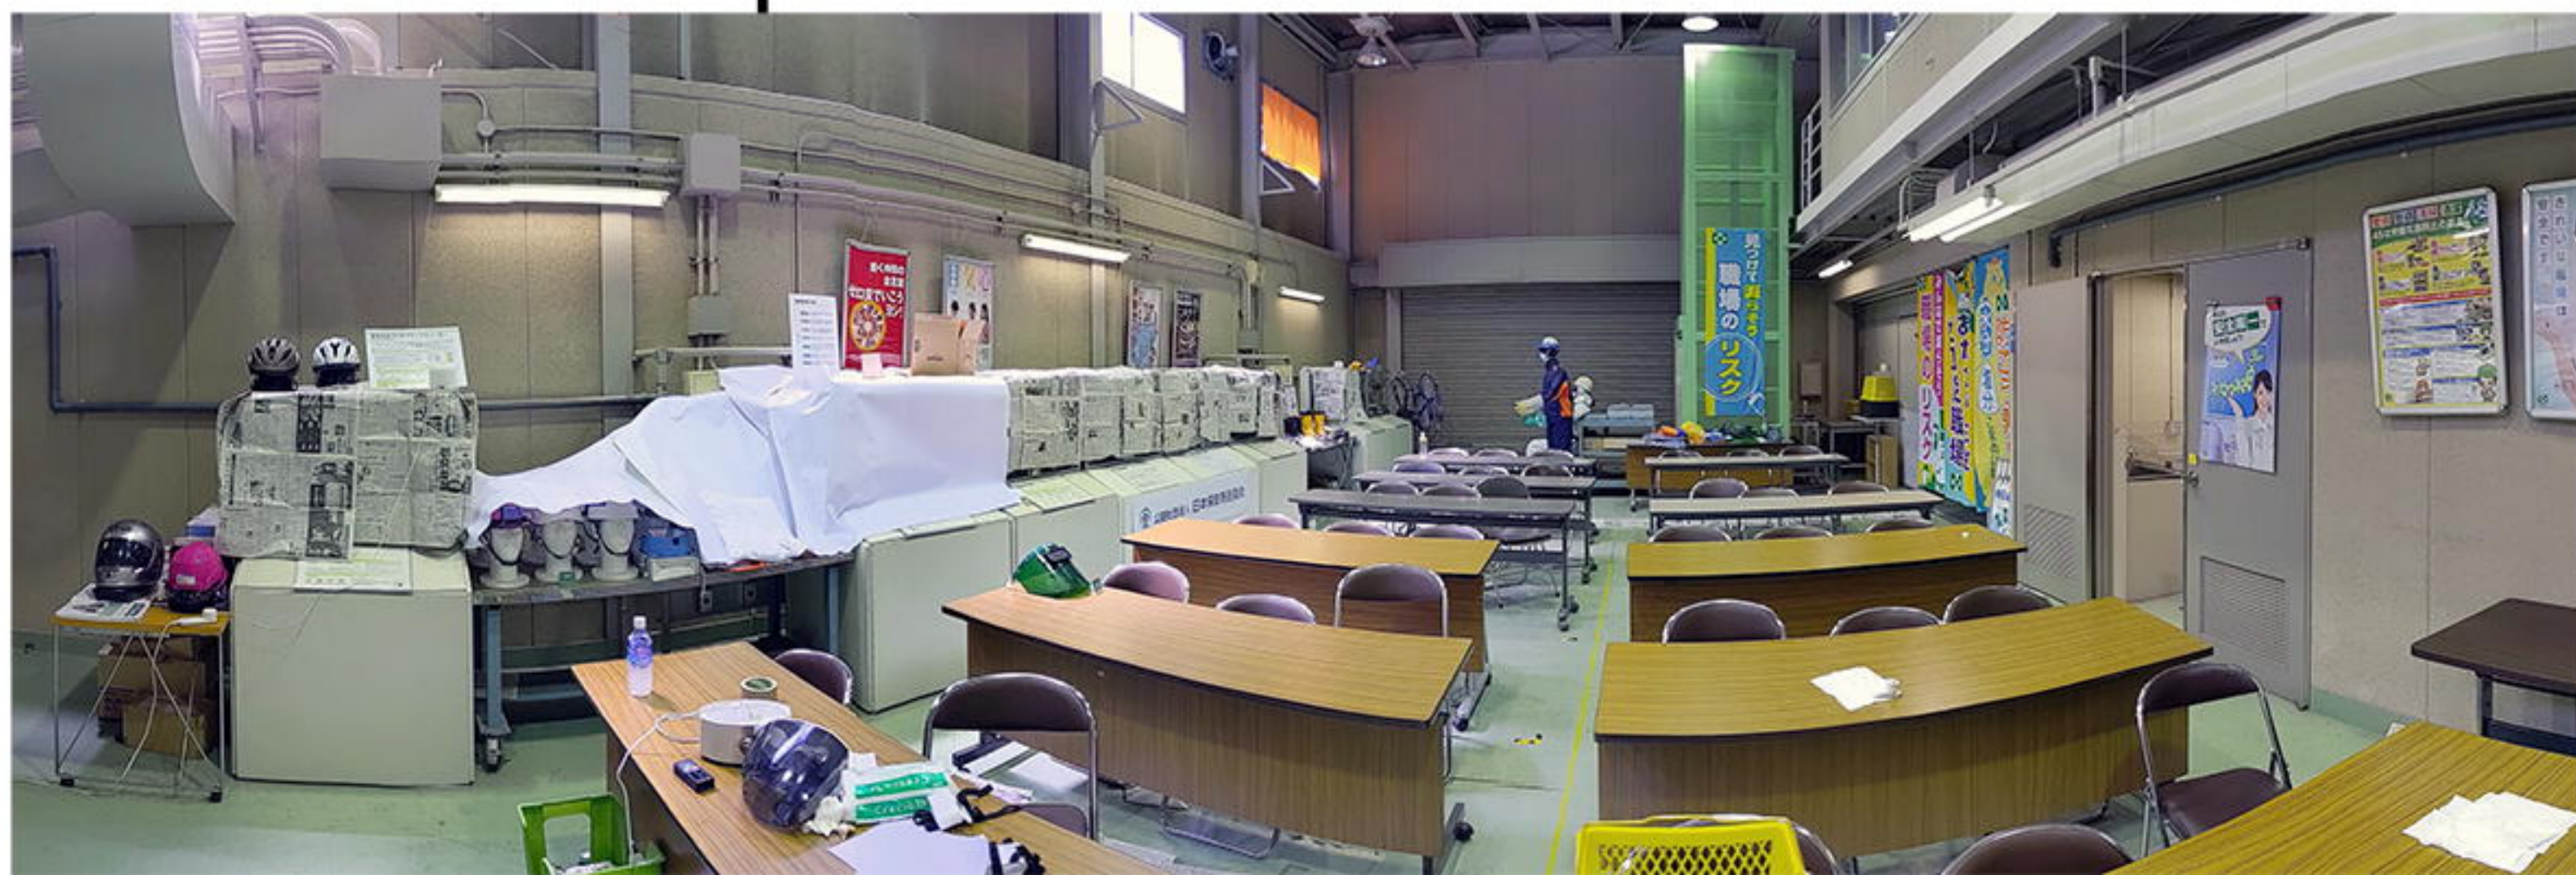

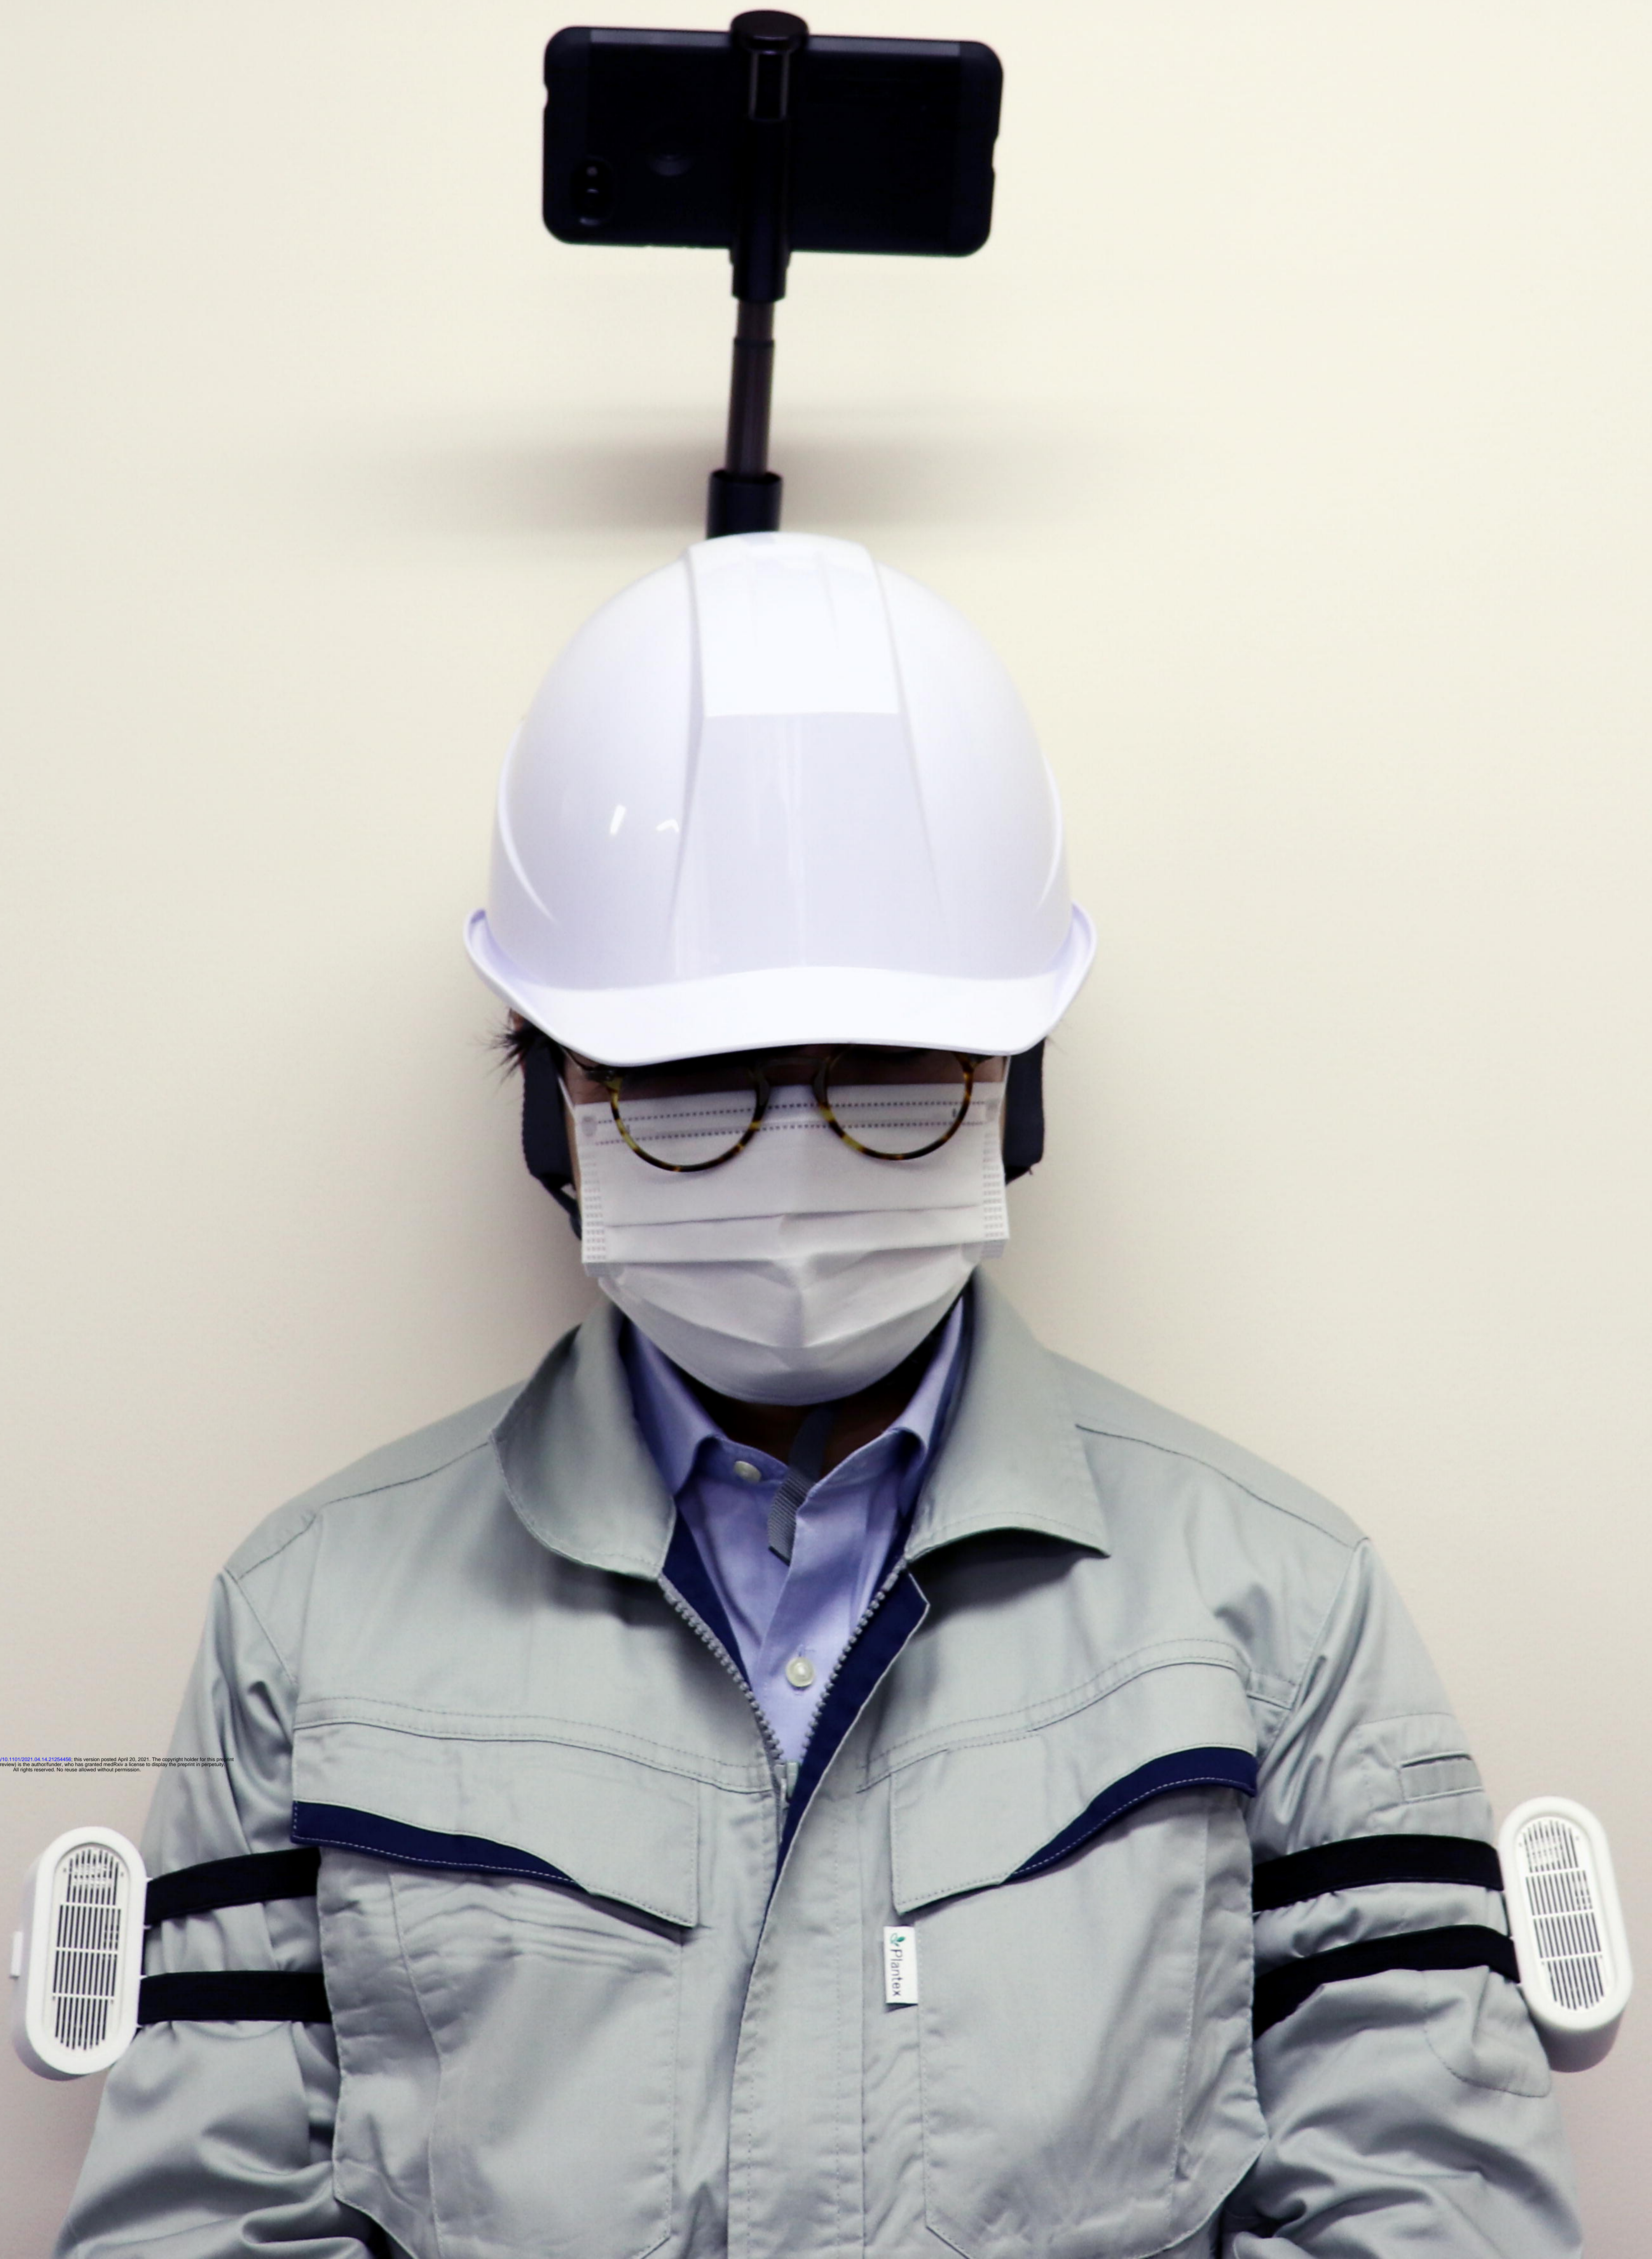

medRxiv preprint doi: <https://doi.org/10.1101/2021.04.14.21254456>; this version posted April 20, 2021. The copyright holder for this preprint (which was not certified by peer review) is the author/funder, who has granted medRxiv a license to display the preprint in perpetuity. All rights reserved. No reuse allowed without permission.

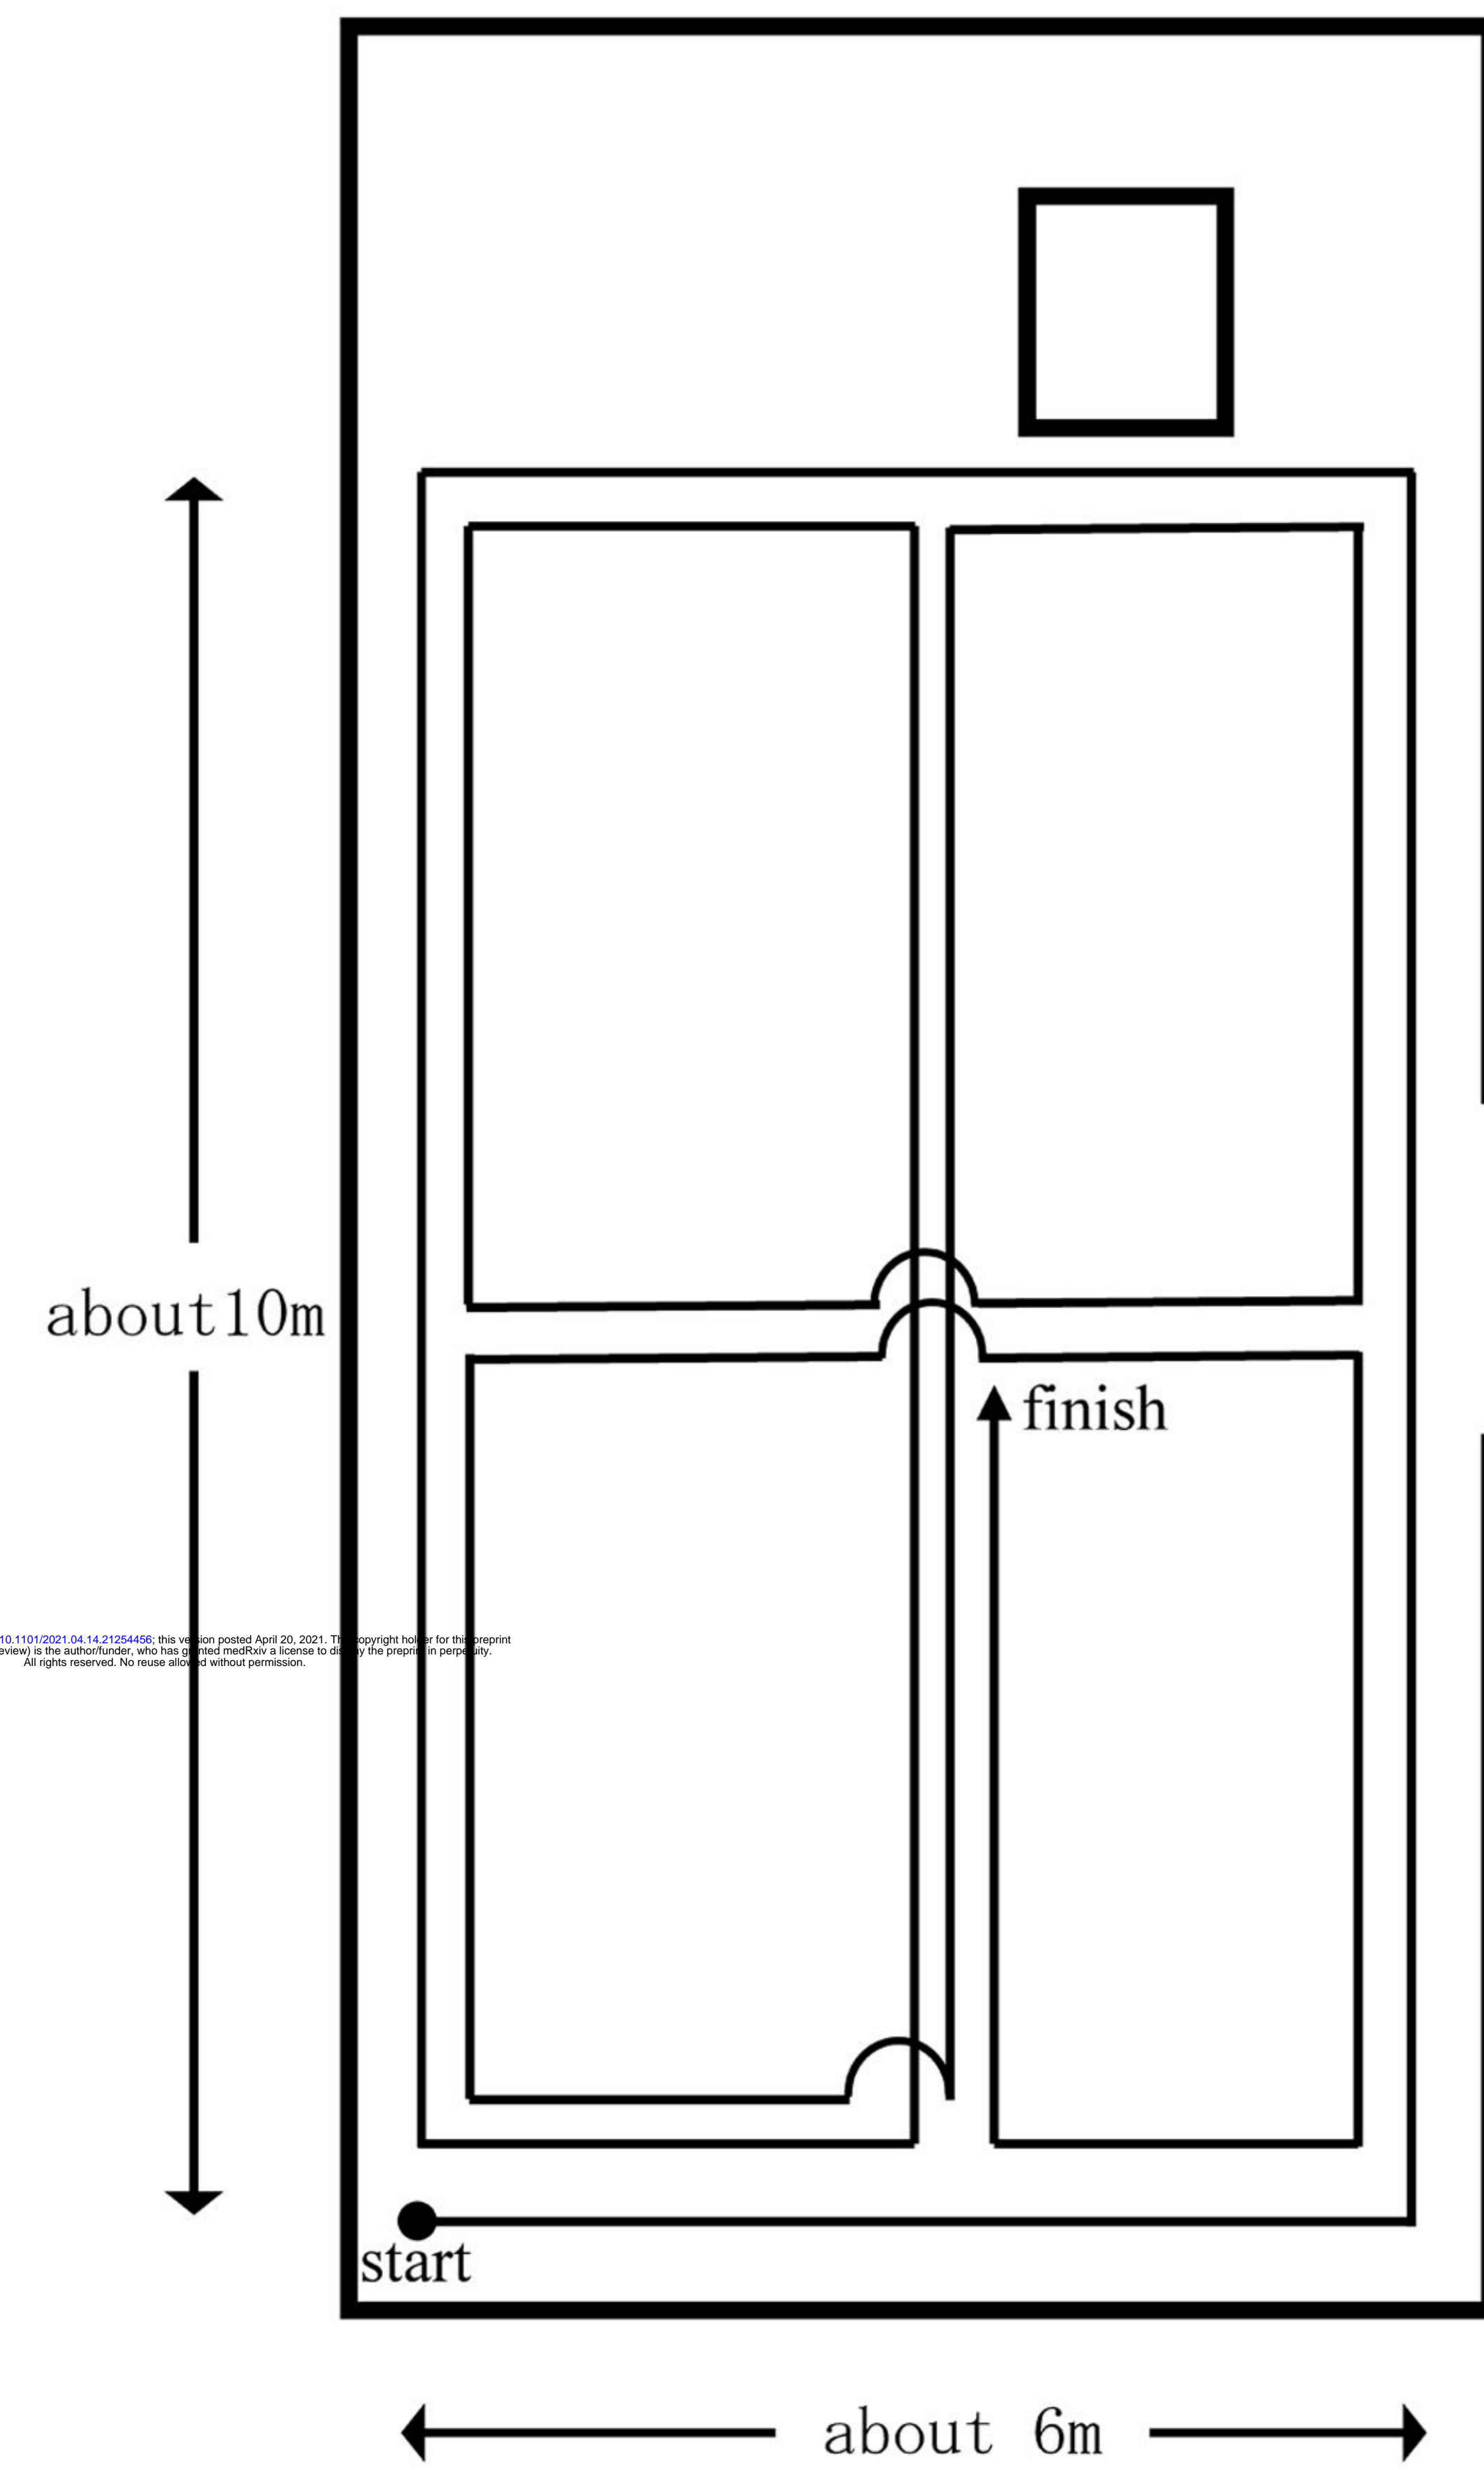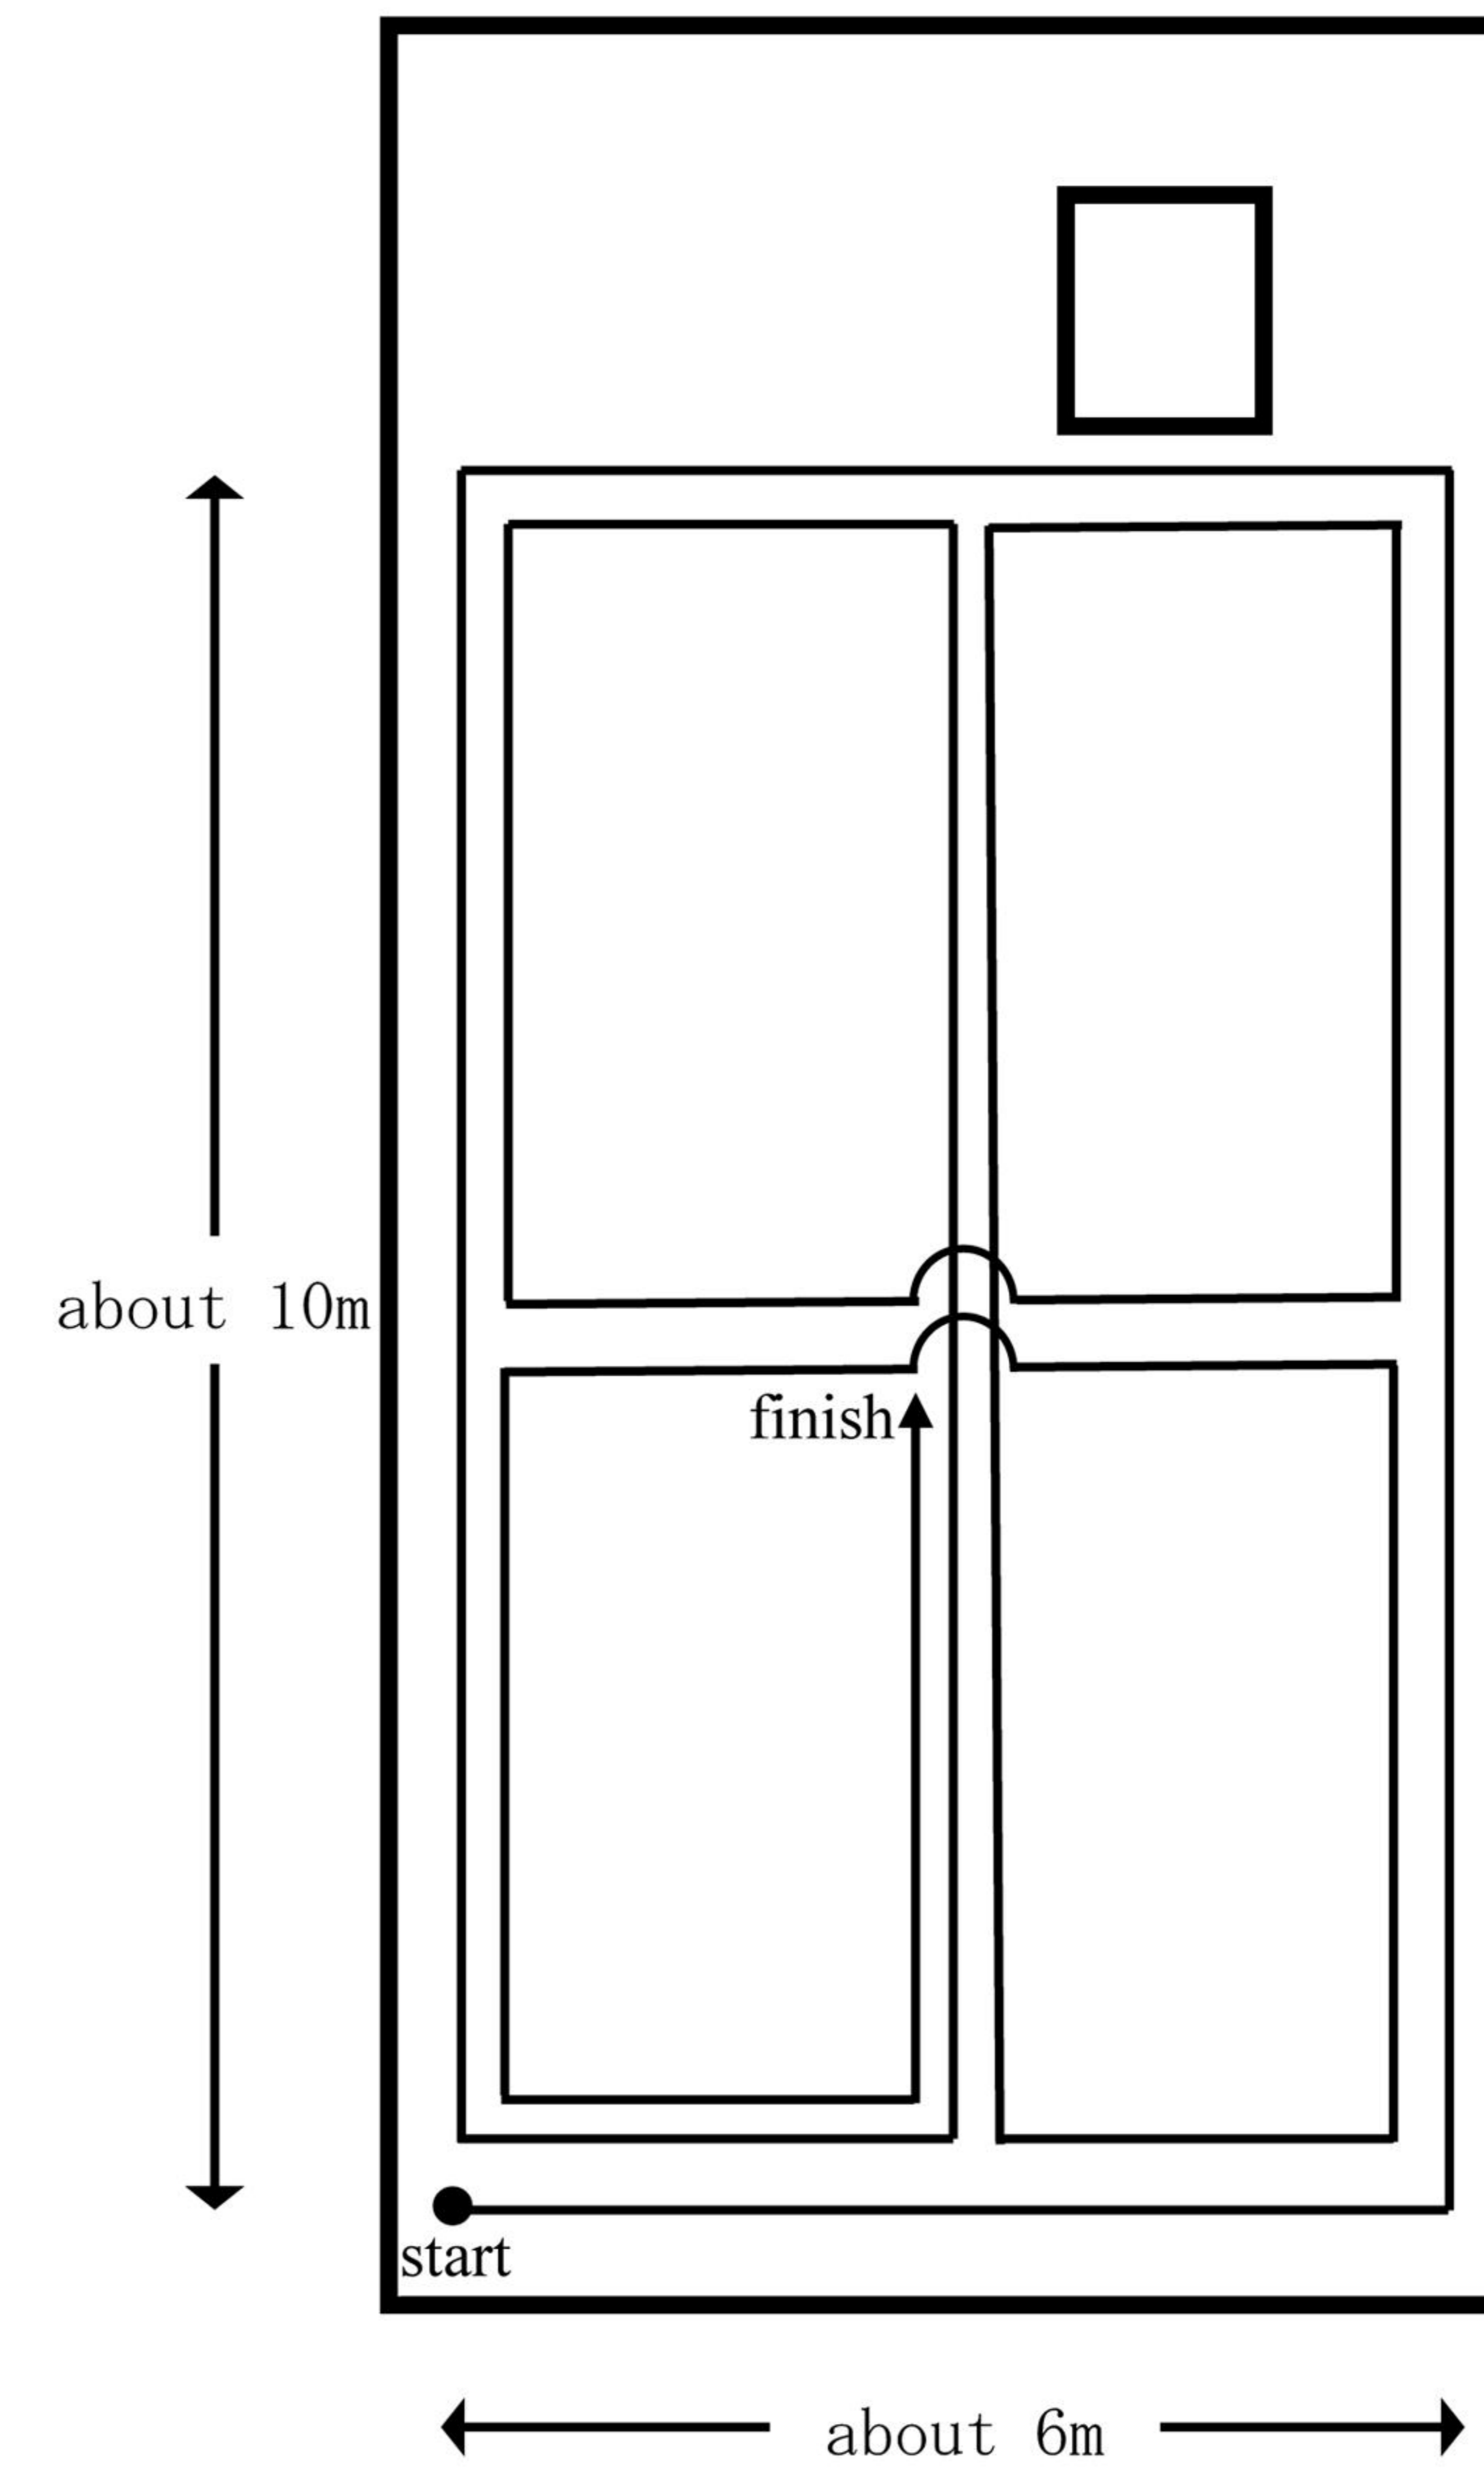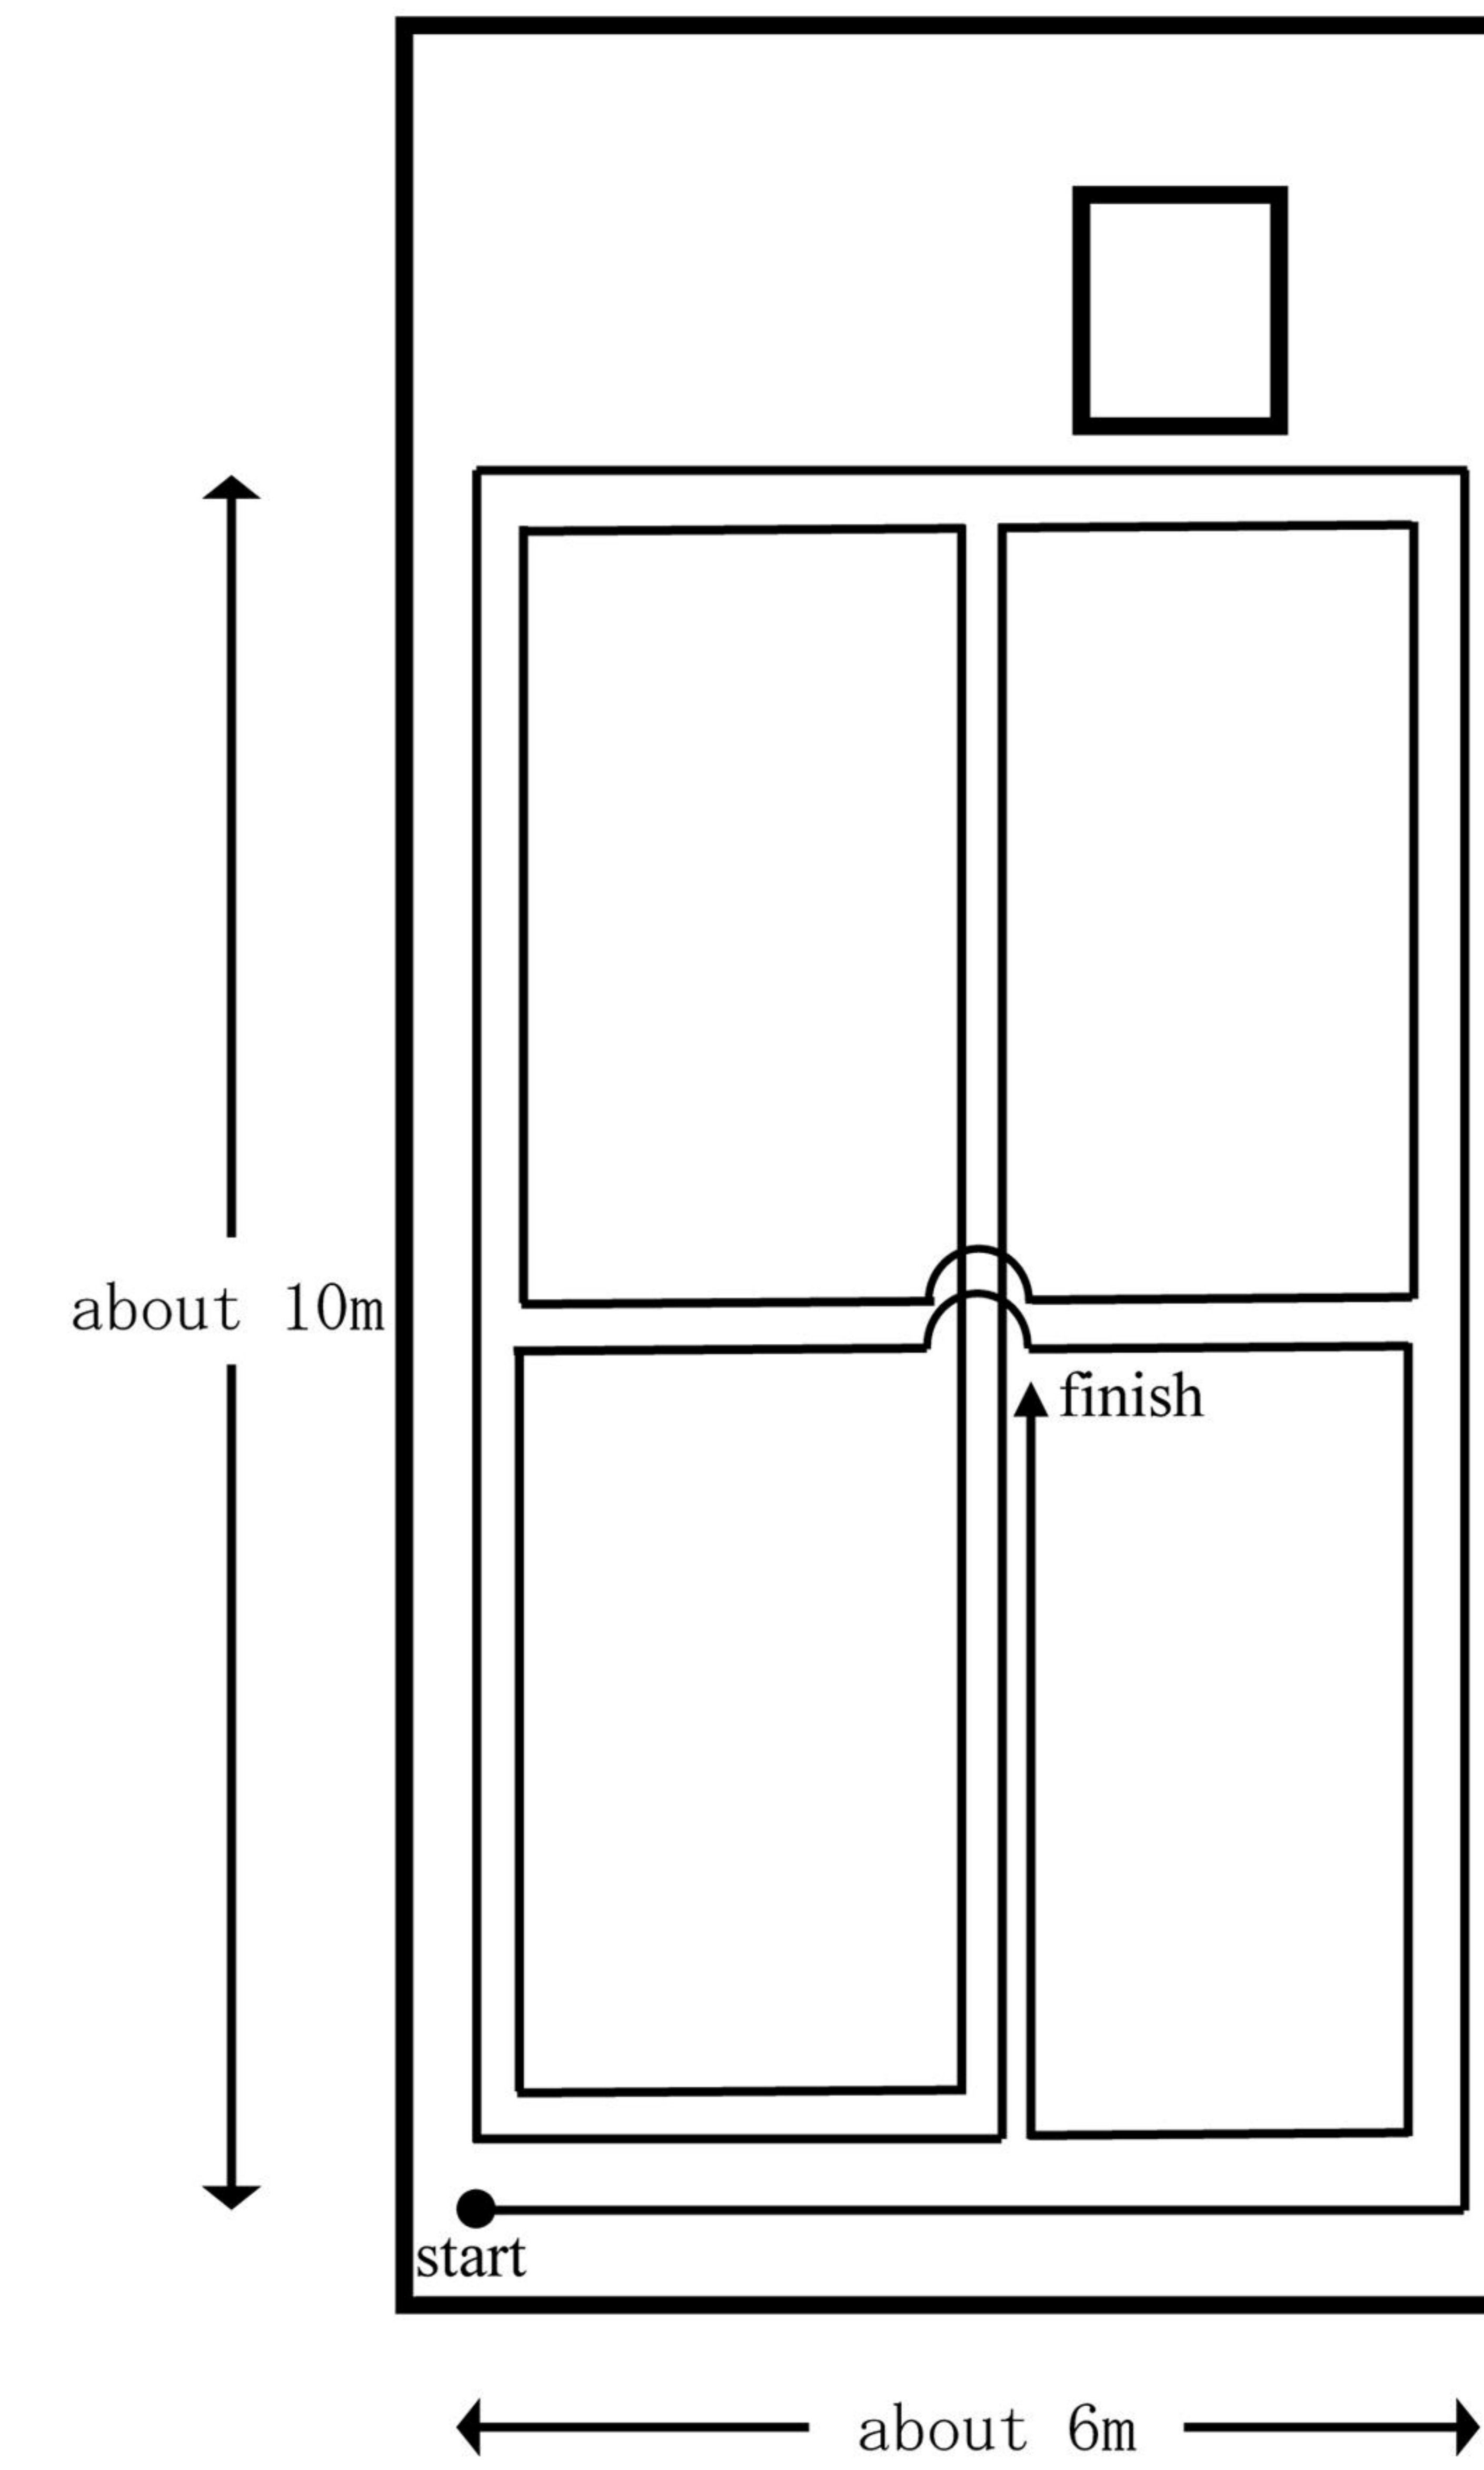

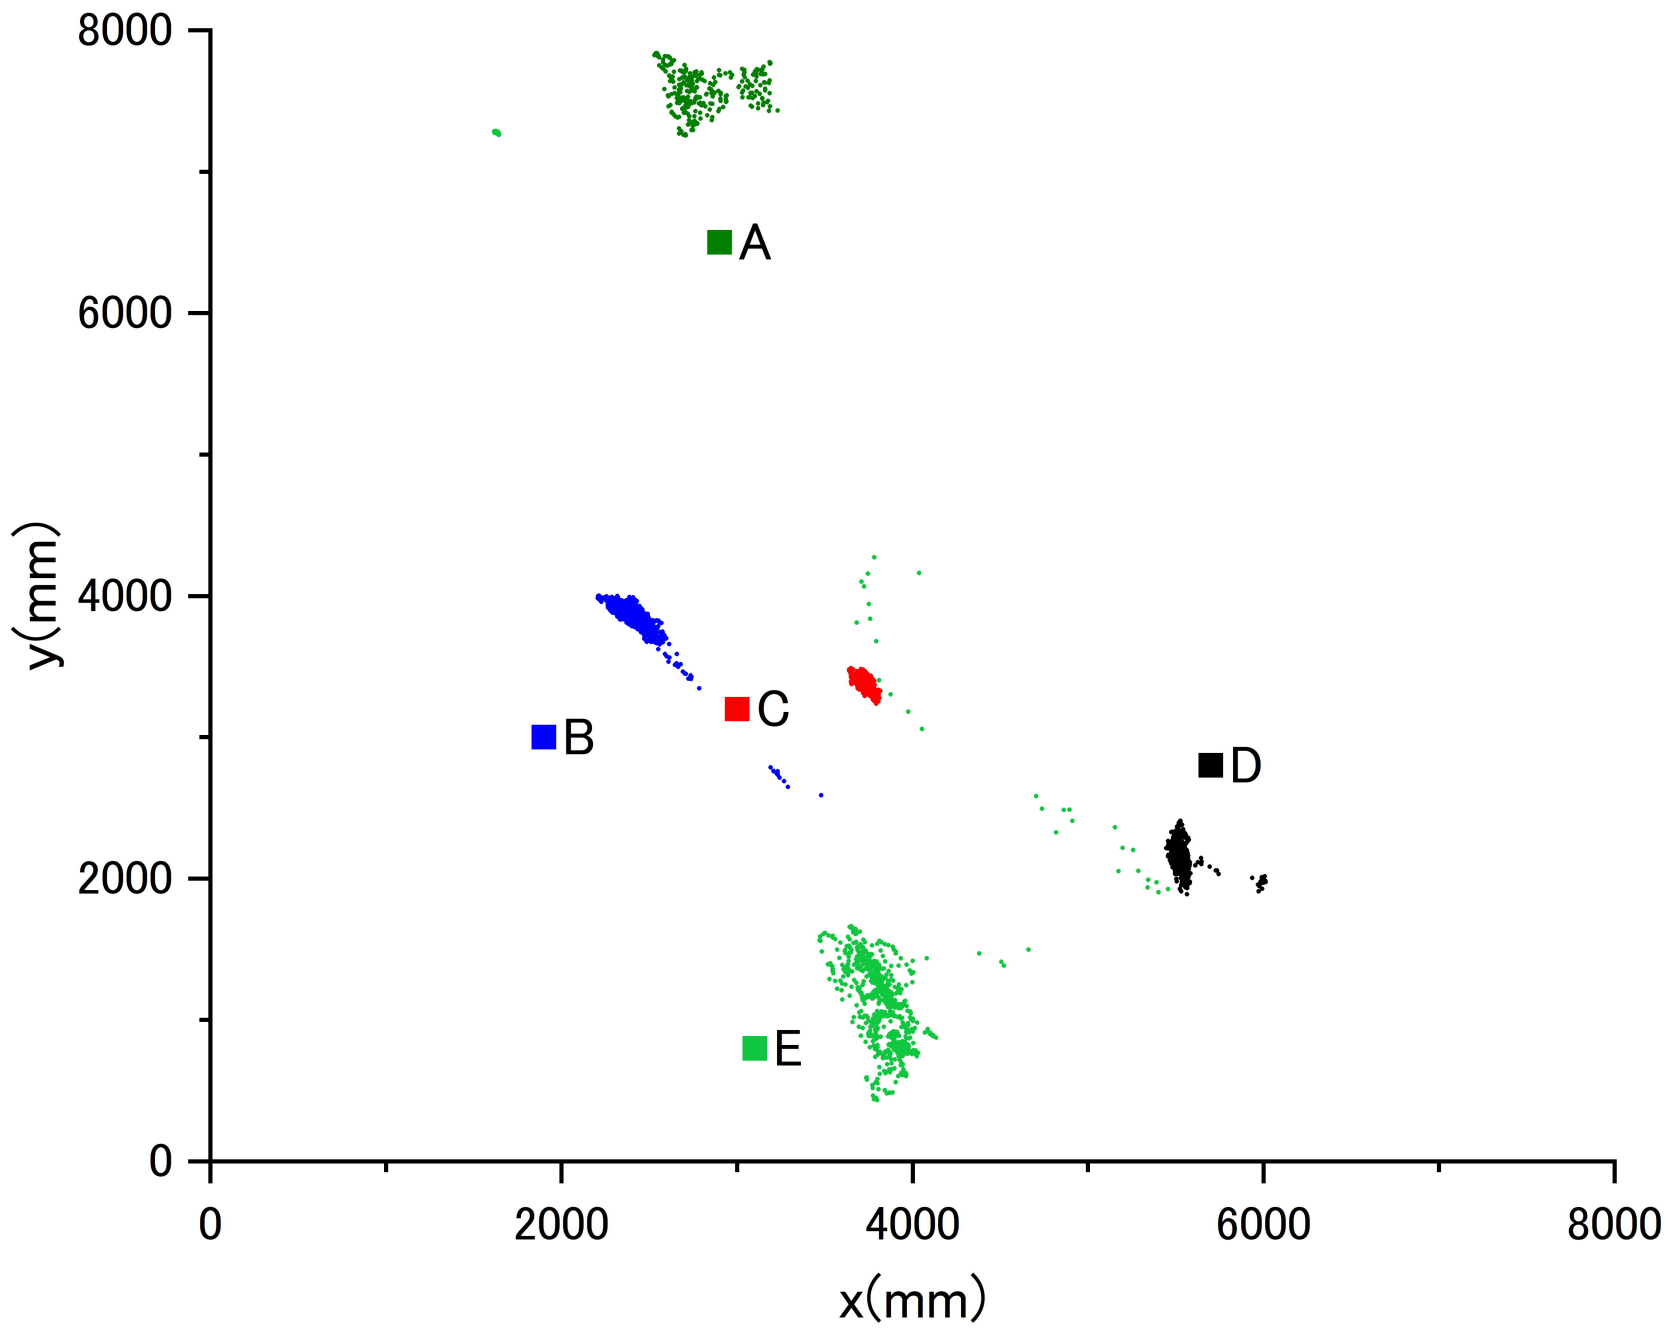

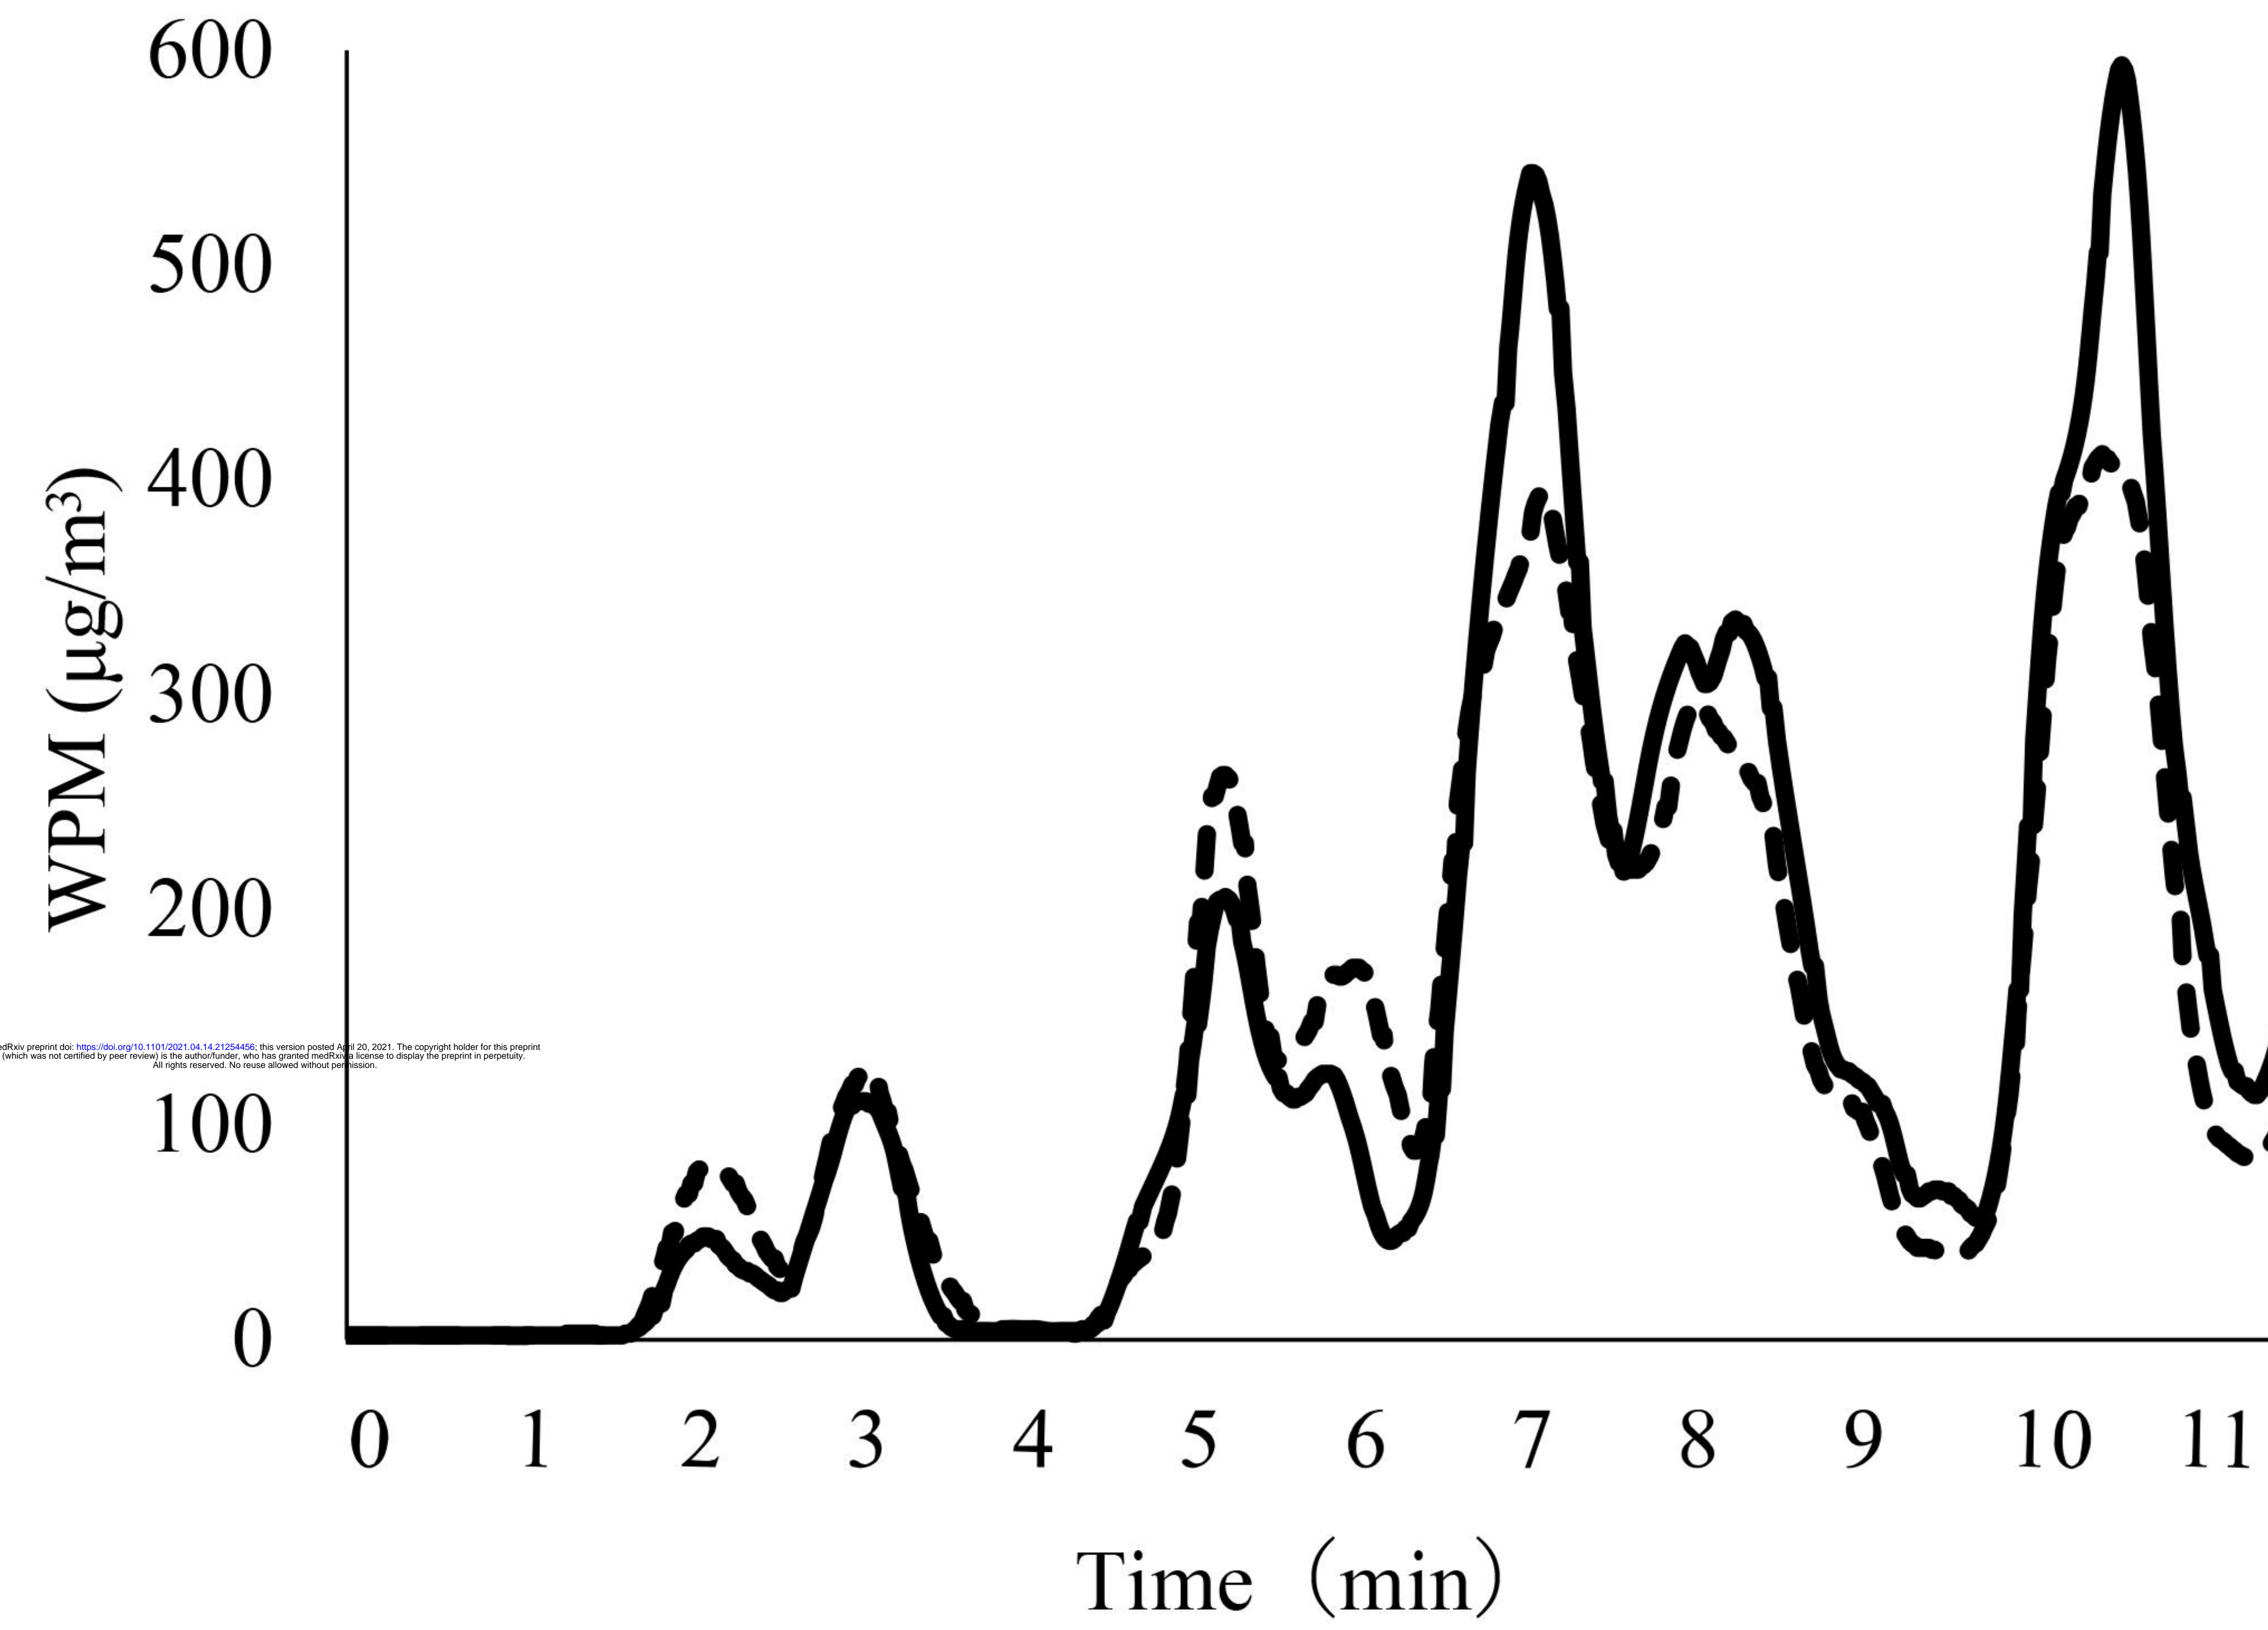

**(A)**

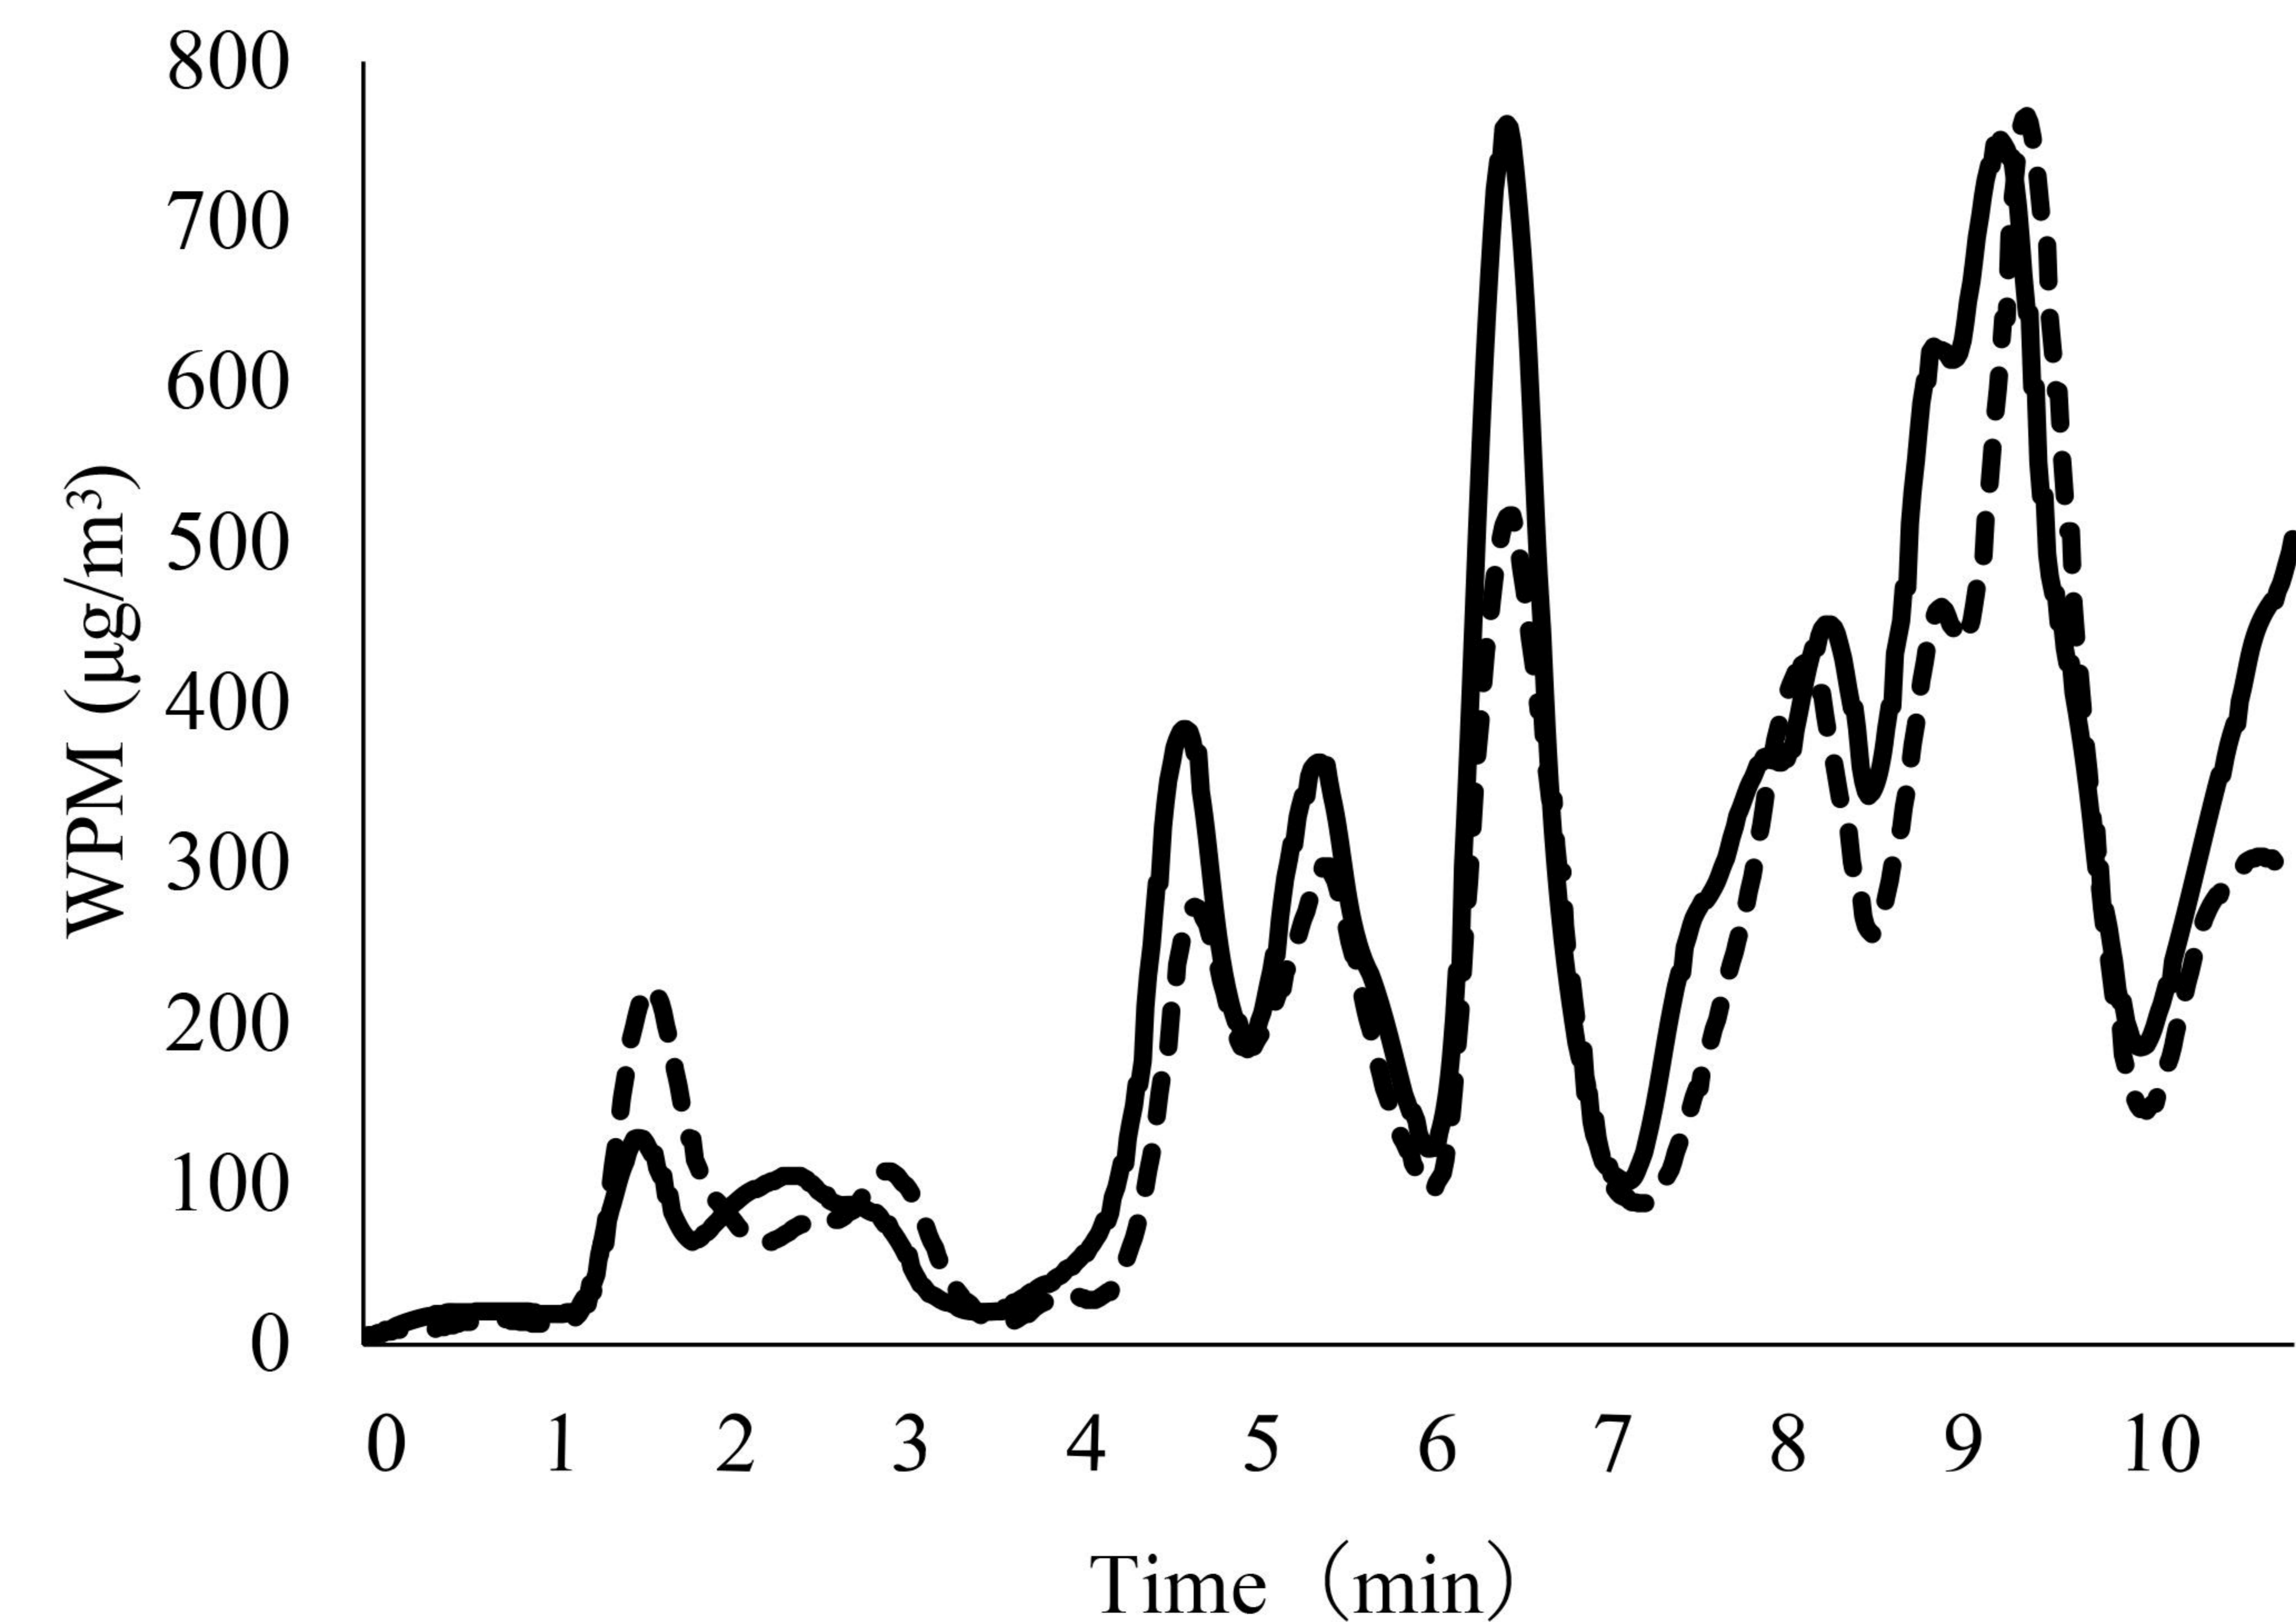

**(B)**

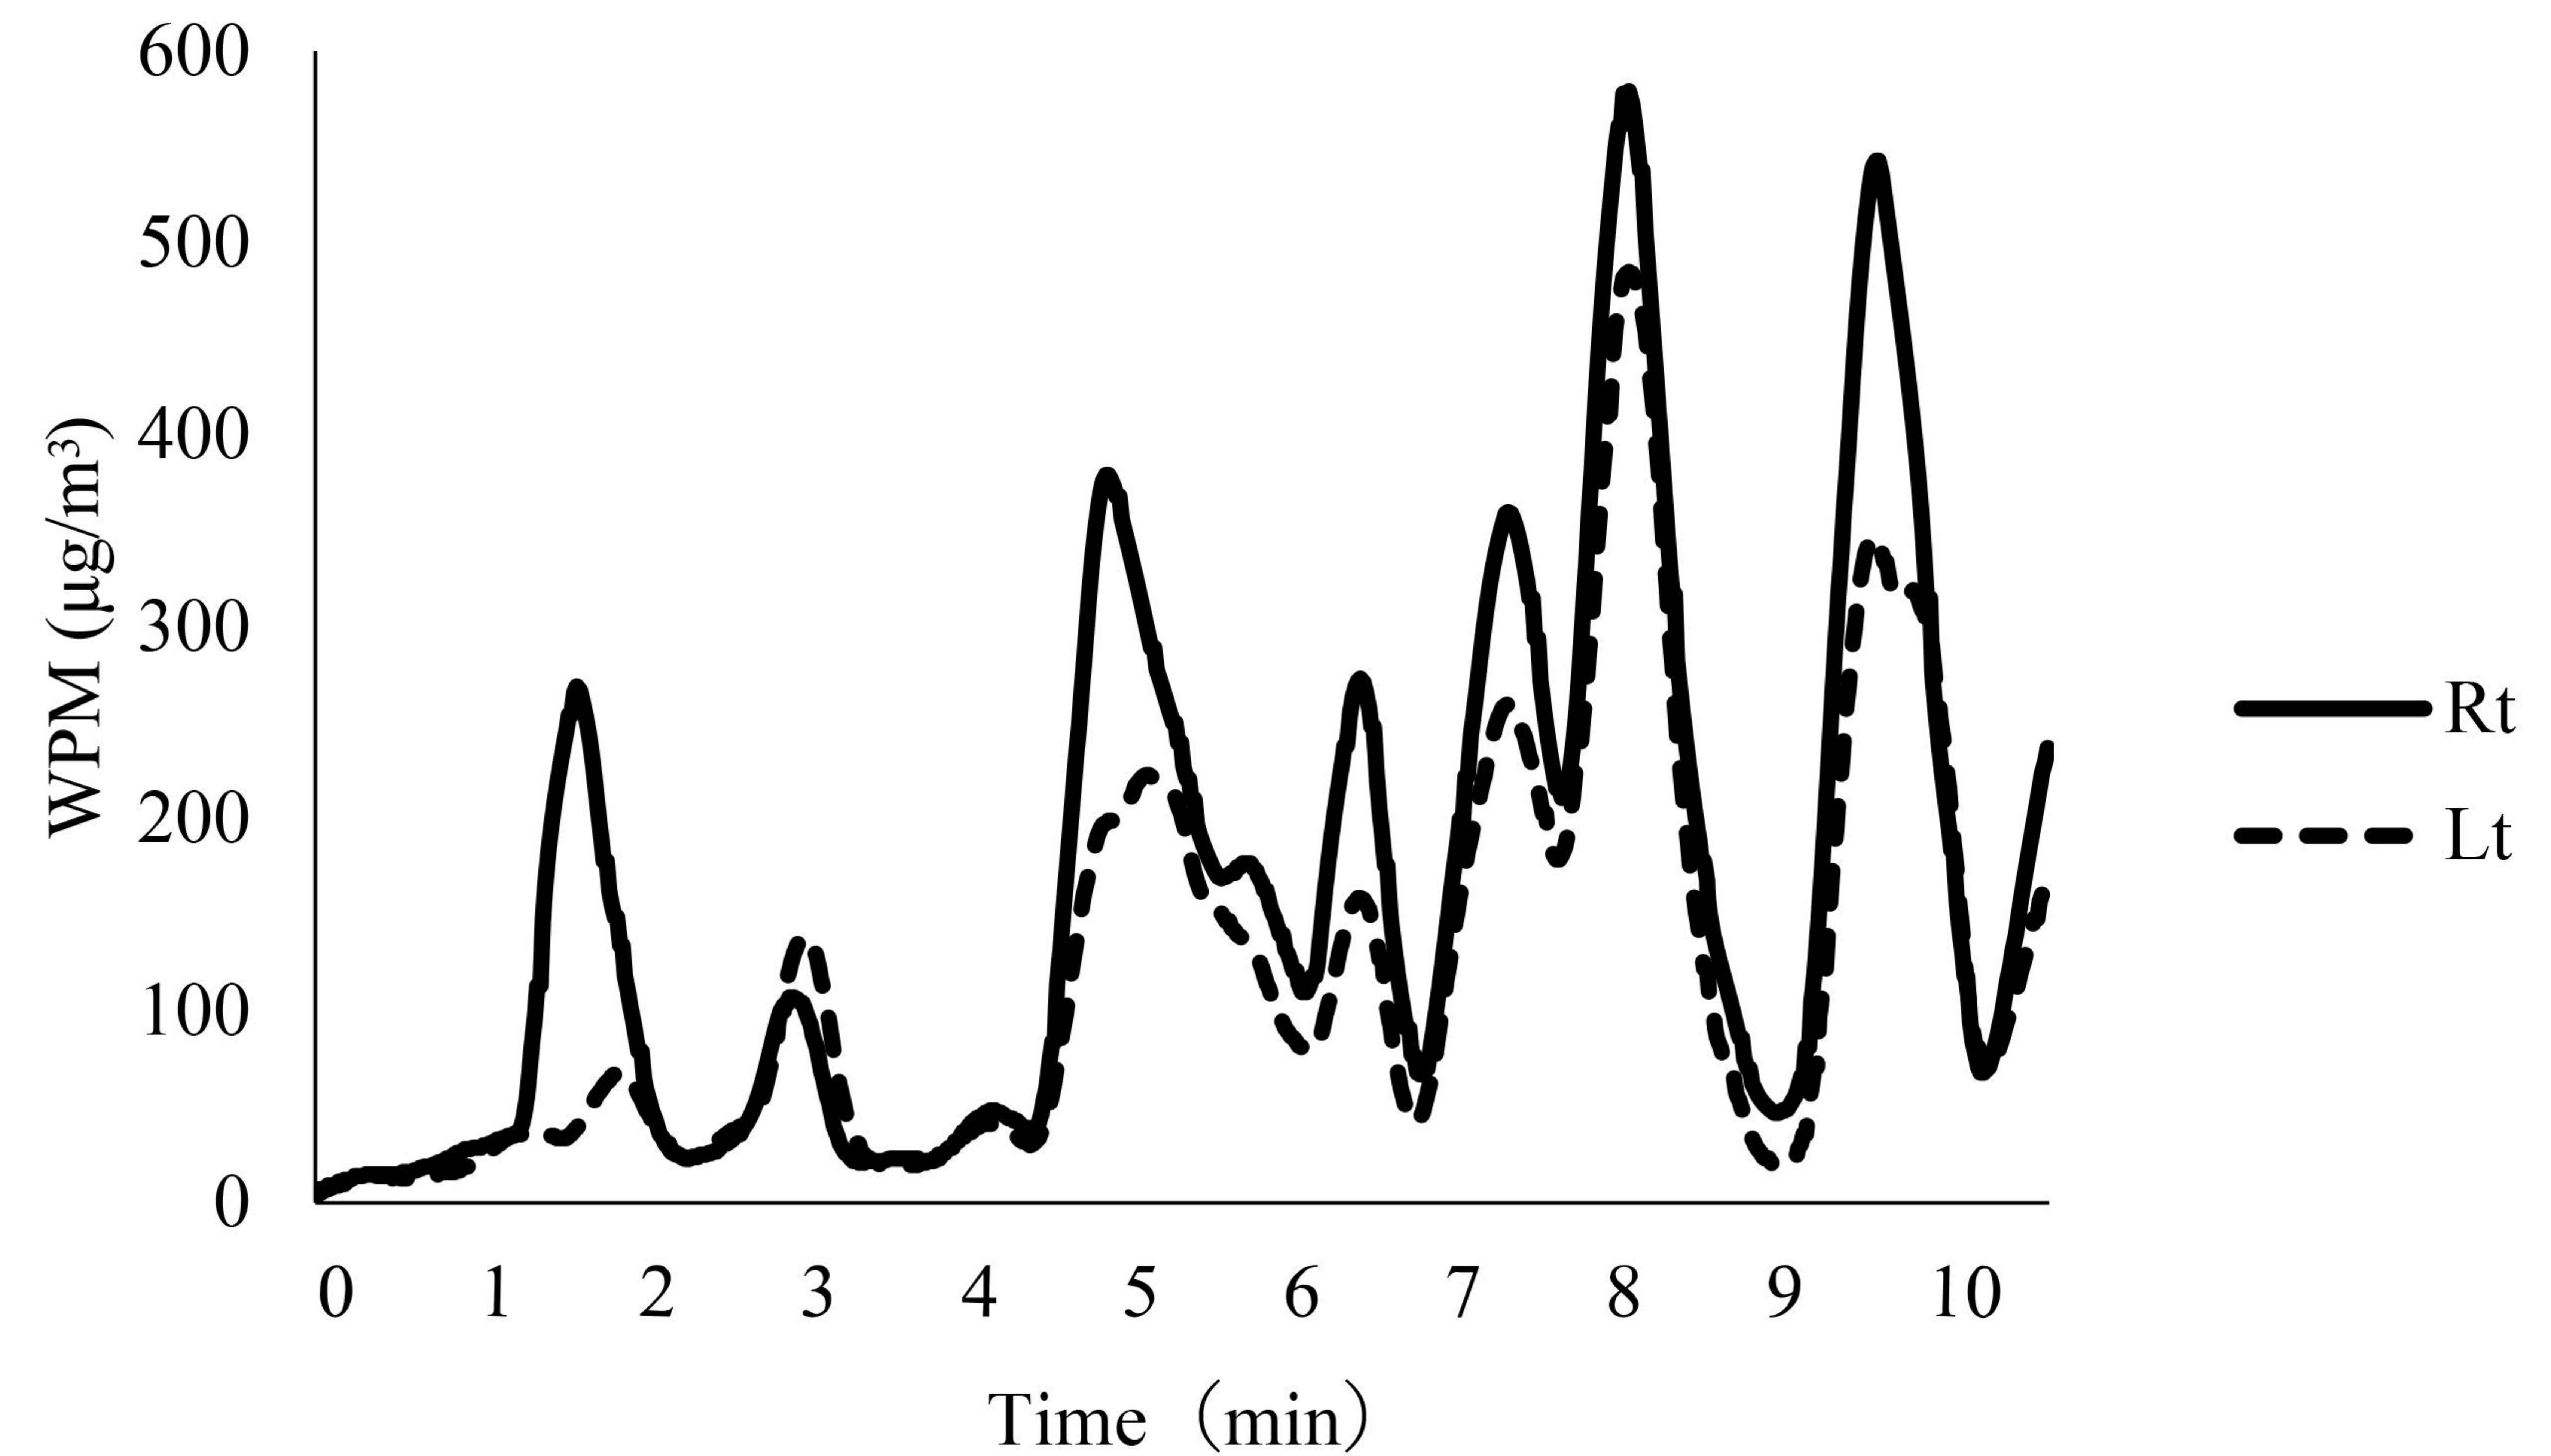

**(C)**

— Rt  
- - Lt

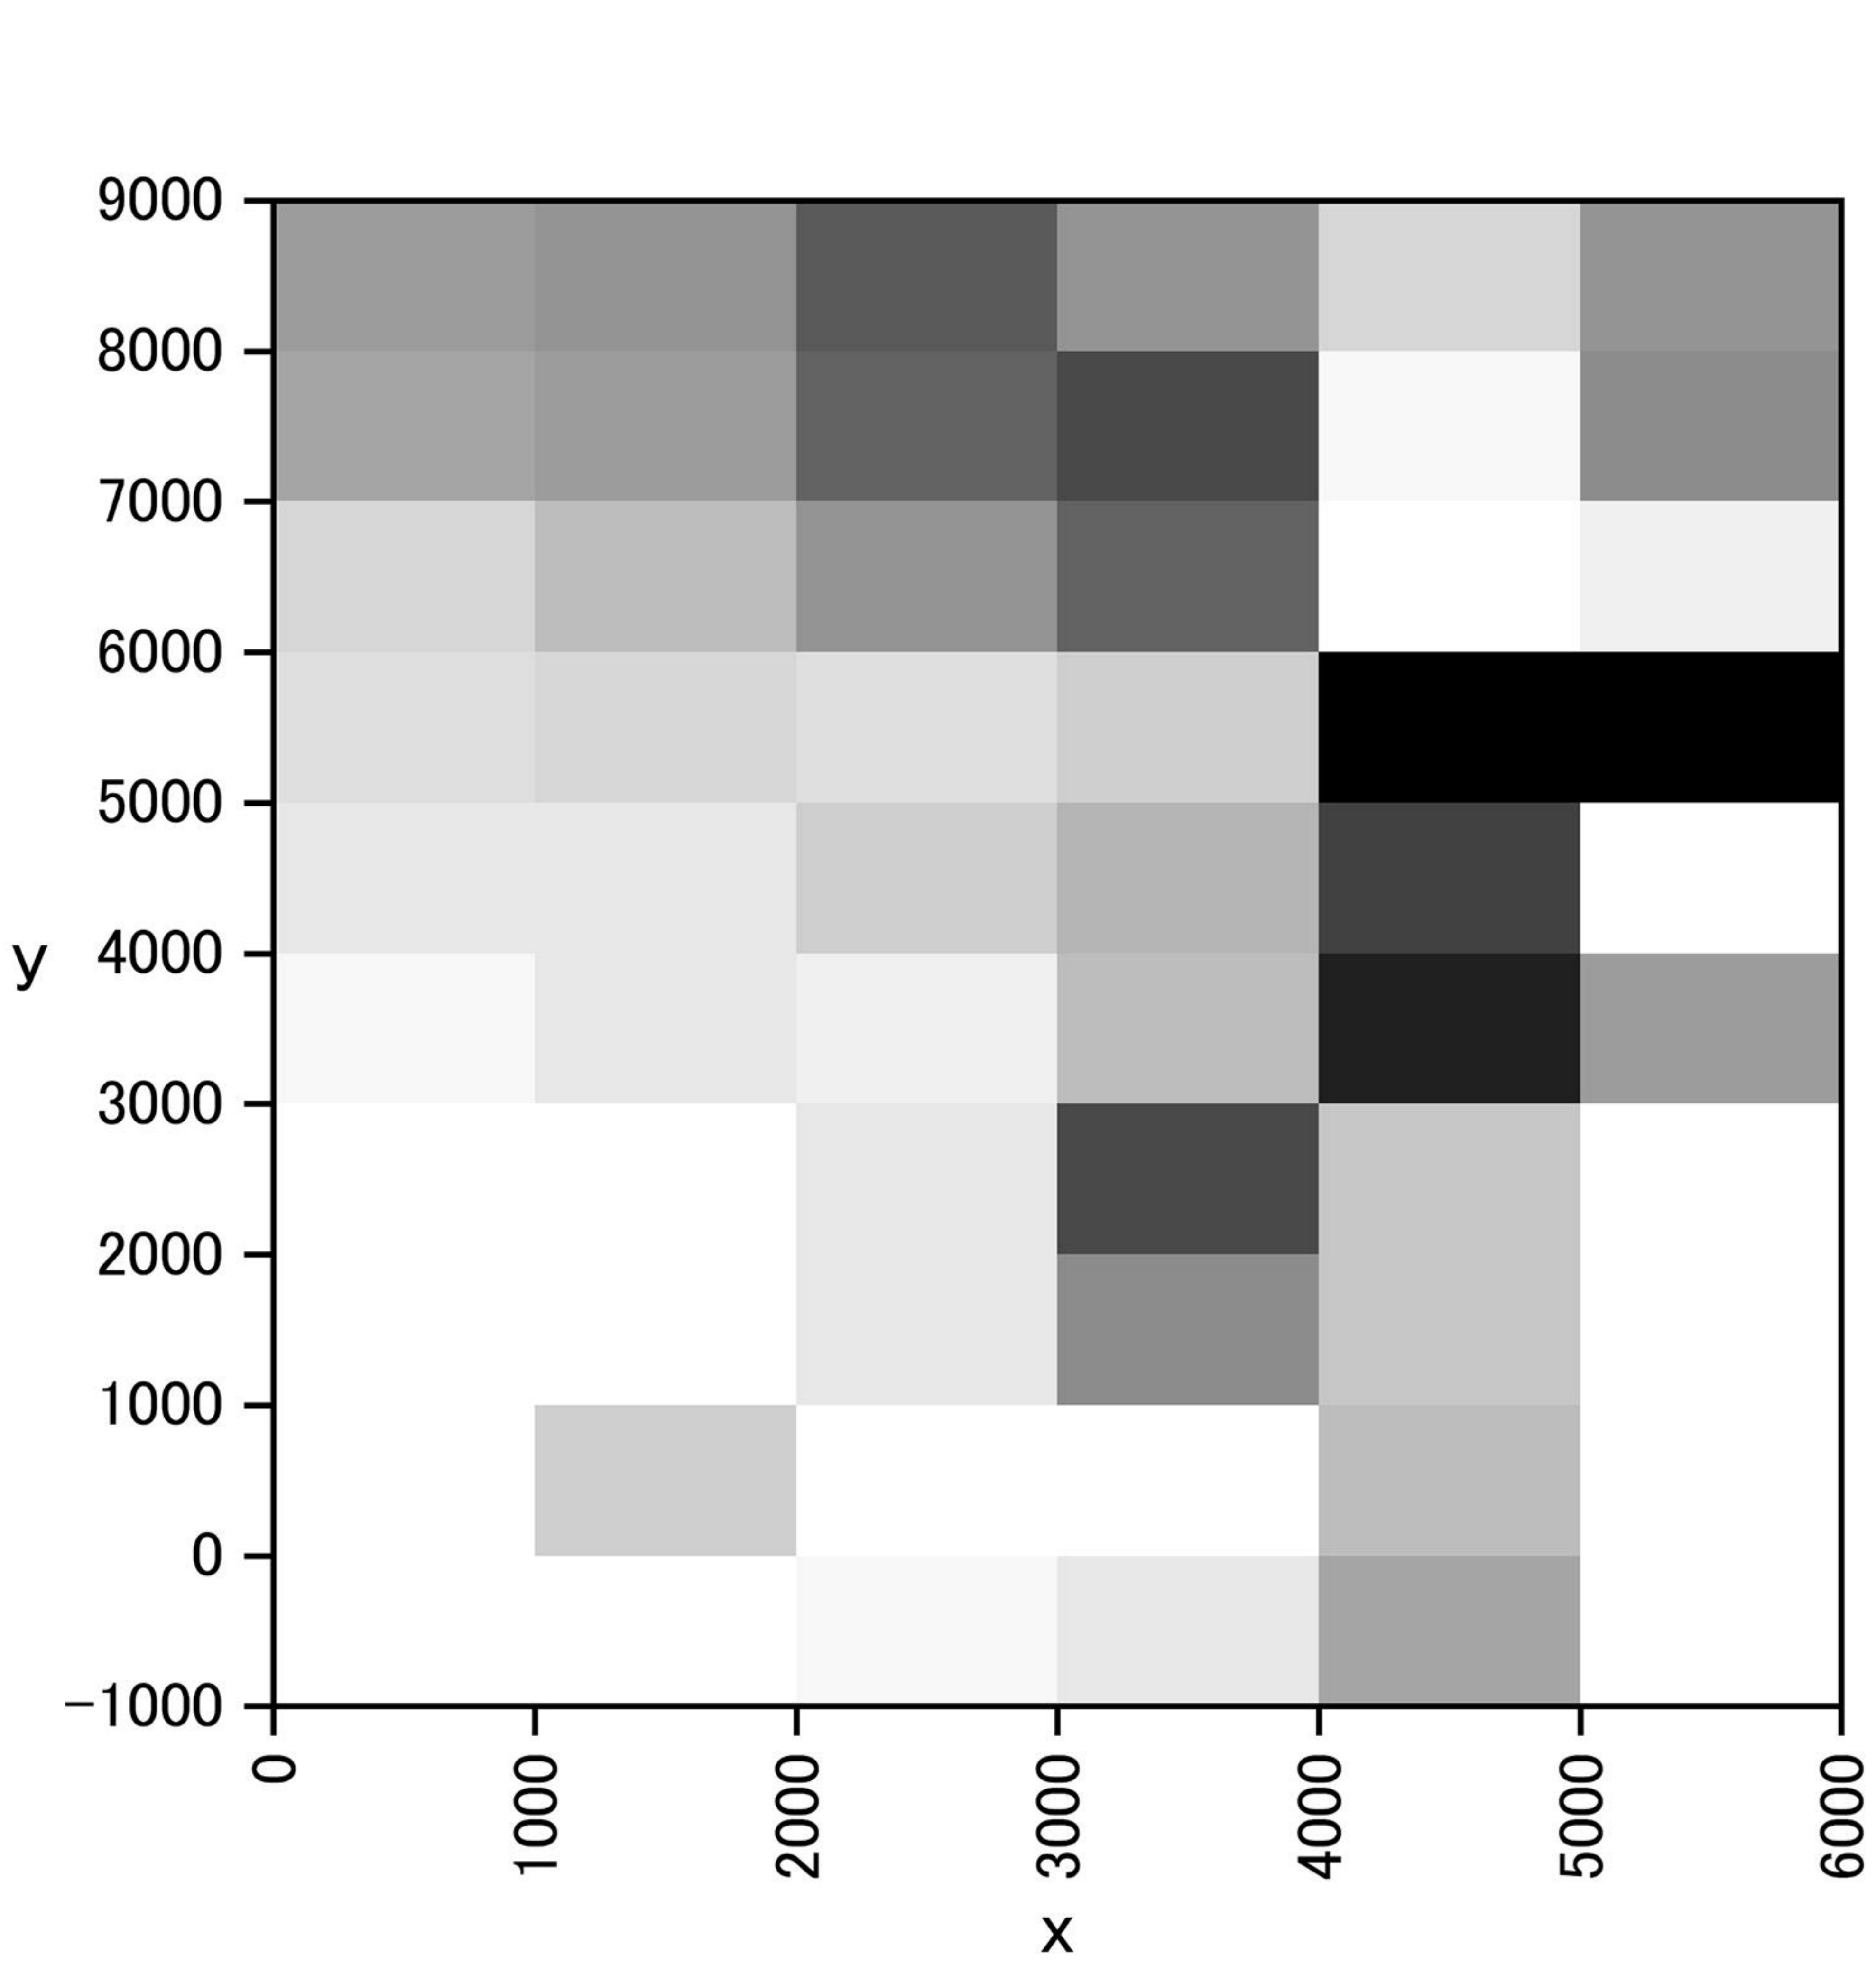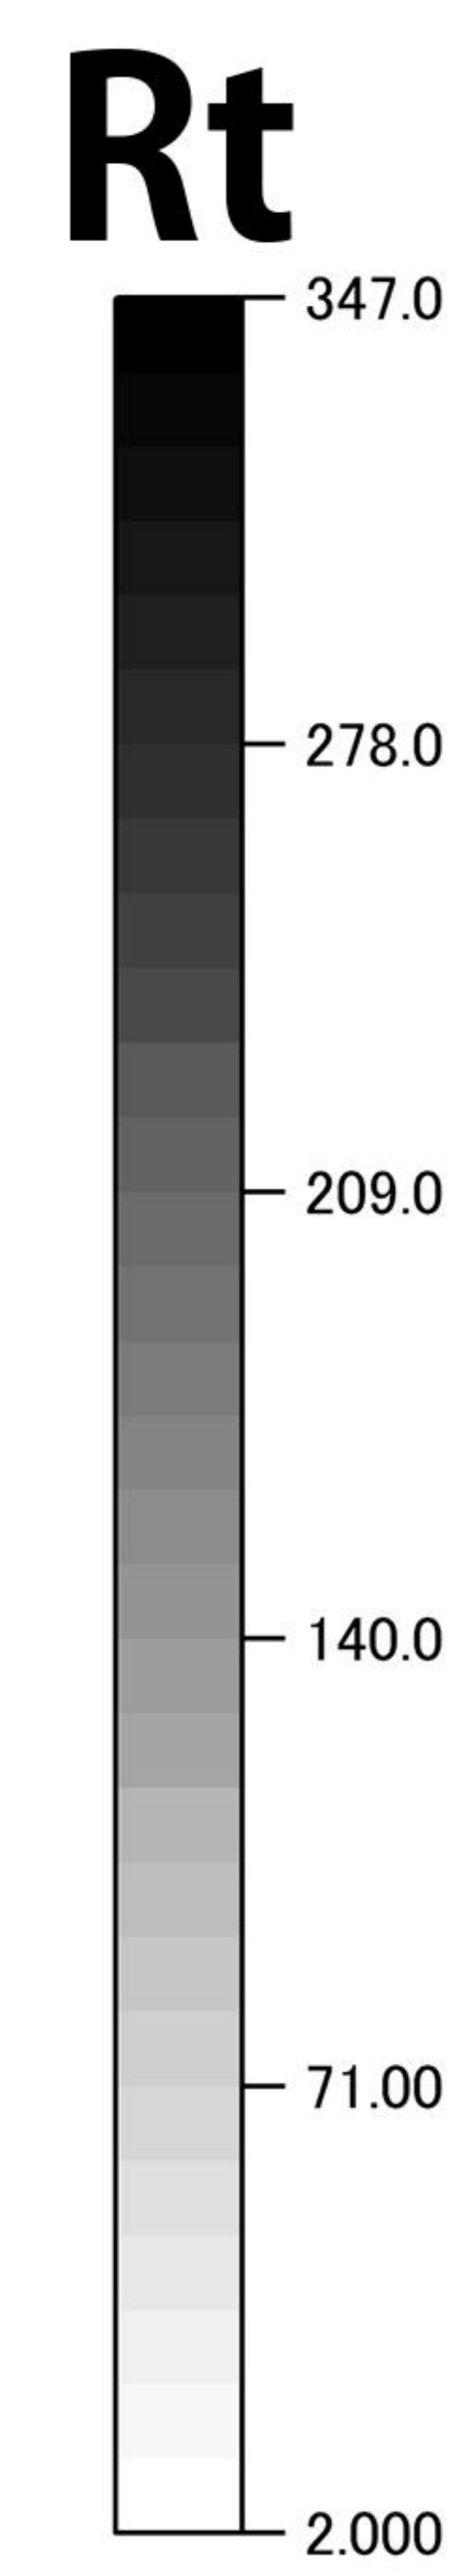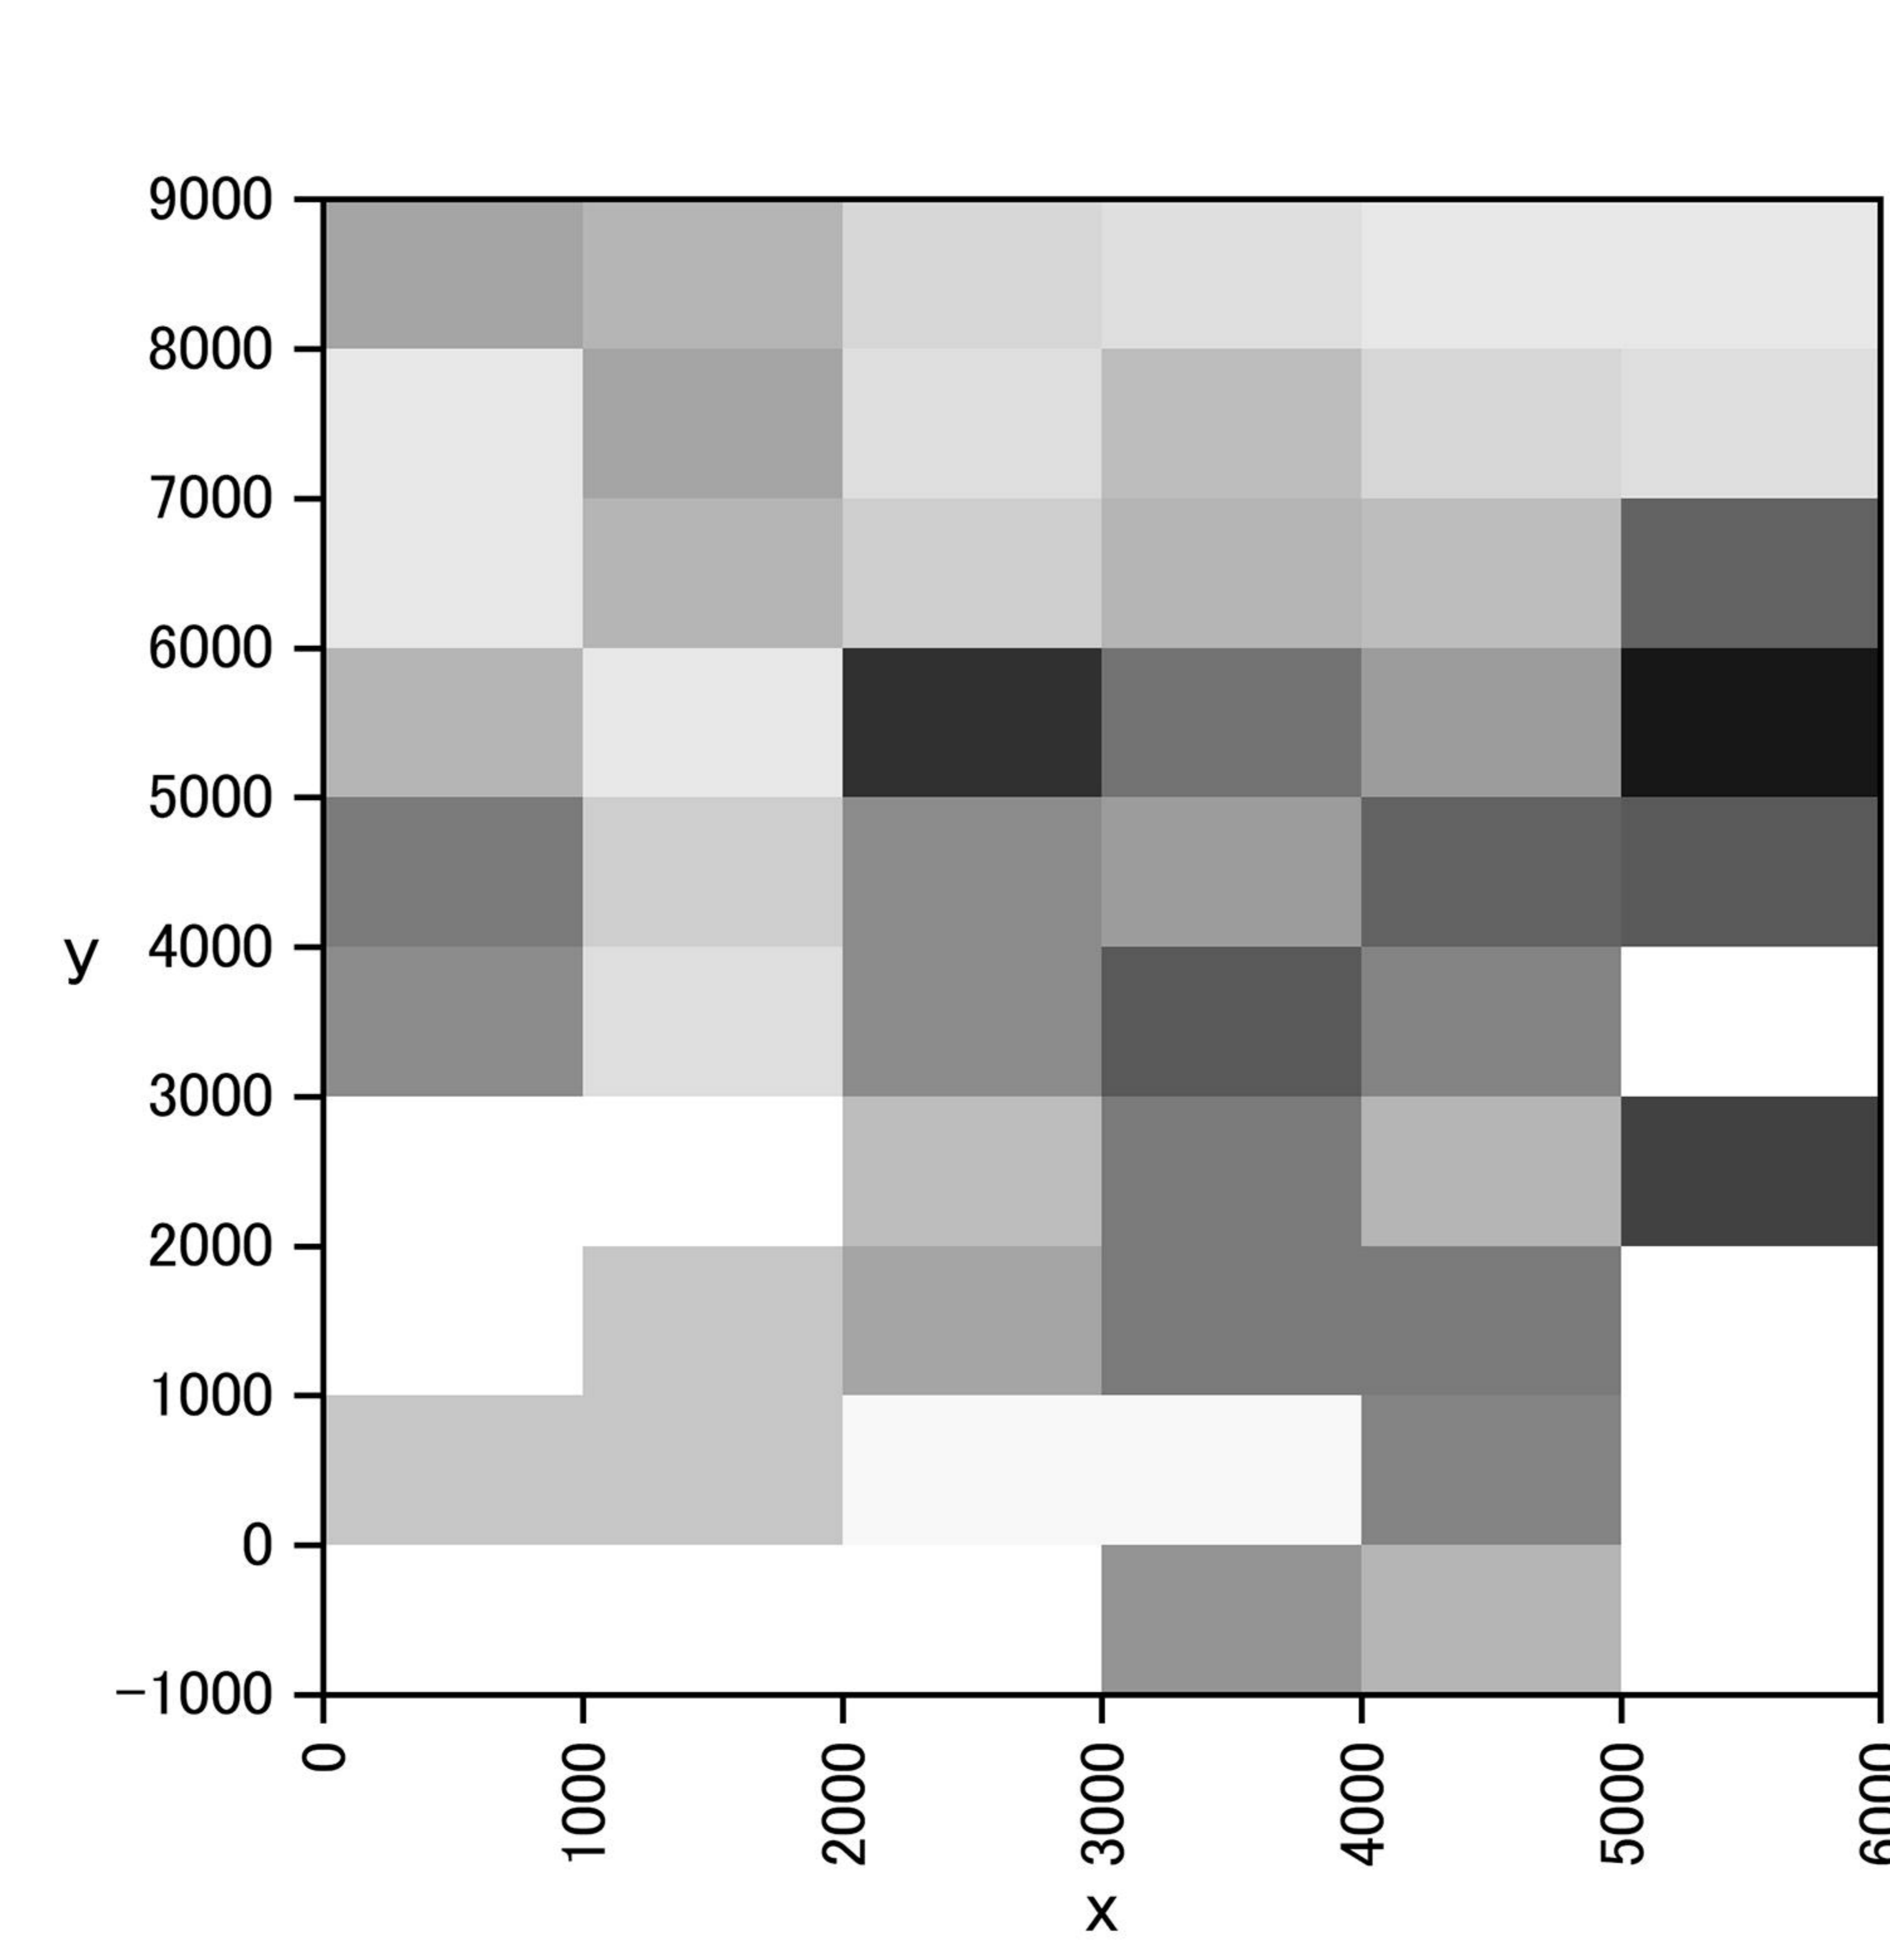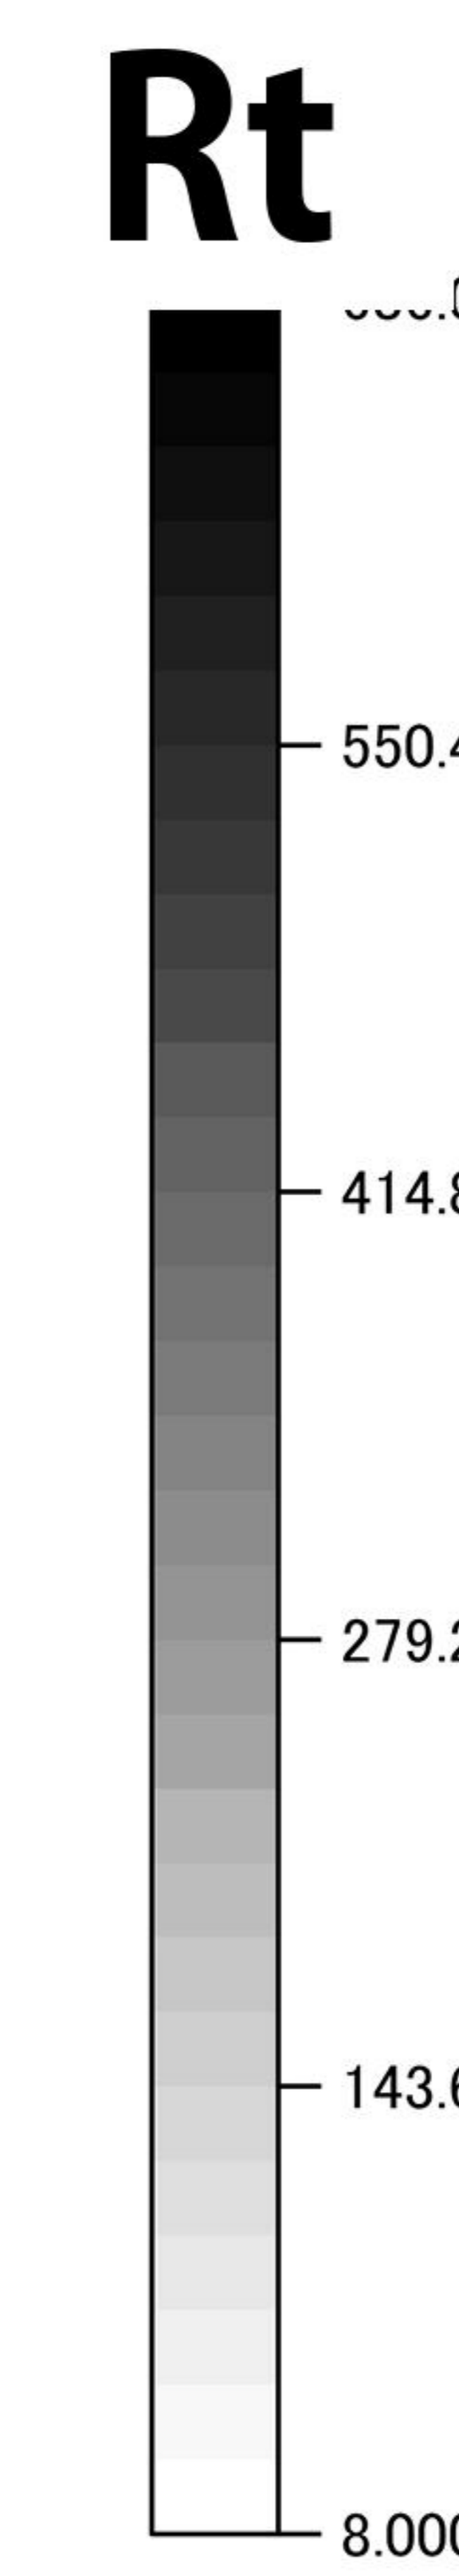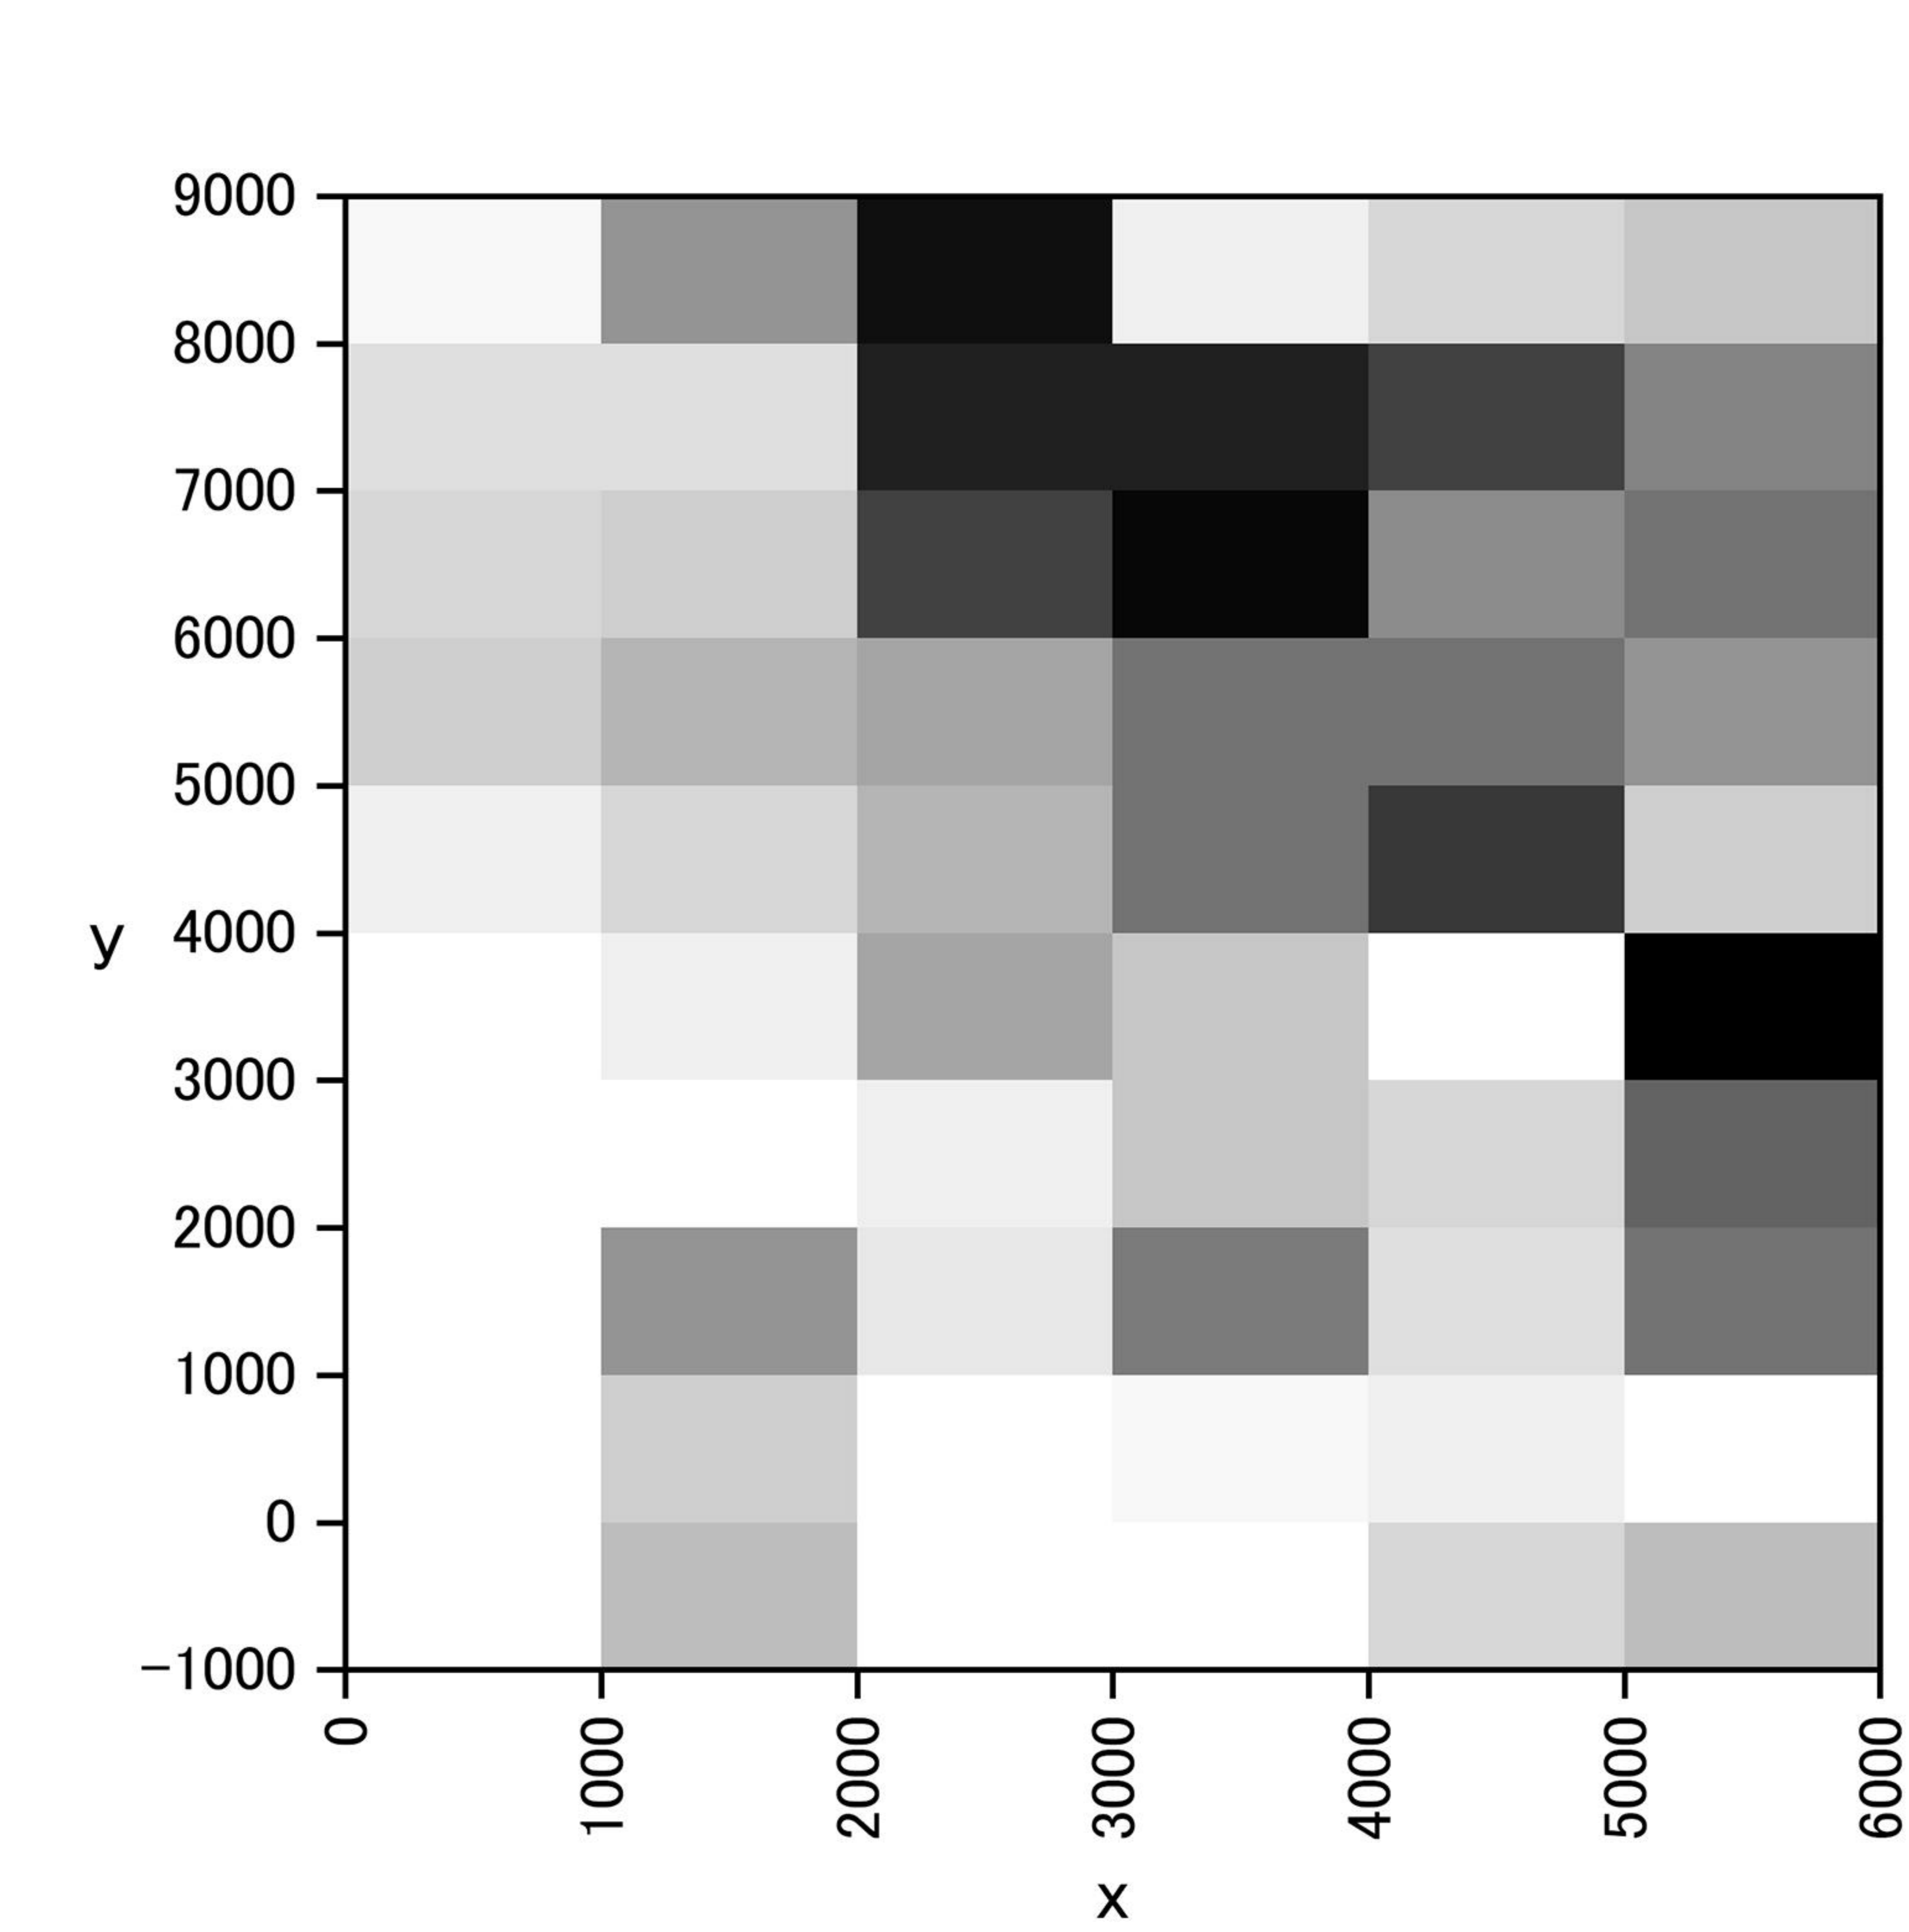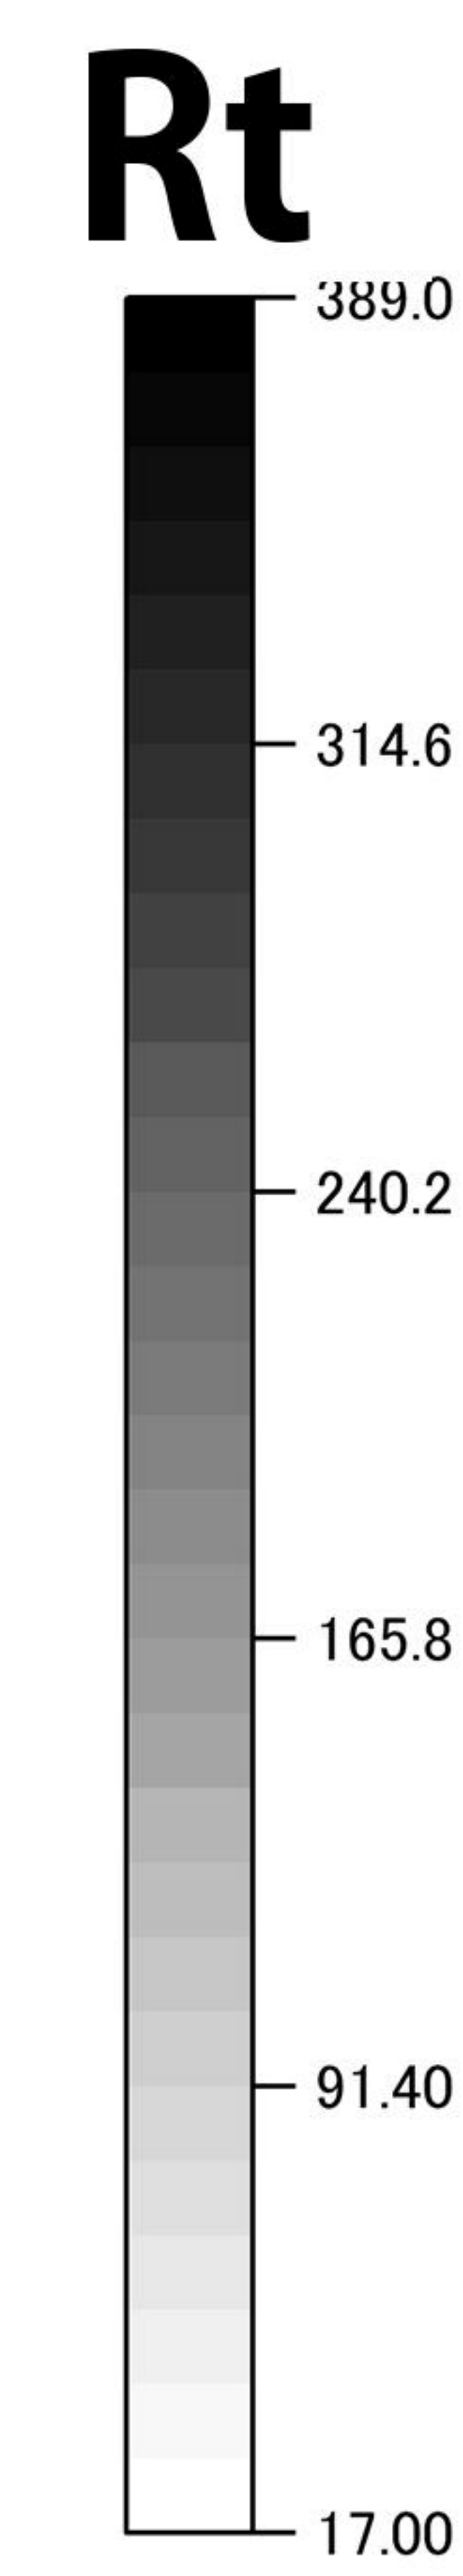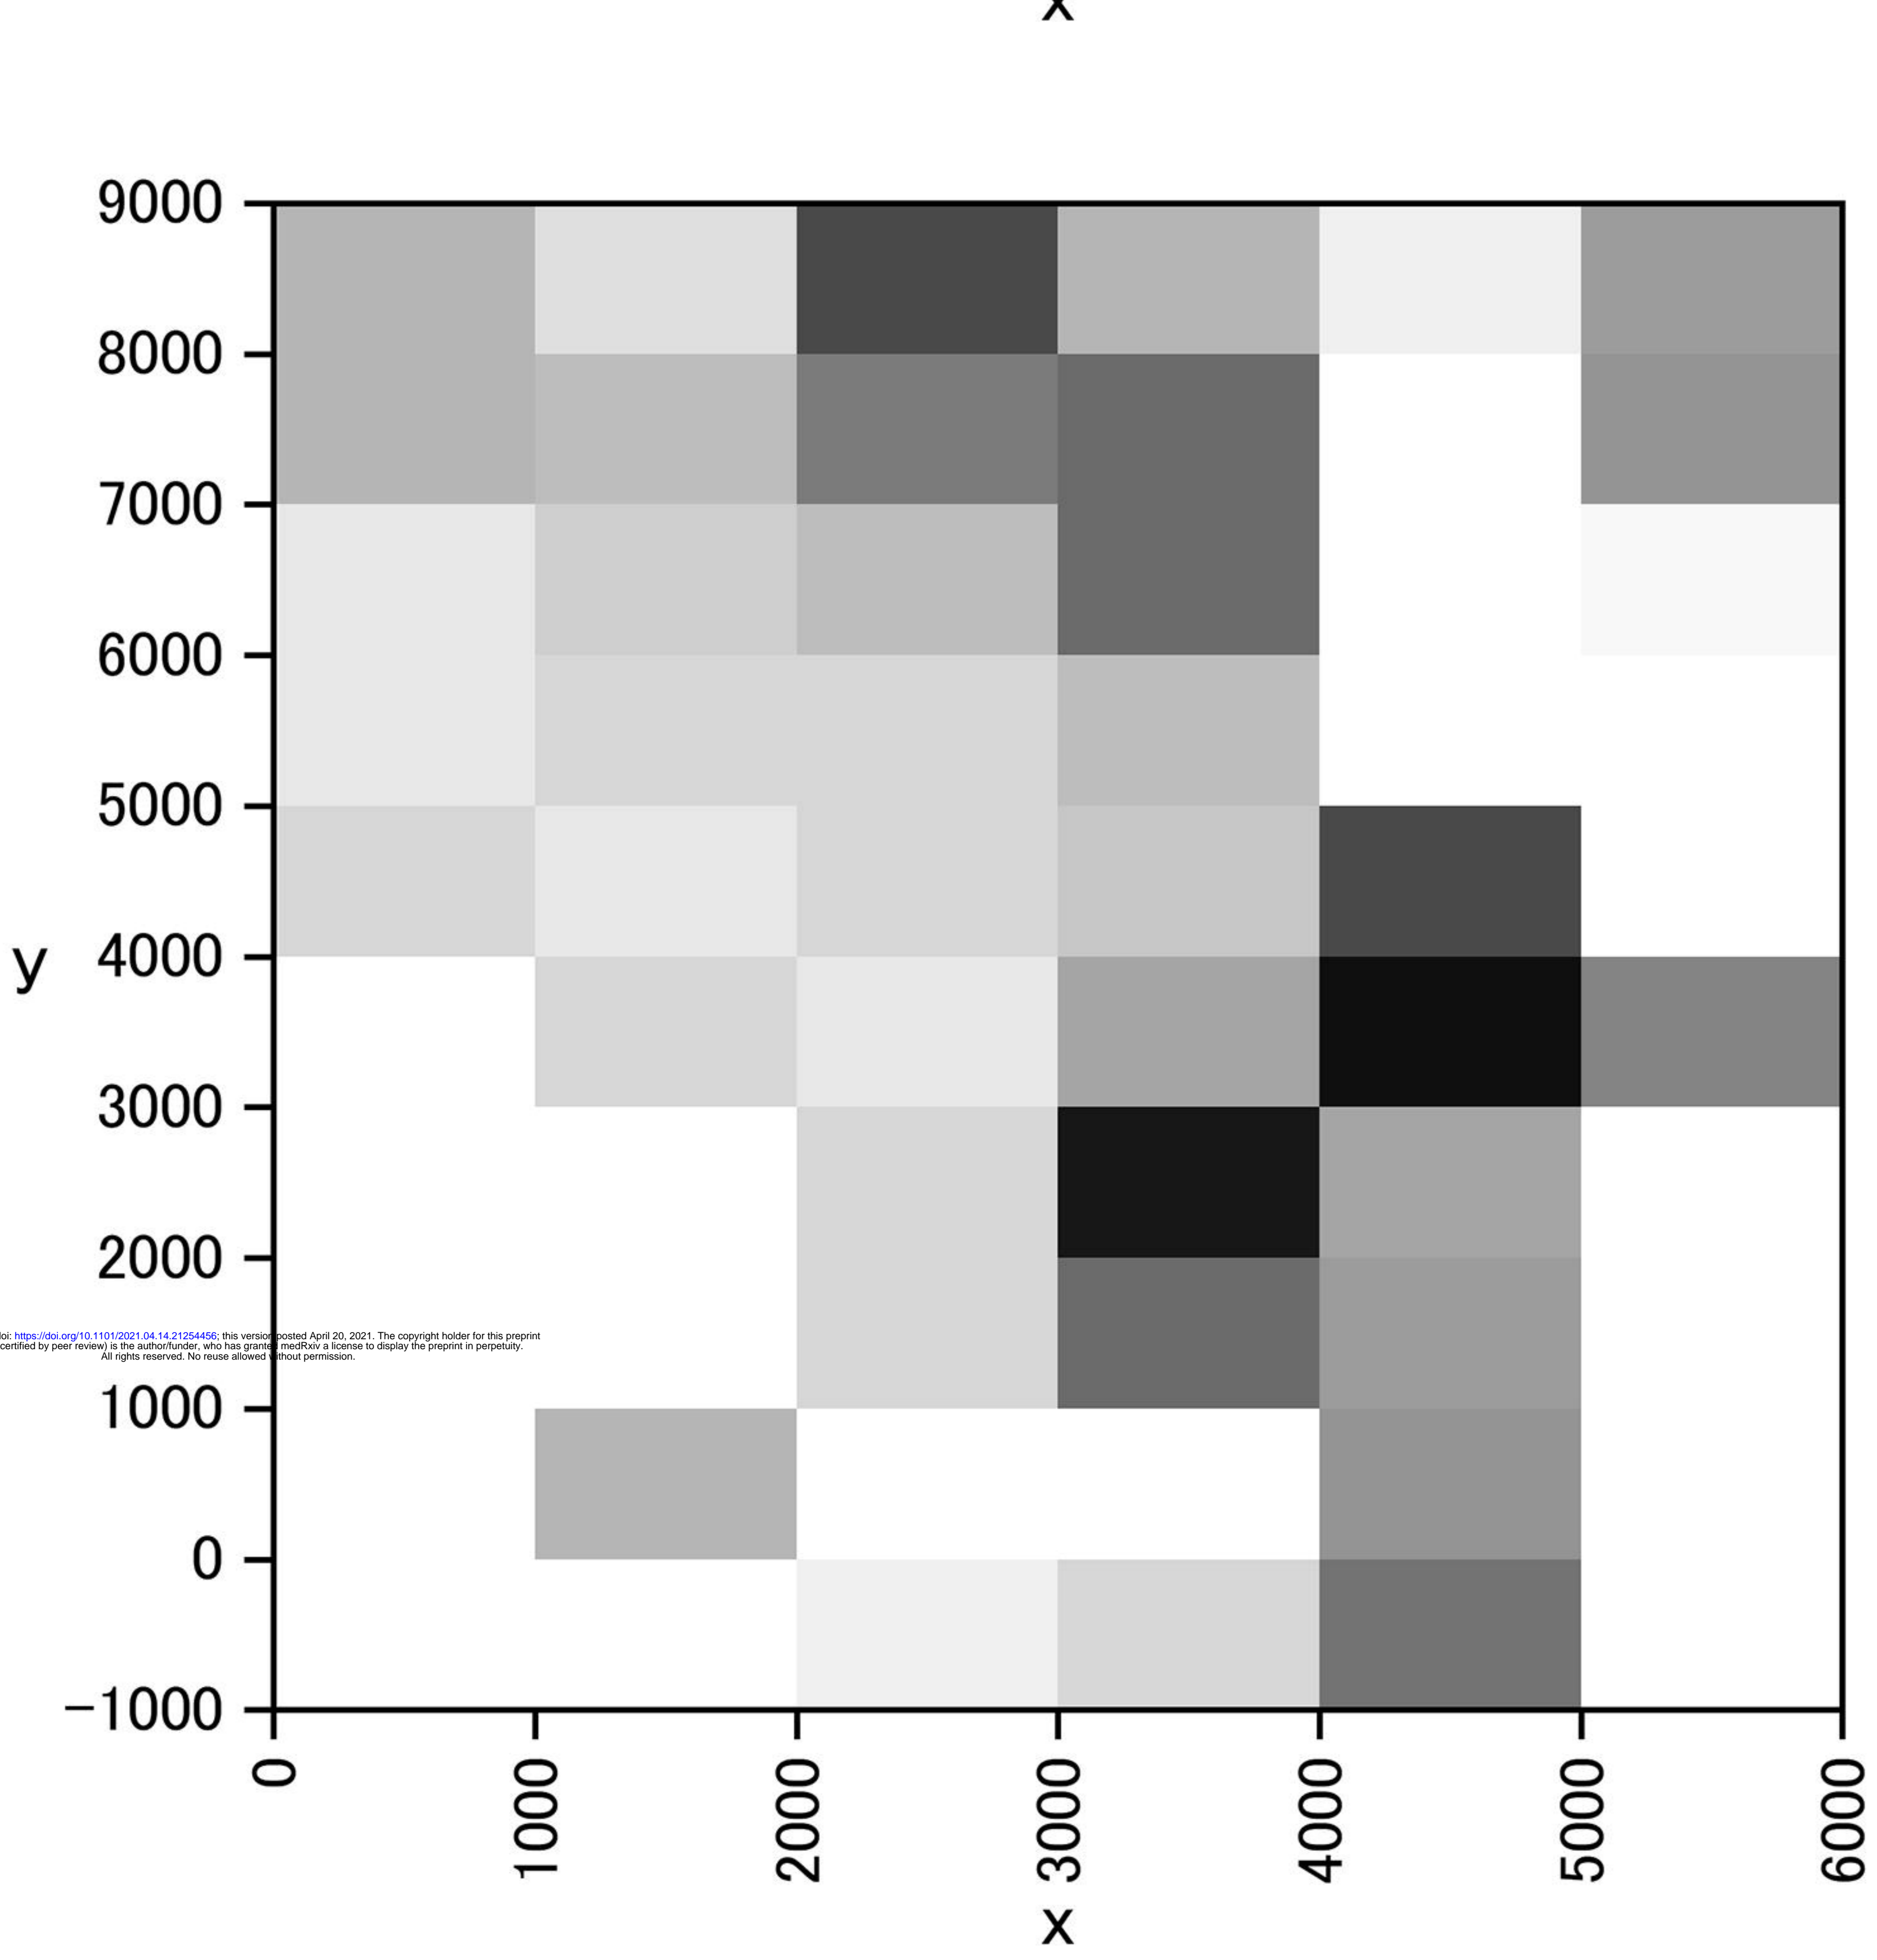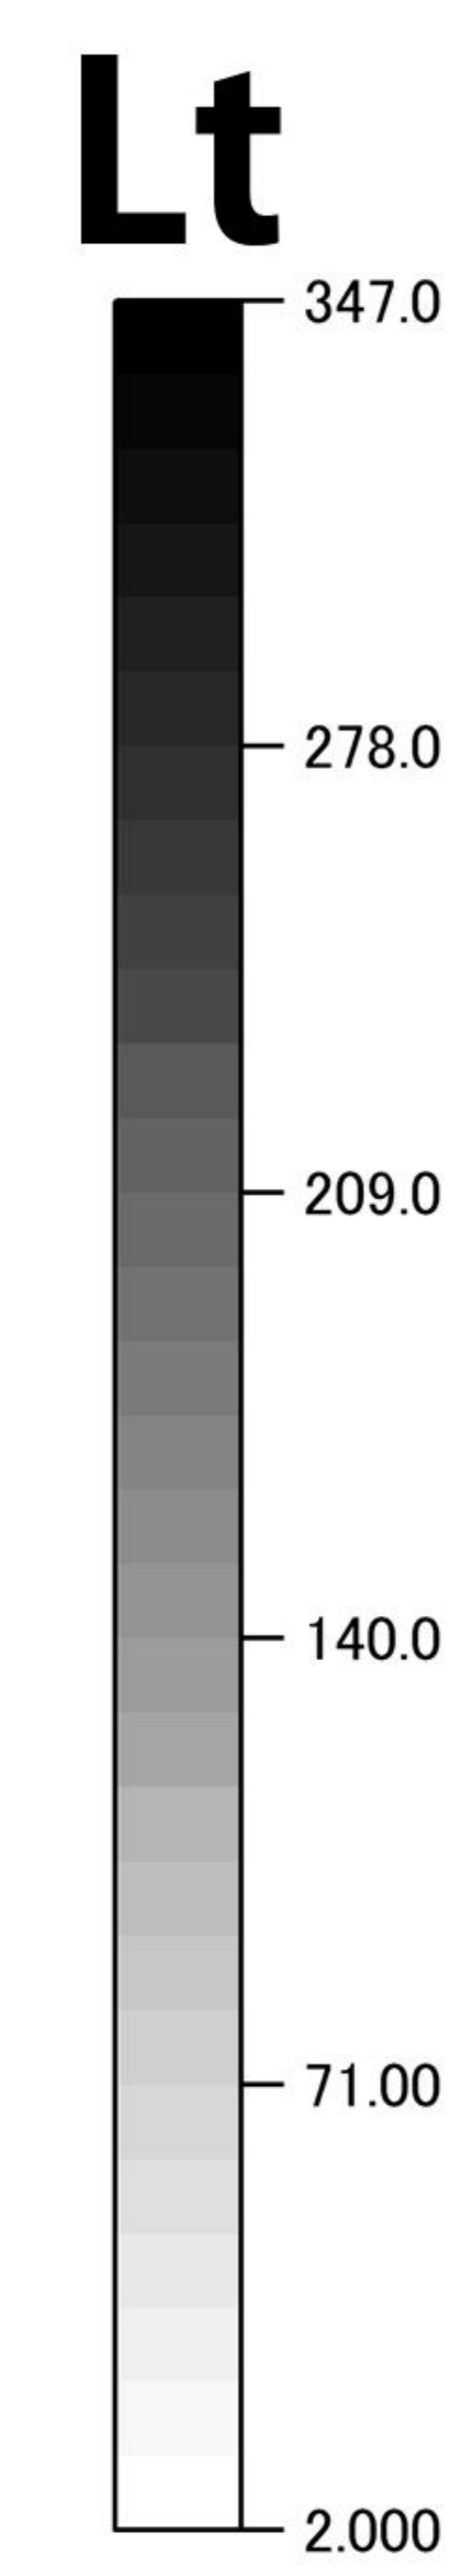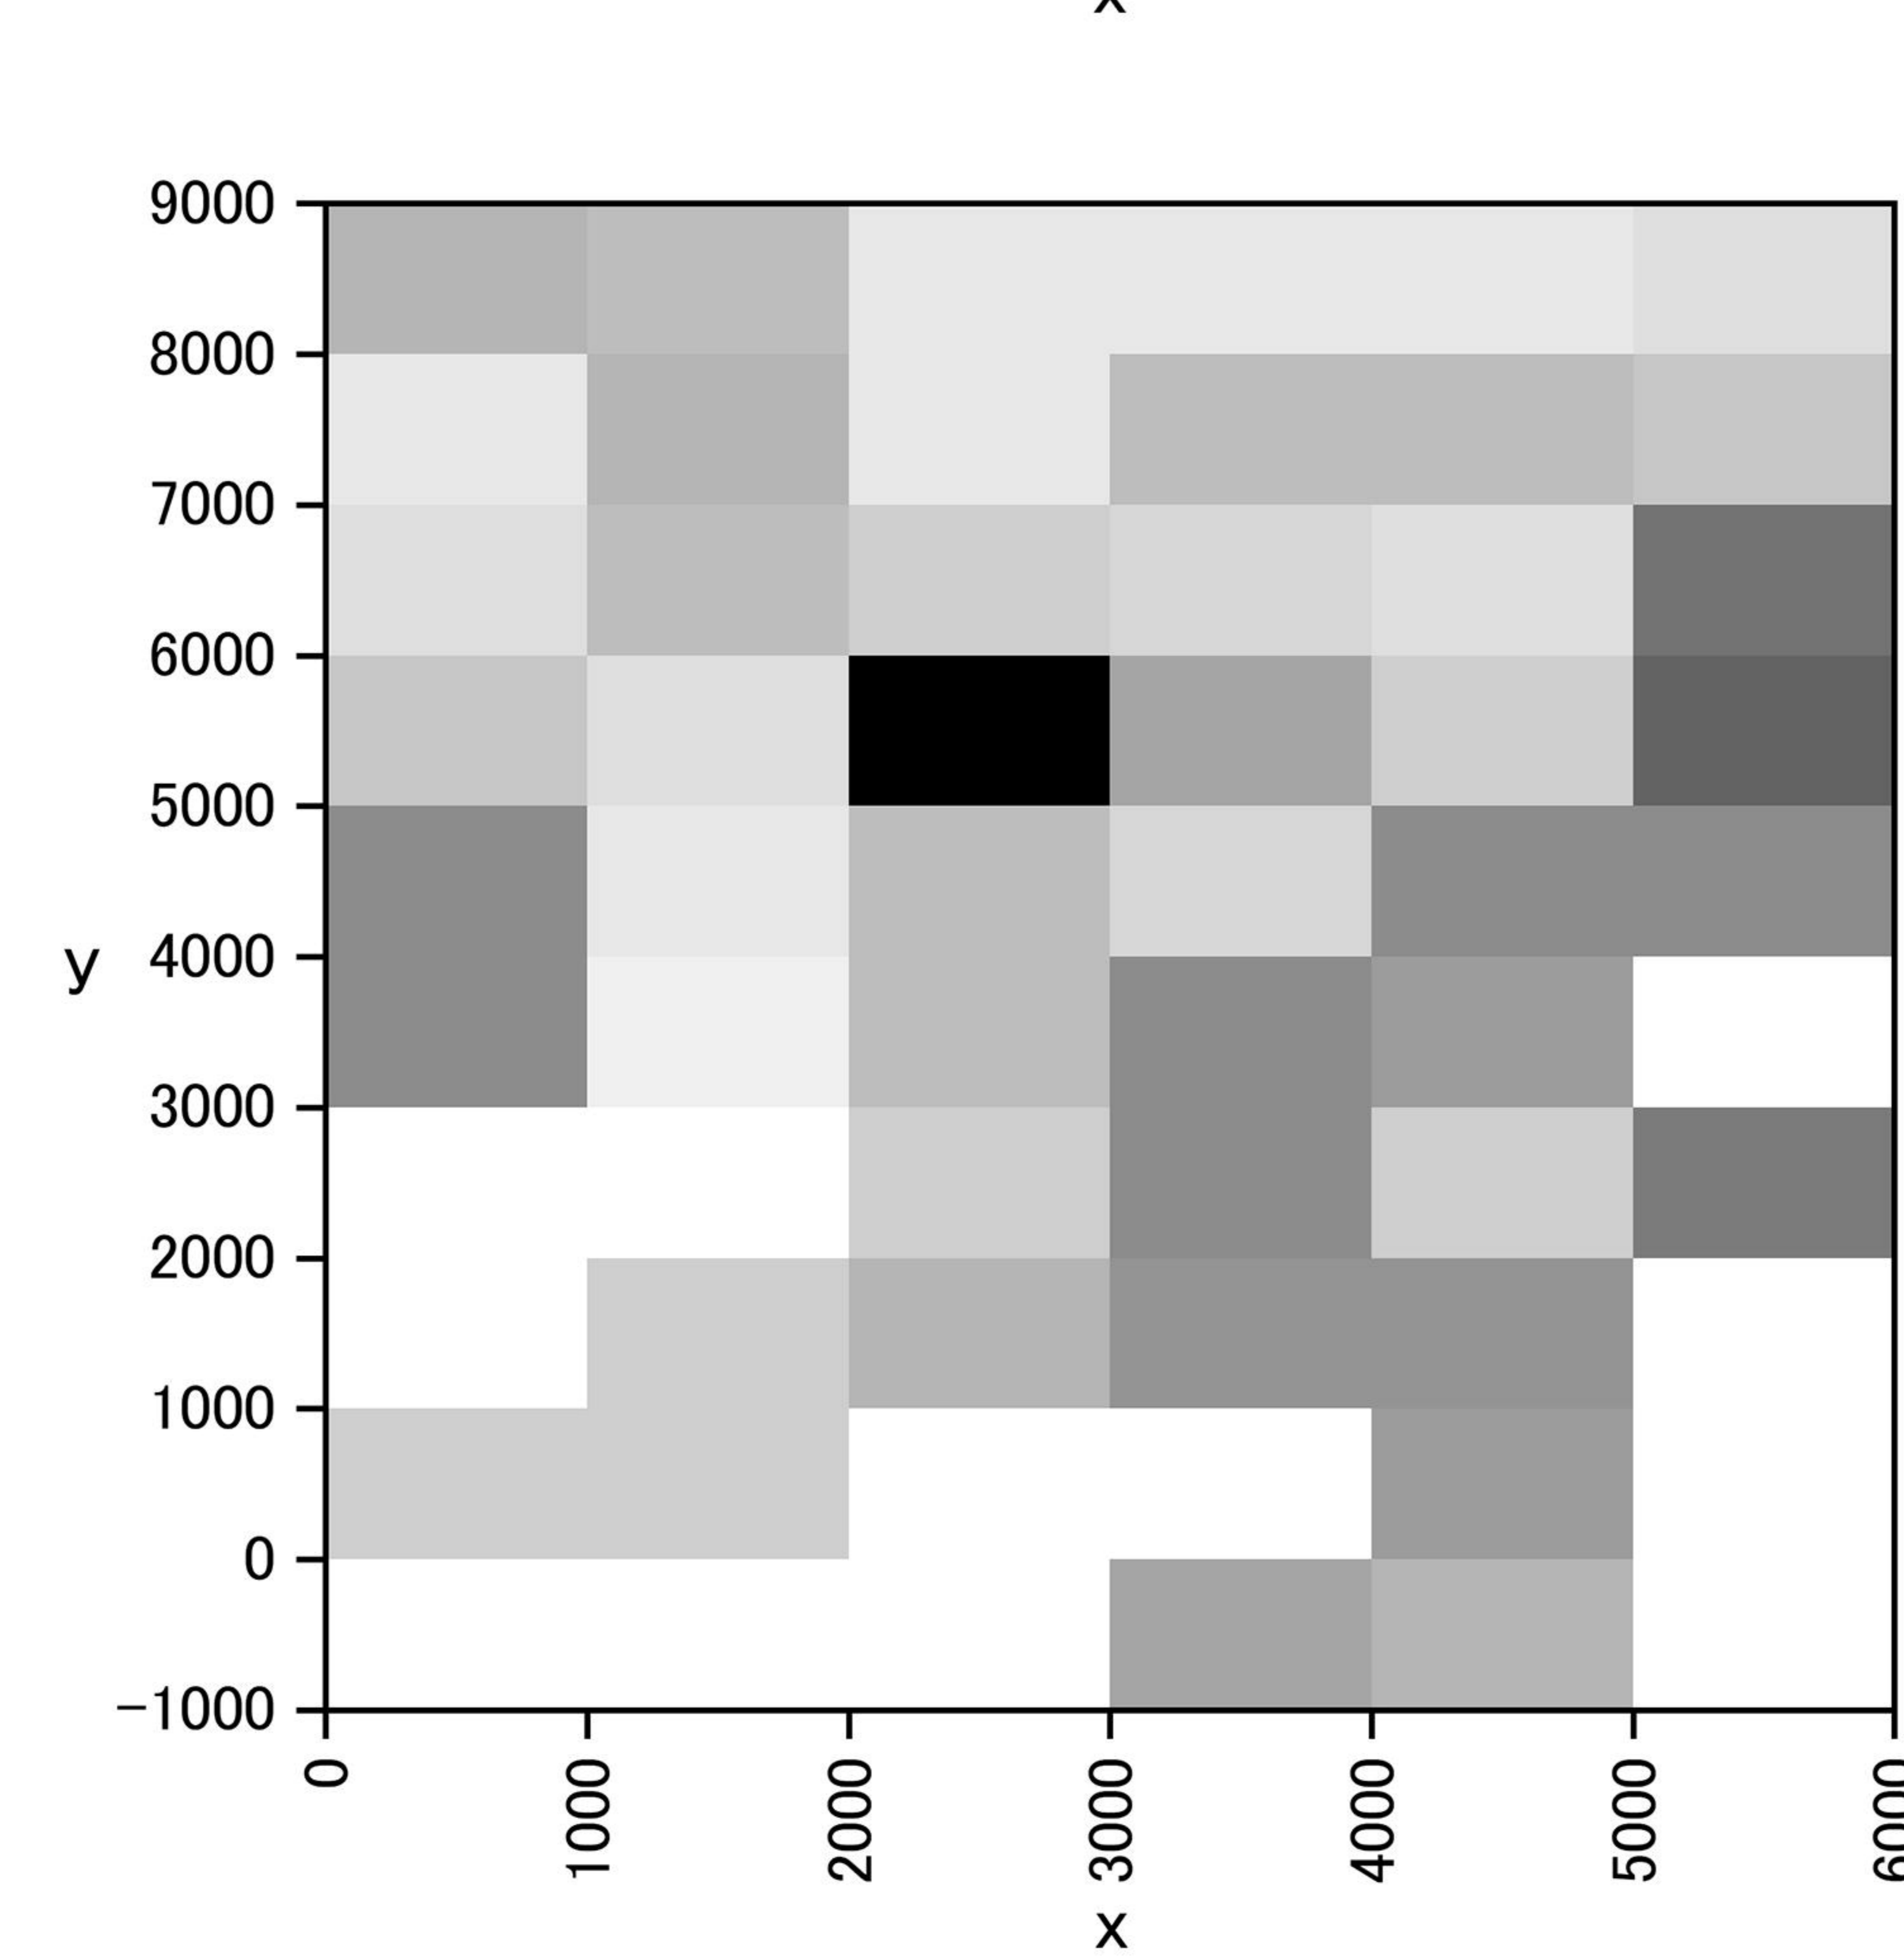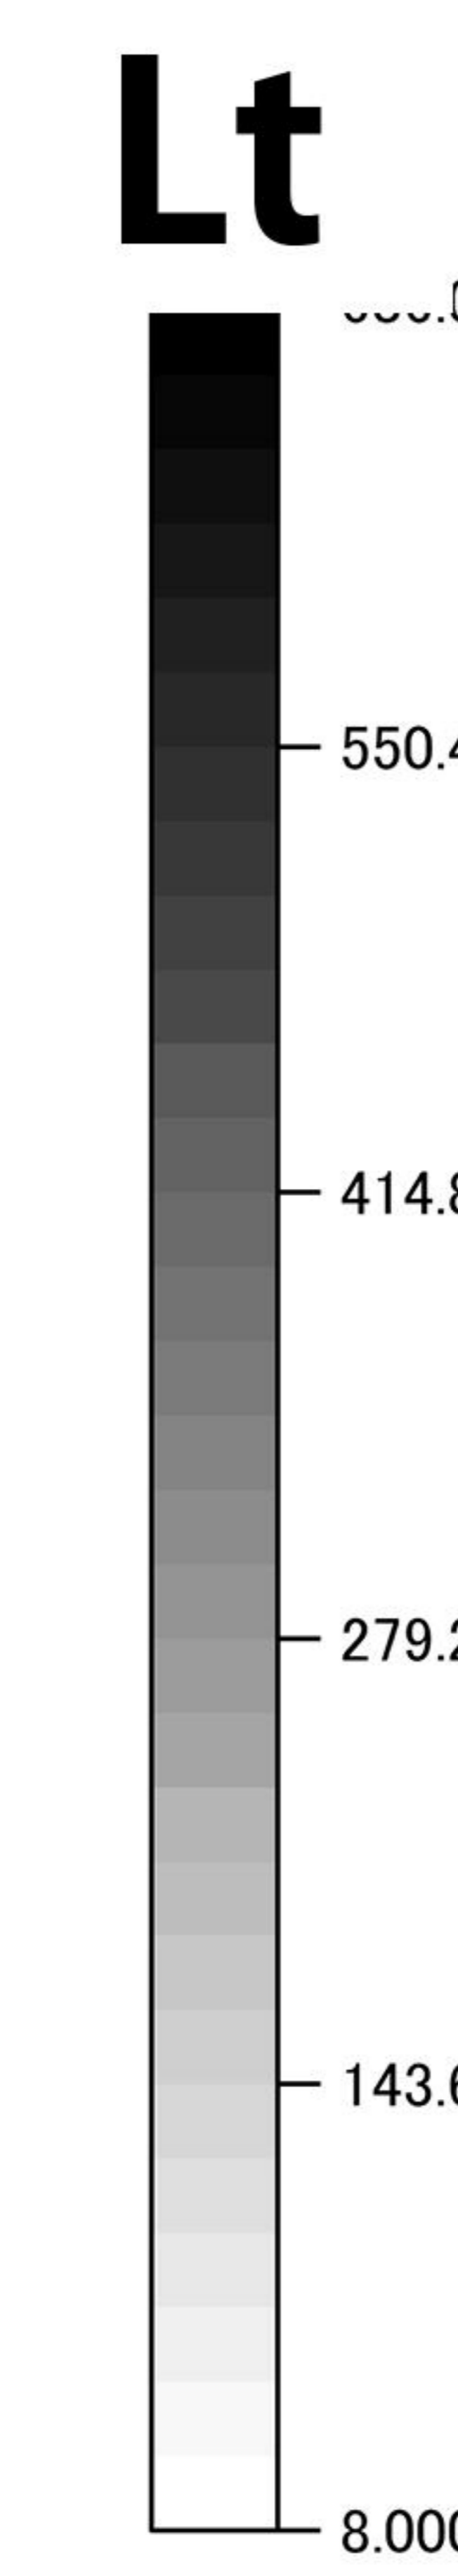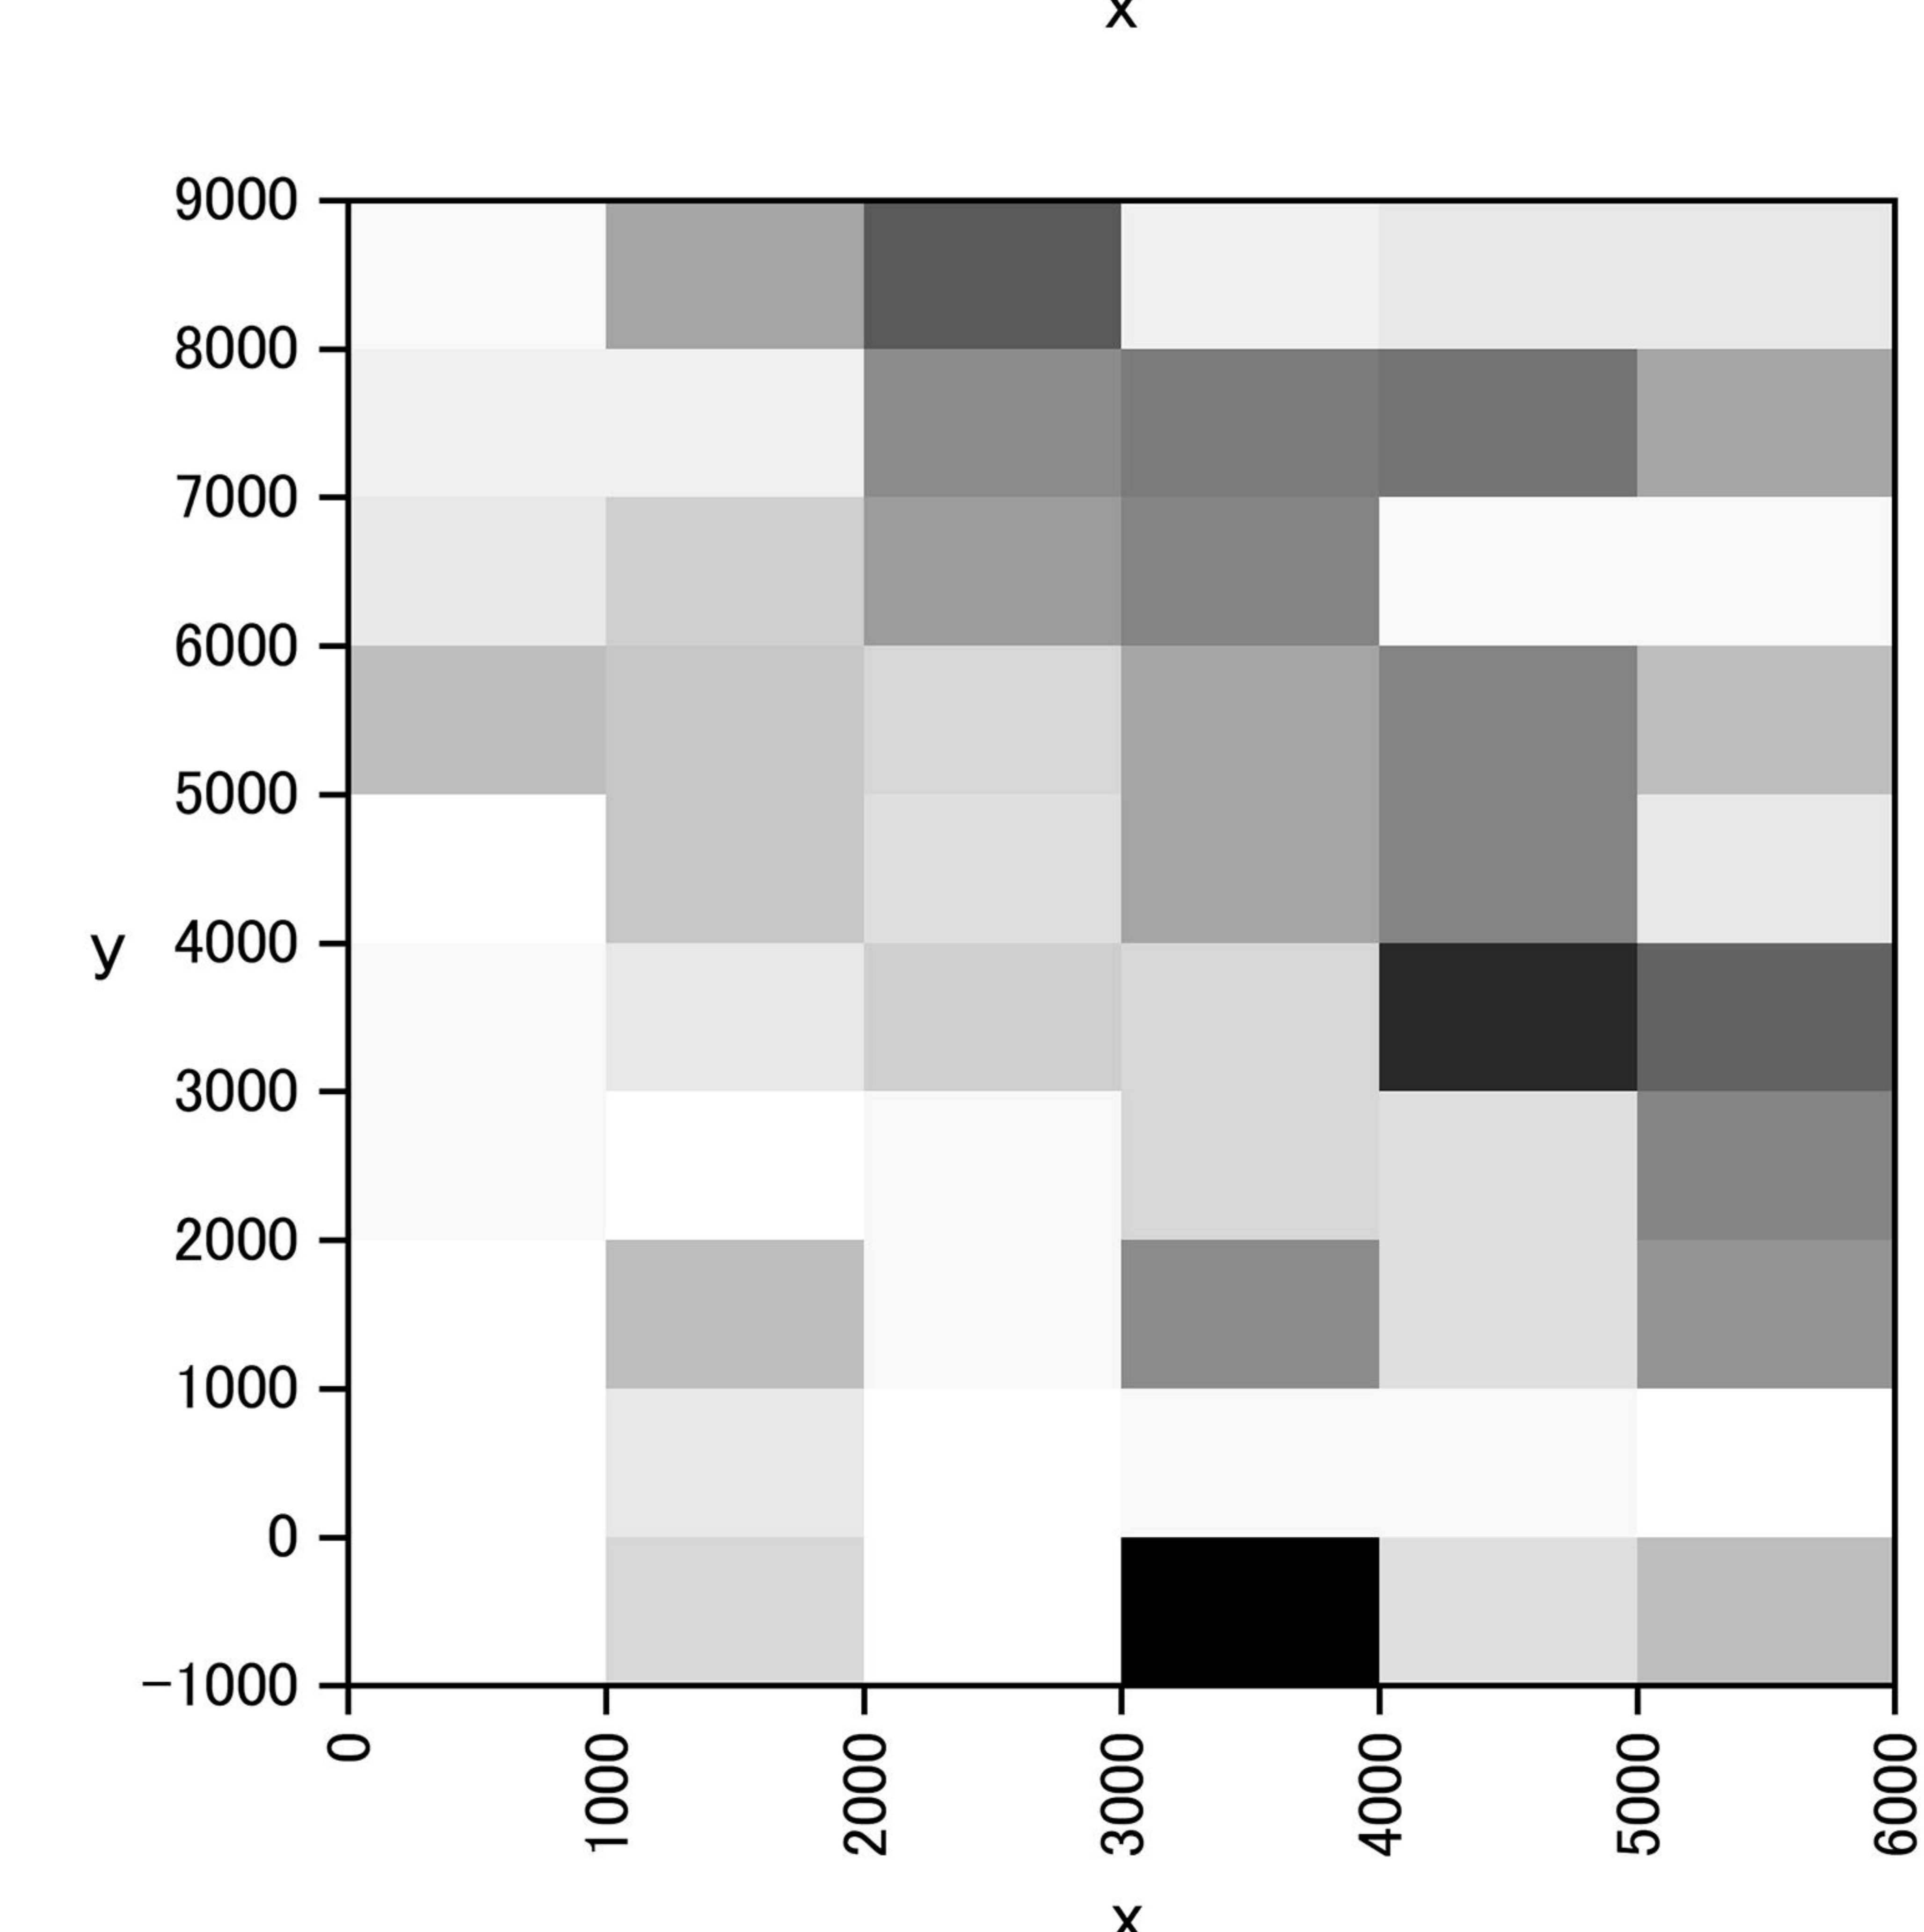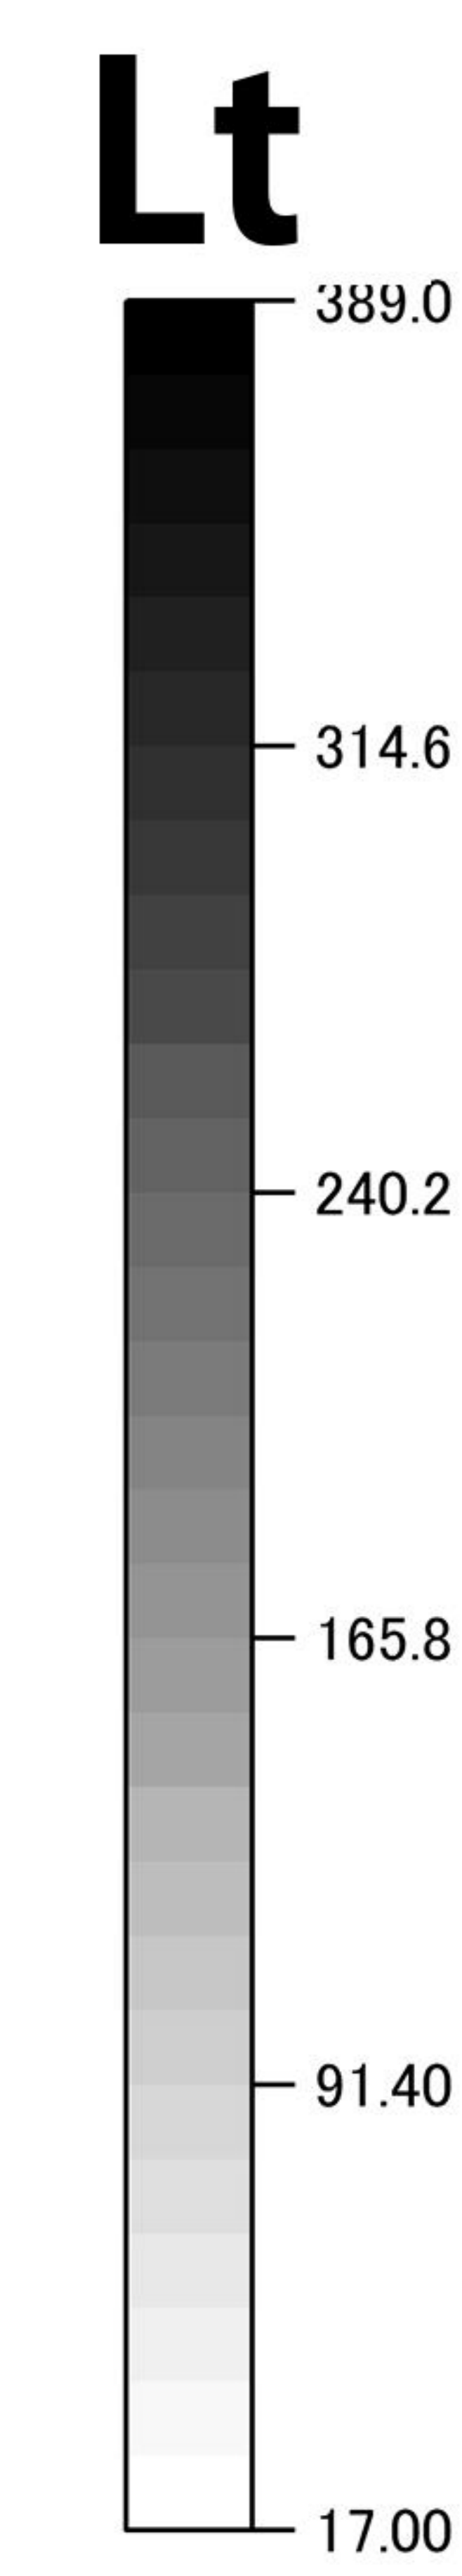

**(A)**

**(B)**

**(C)**

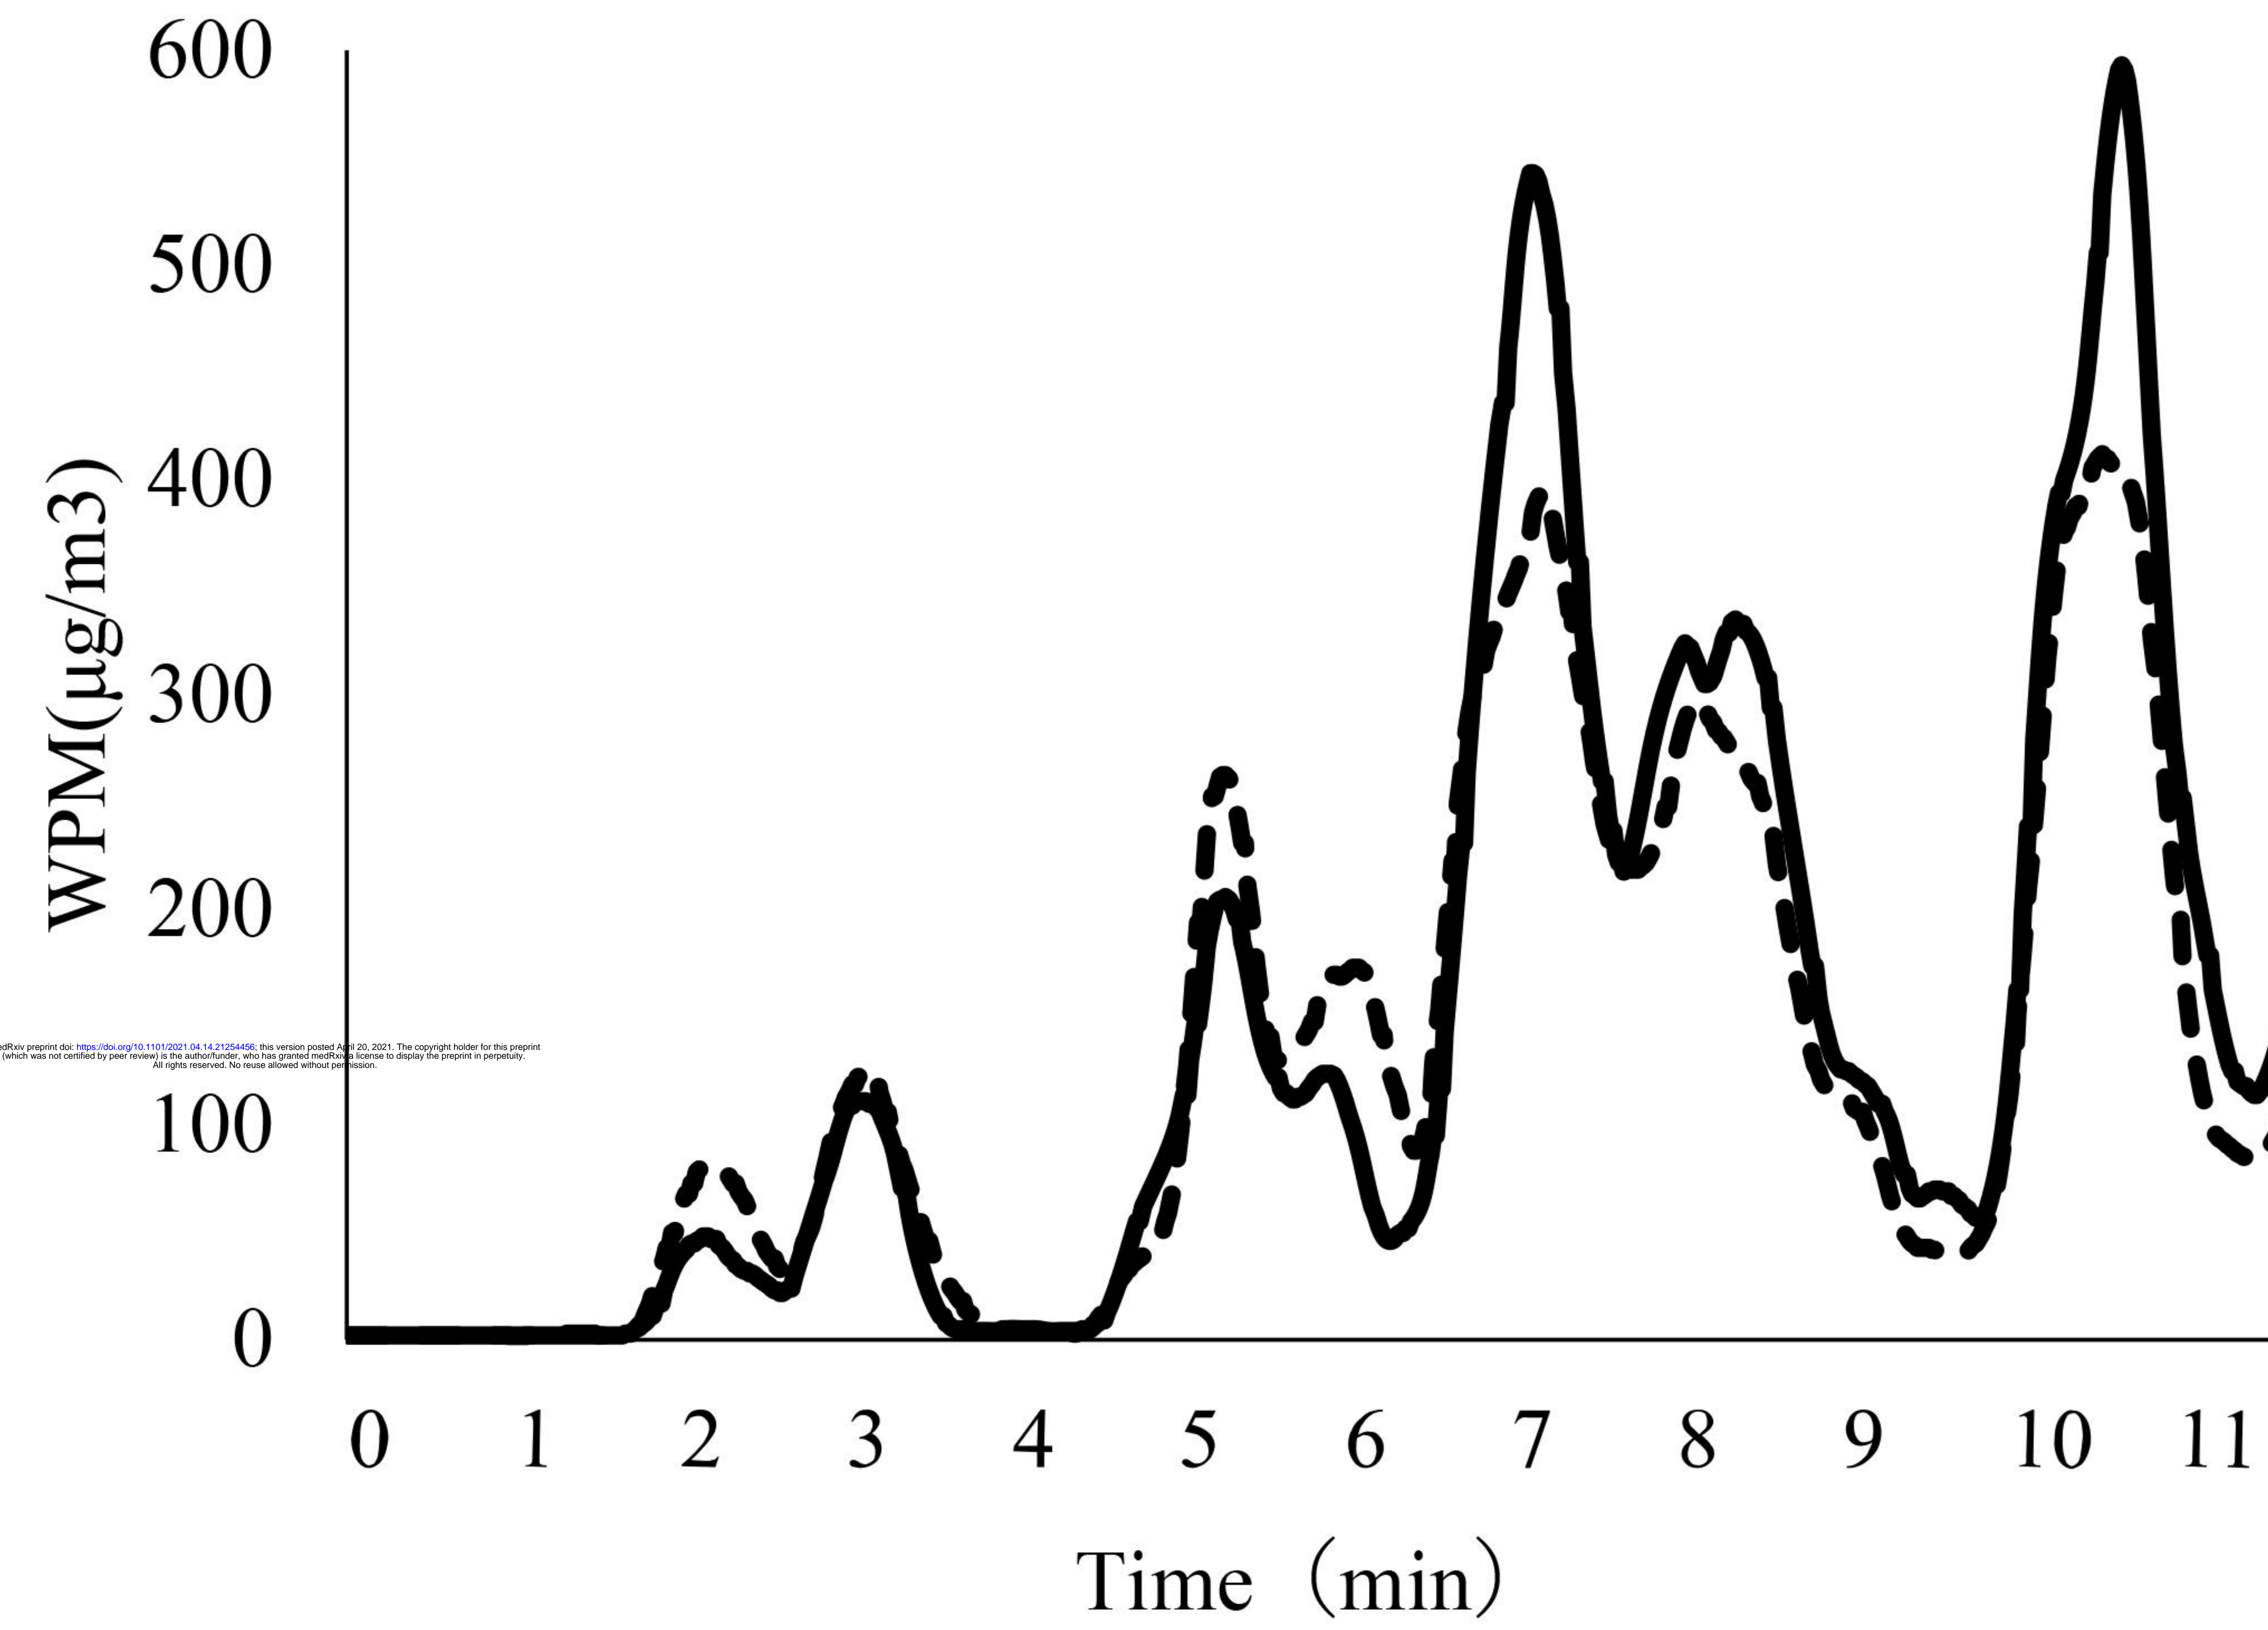

**(A)**

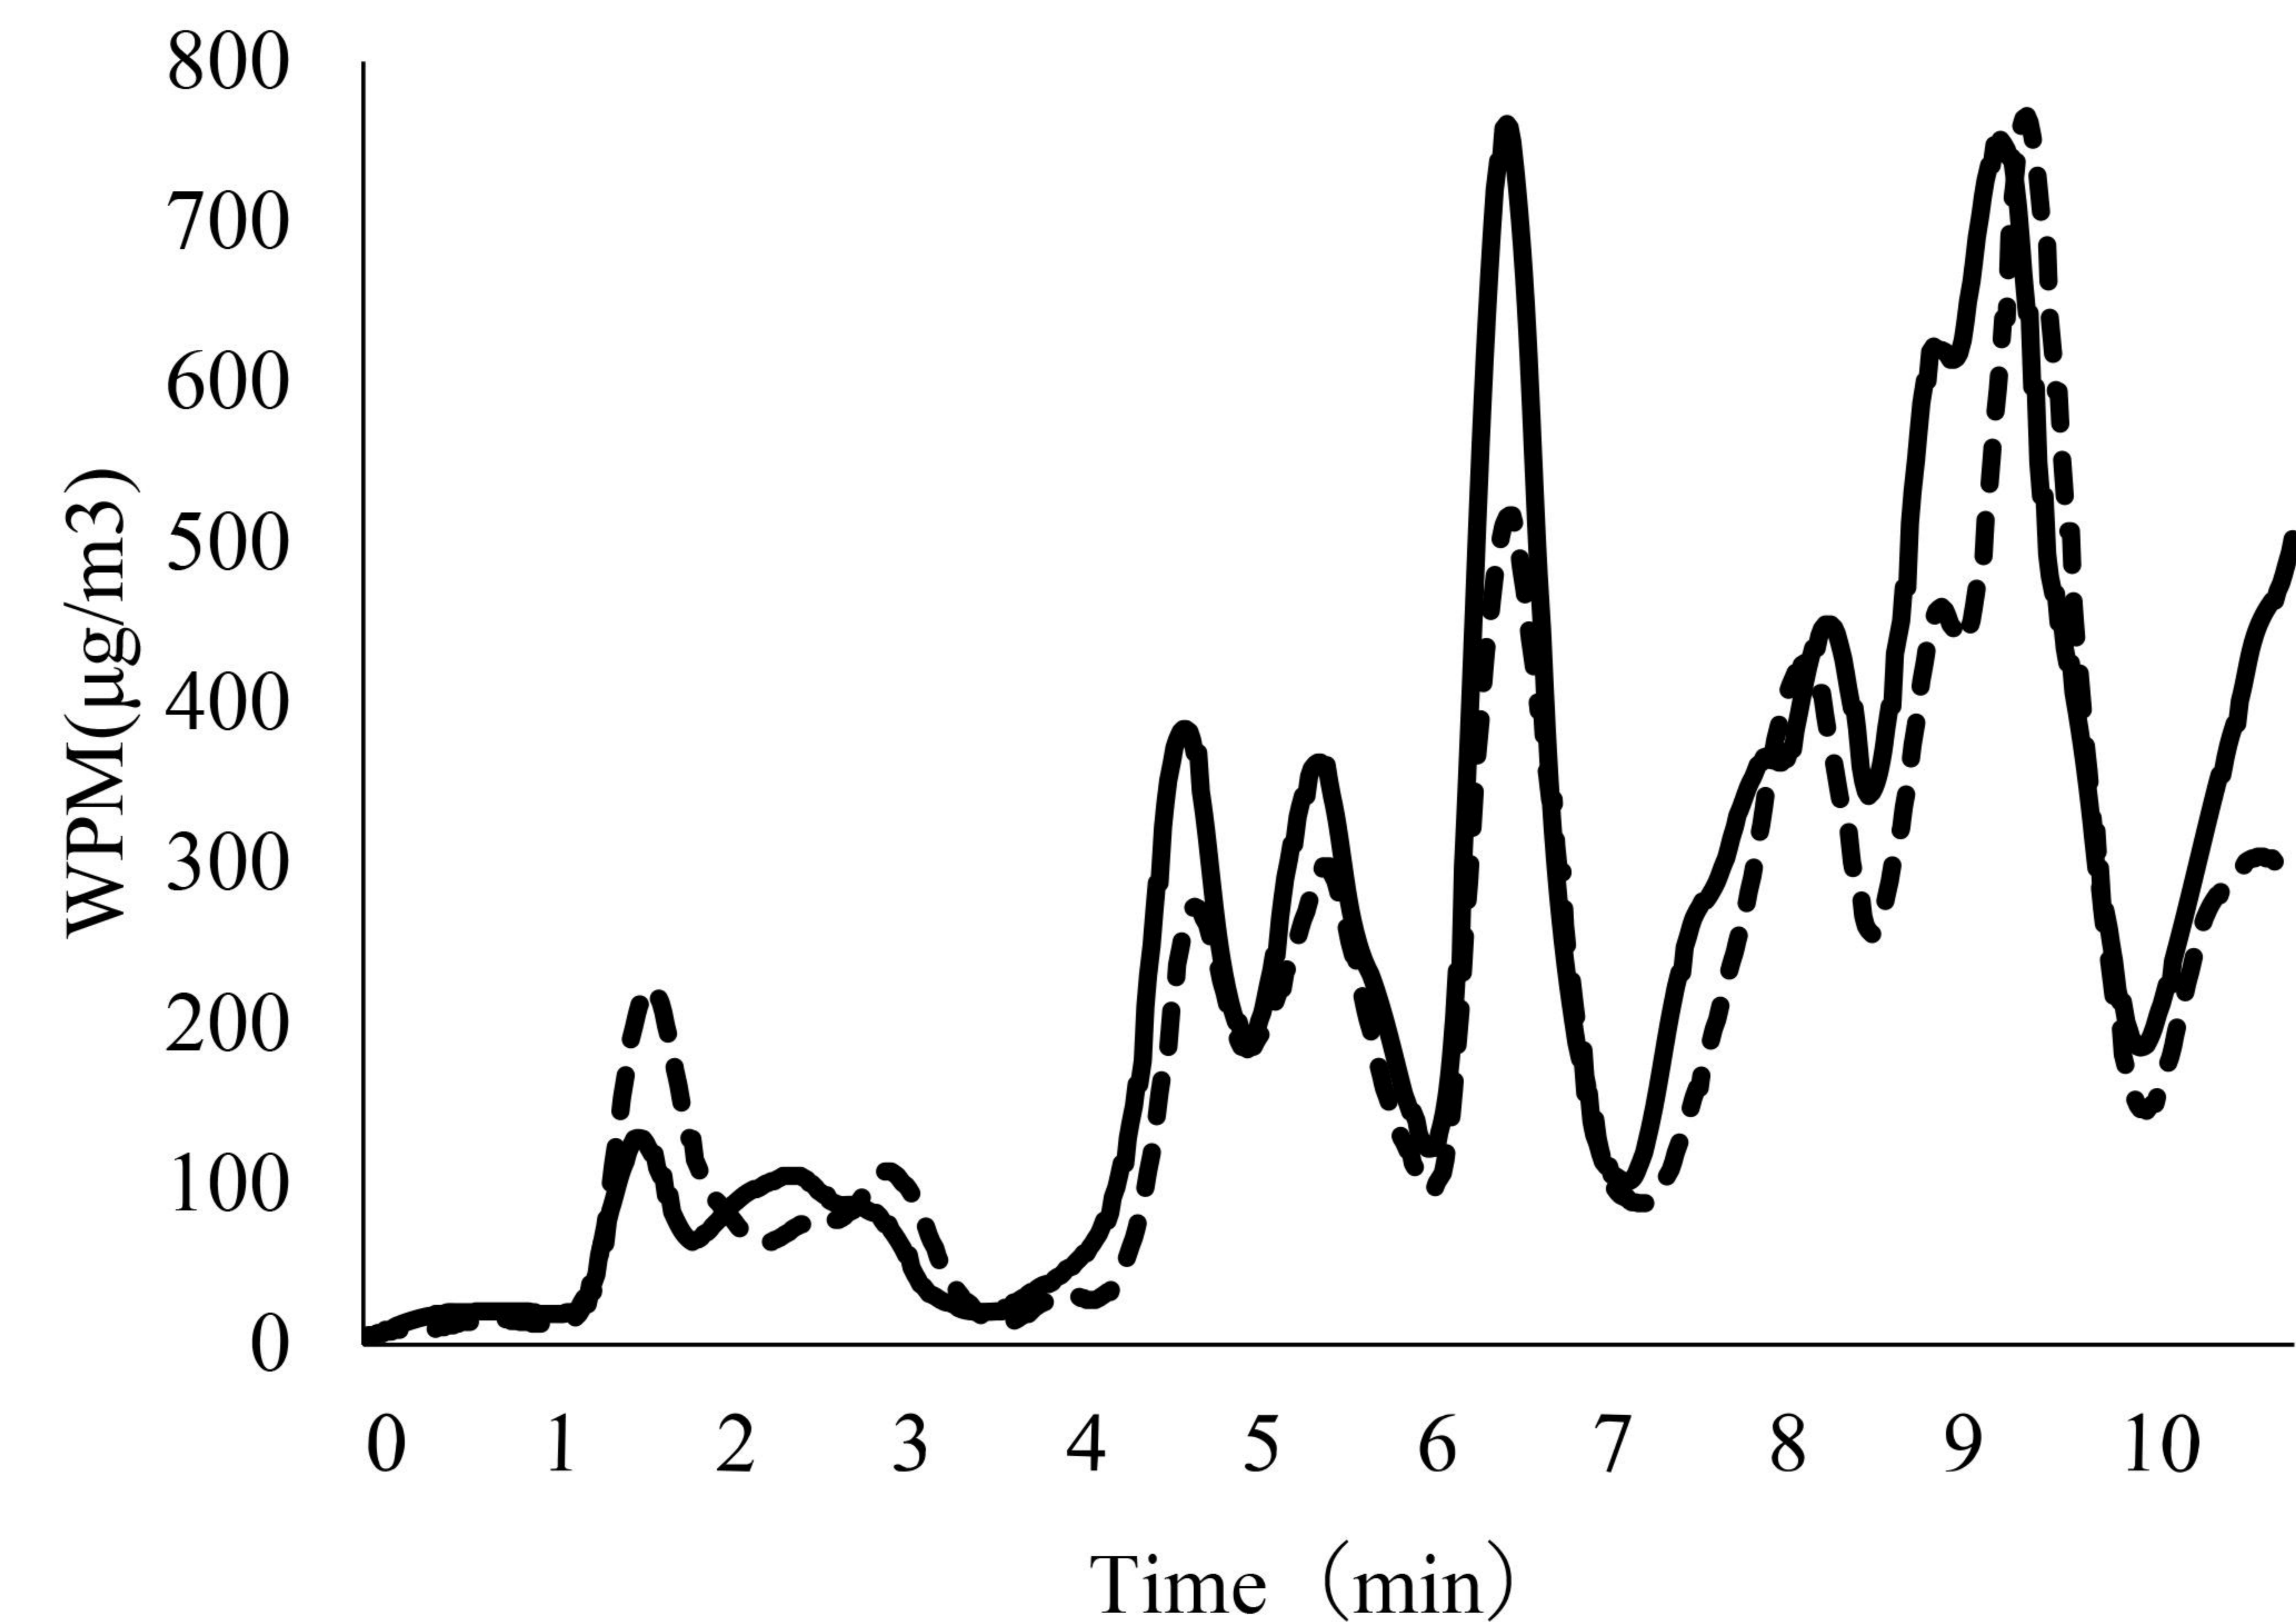

**(B)**

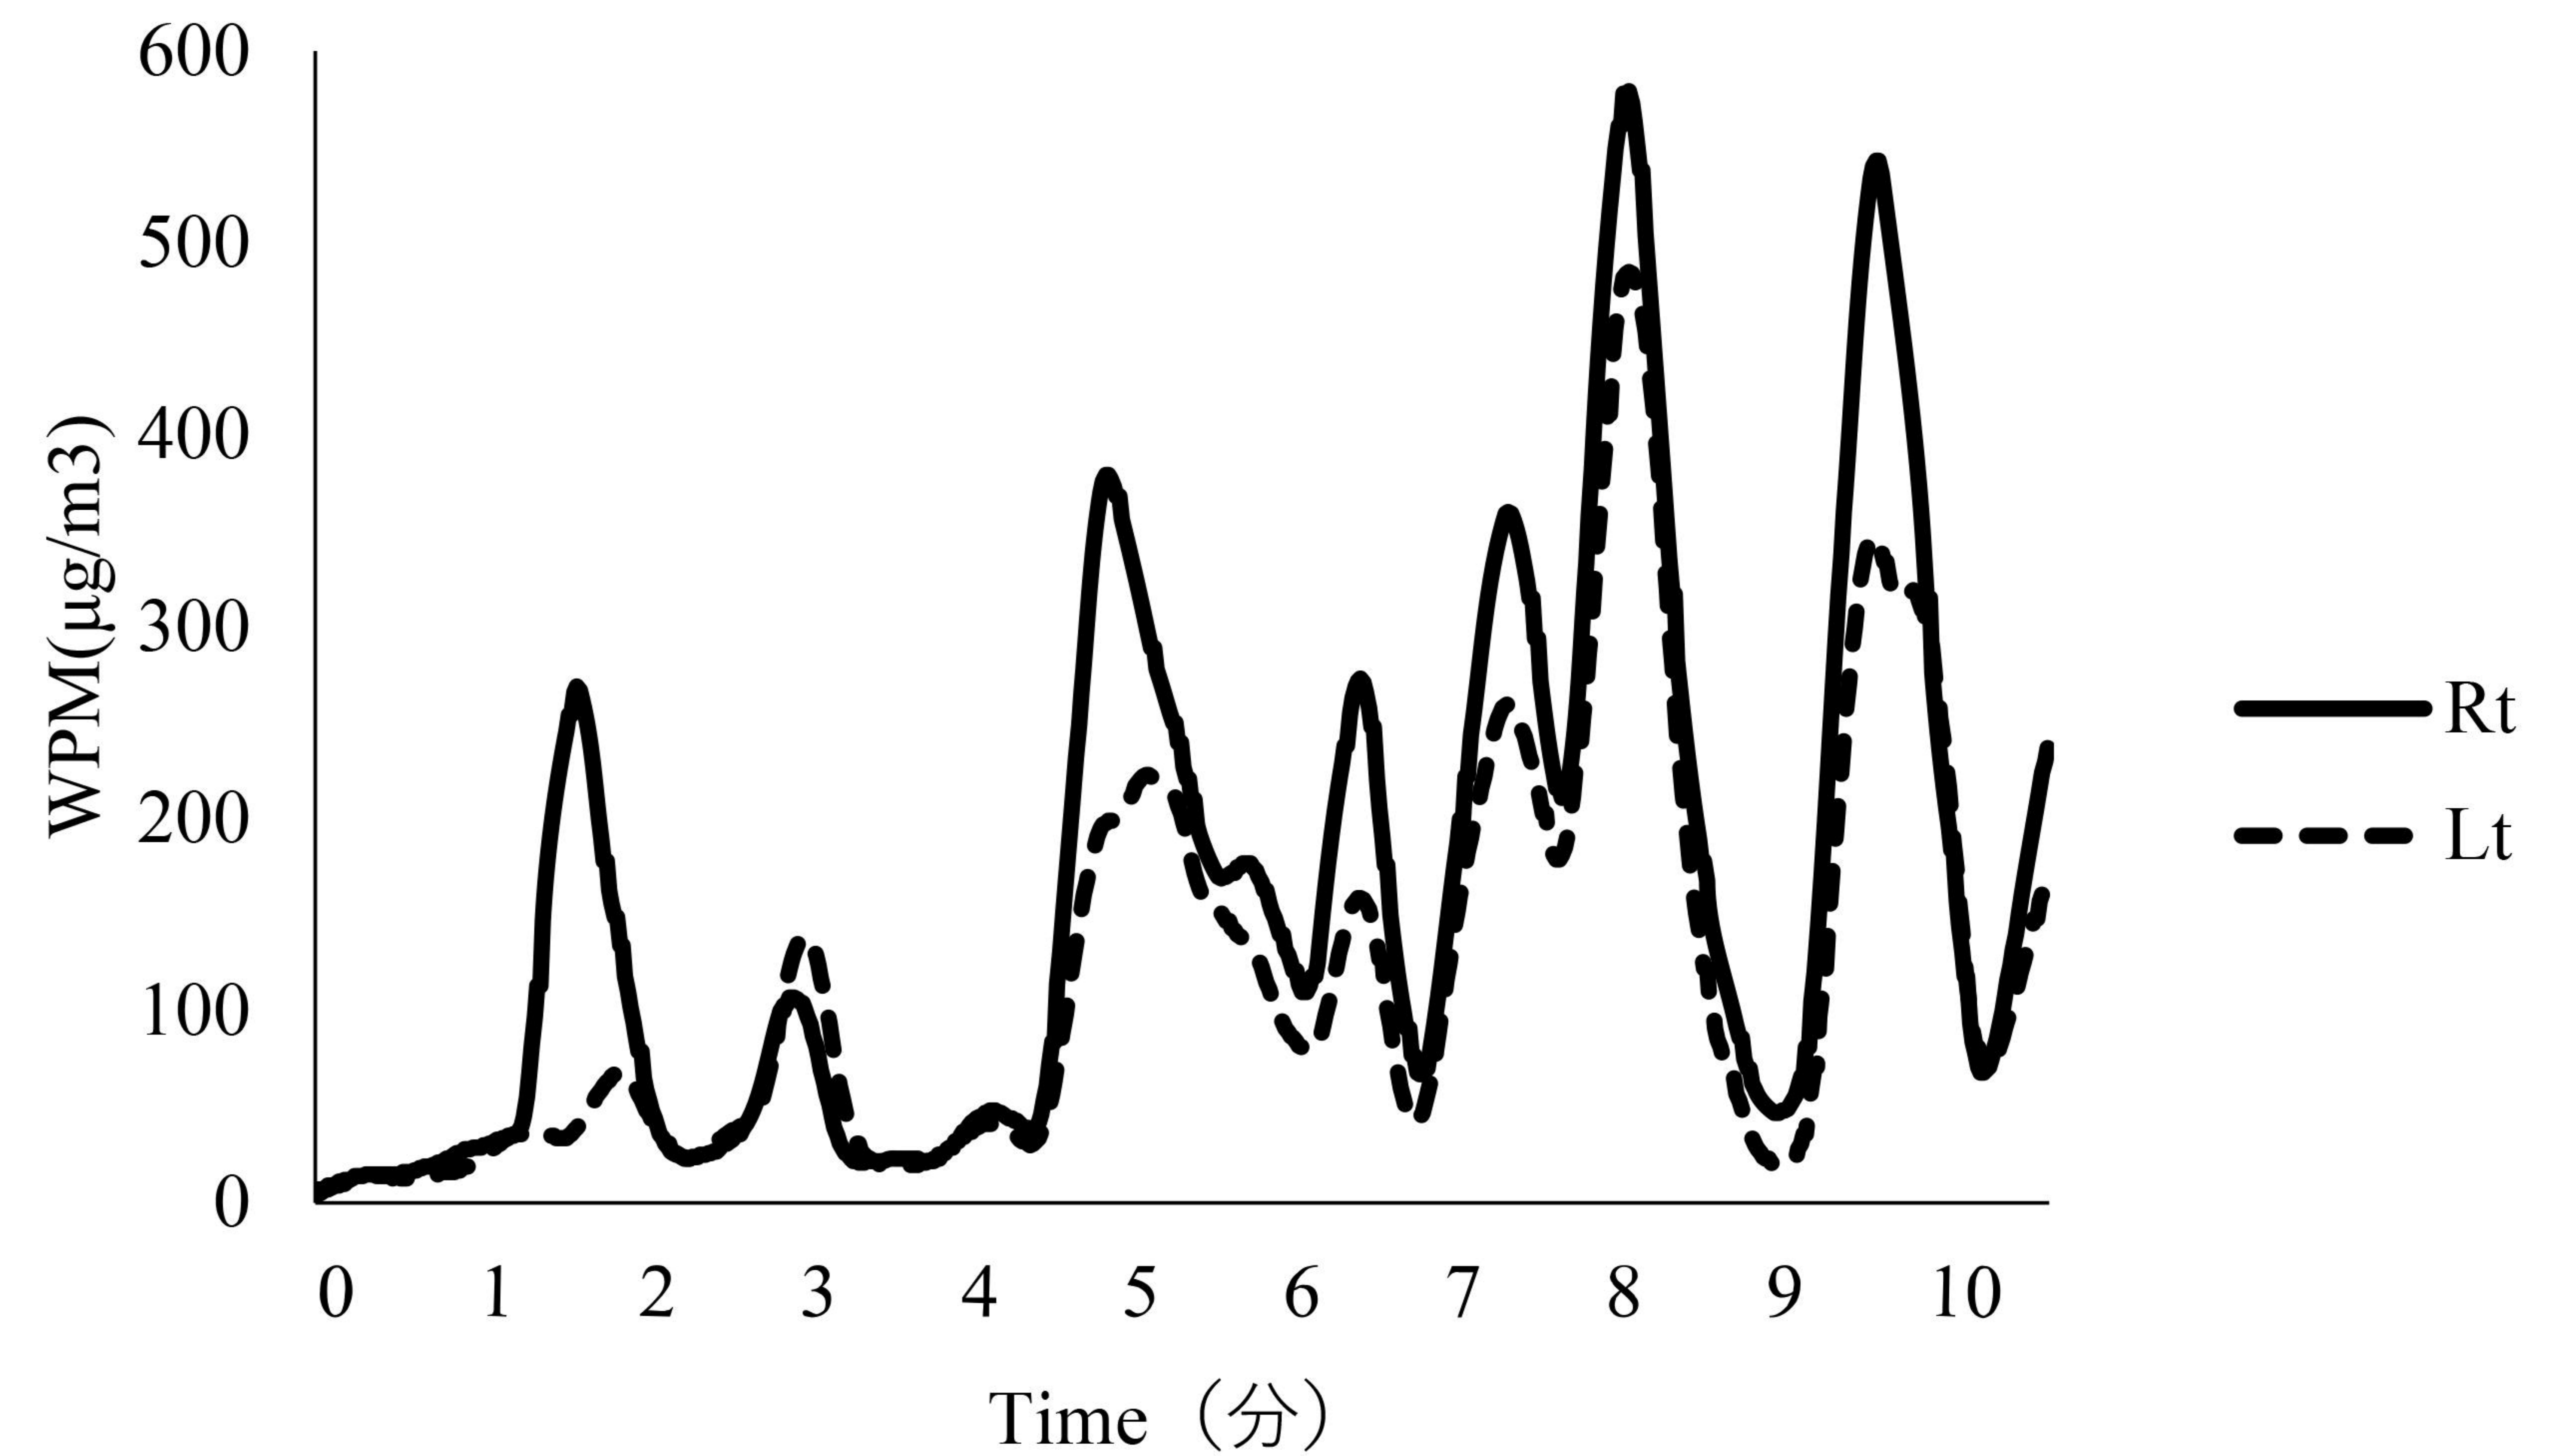

**(C)**

— Rt  
- - Lt
